# Supplementary material for: Branch-Price-and-Cut-Based Solution of Order Batching Problems
Source: Atypon-hosted journal article supplement (doi:10.1287/trsc.2023.1198), 2023-03-09
Supplement: trsc.2023.1198.sm1.pdf [file trsc.2023.1198.sm1.pdf]

This page is intentionally blank. Proper e-companion title page, with INFORMS branding and exact metadata of the main paper, will be produced by the INFORMS office when the issue is being assembled.

## E-Companion

### Appendix A: Detailed Description of Routing Strategies

In the following, we thoroughly describe the routing strategies return, midpoint, traversal, largest gap, composite, combined, and optimal for the rectangular parallel-aisles single-block warehouse specified in Section 2. The descriptions provide all necessary details to clarify our exact interpretation of the strategies and to allow reproduction of our results. For completeness, we also provide a description of the mixed strategy that has recently been proposed by [Bahçeci and Öncan \(2022\)](#). We use the terms *required location* and *required aisle* for those storage locations and picking aisles, respectively, in which there is at least one item to pick, given a set of orders. Figures [EC.1a–EC.1i](#) depict exemplary picker routes for picking the batch comprising orders 2, 4, and 5 and each routing strategy. The items and corresponding storage locations are highlighted in blue and the picker route following each strategy is shown with a dashed line.

**Return** Starting at the depot, the picker moves along the front cross aisle to the rightmost required aisle, i.e., the required aisle furthest from the depot. On the way, the picker enters each required aisle from the front cross aisle, travels towards the required location closest to the back cross aisle, makes a U-turn, and exits the aisle again to the front cross aisle. After exiting the rightmost required aisle, the picker returns to the depot on the front cross aisle.

**Midpoint** The warehouse is virtually divided into a front and a back part such that all storage locations closer to the front (back) cross aisle are assigned to the front (back) part. Storage locations that are exactly in the middle between front and back cross aisle are assigned to the front part. Starting at the depot, the picker moves along the front cross aisle to the leftmost required aisle, i.e., the required aisle closest to the depot. This aisle is traversed completely by entering from the front and exiting to the back cross aisle. The picker then moves along the back cross aisle to the rightmost required aisle. Similar to the return strategy, the picker enters from the back cross aisle all aisles that contain at least one required location in the back part of the warehouse, travels towards the required location closest to the middle, makes a U-turn, and exits the aisle again to the back cross aisle. The rightmost required aisle is traversed completely and the picker returns along the front cross aisle to the depot. All aisles between the left- and rightmost that contain at least one required location in the front part of the warehouse are visited from the front cross aisle in the analog fashion as those of the back part. In the special case that there is only a single required aisle, the route is the same as in the return strategy.

**Traversal** Starting at the depot, the picker moves horizontally to the rightmost required aisle. Each required aisle is traversed completely so that the picker enters from and exits to different cross aisles. After each traversal, the horizontal movement to the rightmost required aisle is continued on the opposite cross aisle. If the number of required aisles is even, the picker traverses the last one from the back to the front cross aisle and travels back to the depot on the front cross aisle. If the number of required aisles is odd, the picker visits the last one in a return fashion entering from and exiting to the front cross aisle and travels back to the depot on the front cross aisle.

**Largest Gap** This strategy is similar to the midpoint strategy. If there is only a single required aisle, the route is the same as in the return strategy. Otherwise, the picker travels horizontally on the front cross aisle from the depot to the leftmost required aisle, traverses this aisle completely, continues horizontally on the back cross aisle to the rightmost required aisle, traverses this aisle completely, and travels back to the depot on the front cross aisle. The other required aisles are visited on the way from/to the depot in a return fashion either from and to only one of the cross aisles or from and to both cross aisles, depending on the largest gap in this aisle. The largest gap in an aisle is the largest value of any of the following: (i) the distance between the front cross aisle and its closest required location, (ii) the distance between the back cross aisle and its closest required location, or (iii) the distance between any pair of required locations for which no third required location is closer to both locations. The aisle is then visited such that the largest gap in this aisle is not traversed. In Figure [EC.1d](#), the largest gaps are highlighted in orange. If the largest gap is between the front (back) cross aisle and the required location closest to it as in the second (fourth) aisle, then a return from and to the back (front) cross aisle is performed. If the largest gap is between any two required locations (third aisle), then returns from and to both cross aisles are performed.

**Composite** The composite strategy combines elements of the traversal and return strategies. Starting from the depot and on the front cross aisle, the picker moves horizontally to the rightmost required aisle visiting all required aisles on the way and returns on the front cross aisle to the depot. Each required aisle is either traversed completely (changing from the front to the back cross aisle and vice versa) or visited in a return fashion entering from and exiting to the same cross aisle. The choice on how to visit an aisle is made individually for each aisle in a pure greedy fashion. There are two interpretations in the literature. For a given required aisle and the cross aisle on which the picker arrives at this aisle, [Petersen \(1995\)](#) chooses traversal or return based on which of the two gives a shorter distance between the farthest required location from the current cross aisle in the current aisle and the farthest required location from the current cross aisle in the next required aisle. [Roodbergen \(2001\)](#) and [Scholz and Wäscher \(2017\)](#), on the other hand, choose traversal whenever the distance between the farthest required location and the current cross aisle is more than half of the distance of a full traversal. Otherwise, they choose a return visit. In both interpretations, the rightmost required aisle has to be visited such that the picker exits to the front cross aisle, i.e., performing a traversal if the picker arrives at the rightmost required aisle on the back cross aisle and performing a return visit otherwise.

**Combined** The combined strategy is an enhanced version of the composite strategy. The only difference is that the choice whether an aisle is visited with a traversal or a return is not made individually for each aisle in a greedy fashion. Instead, these visits are performed such that the best possible route using only these in-aisle visits results. To this end, a simple DP algorithm can be used. We refer to [Roodbergen \(2001\)](#) for details.

**Mixed** The mixed routing strategy is similar to the midpoint and largest gap strategies. It adds elements of the return strategy to the midpoint strategy. The only difference from the midpoint strategy is that the required aisles between the leftmost and rightmost required aisles can be visited according to either the

midpoint strategy, i.e., return visits to and from both cross aisles up to the middle of the aisles, or the return strategy, i.e., a single return visit to and from the same cross aisle. An alternative description is as follows. The mixed strategy differs from the largest gap strategy by allowing visits from and to both cross aisles only in the case that the gap that is not traversed is between two required locations that are on different parts (front and back) of the warehouse. We refer to [Bahçeci and Öncan \(2022\)](#) for details.

**Optimal** The optimal strategy follows a distance-minimal route of all possible picker routes which can in principle be computed by solving a traveling salesman problem (TSP) over the required locations. For a rectangular parallel-aisles single-block warehouse, the problem can be solved in linear time (linear in the sum of the number of aisles and the number of required locations) by means of a DP approach. We refer to [Ratliff and Rosenthal \(1983\)](#) for a detailed description of this DP algorithm. Note that the optimal strategy allows all possible in-aisle visits, i.e., traversal, a single return visit from the front or back cross aisle, and a double return visit from the front and back cross aisles as in the largest gap strategy, as well as all possible traversals from one required aisle to the next.

## Appendix B: Proof of Proposition 1

PROPOSITION 1. *The routing strategies return, midpoint, traversal, largest gap, combined, mixed, and optimal are monotone.*

*Proof.* Let  $b_1$  and  $b_2$  be two feasible batches with  $b_1 \subseteq b_2$ . We need to show that  $c_{b_1} \leq c_{b_2}$  holds for the routing strategies.

Let  $R$  denote the set of additional required locations of  $b_2$  compared to  $b_1$ . Without loss of generality, we assume in the following that  $R \neq \emptyset$  (otherwise  $c_{b_1} \leq c_{b_2}$  obviously holds for all routing strategies). Note further that for any batch and all strategies except optimal, the total horizontal distance traveled on the cross aisles is exactly twice the distance from the depot to the rightmost required aisle. Thus, this distance strictly increases if there is an additional required location in  $R$  located in an aisle further from the depot than the rightmost required aisle of  $b_1$ . Otherwise it stays the same. For these strategies, it suffices to consider the distances traveled within the required aisles (including the distances to enter from/exit to the cross aisles) in the following.

**Return** Any additional required location in  $R$  that is located in a required aisle of  $b_1$  but not closer to the back cross aisle than each required location of  $b_1$  in this aisle does not change the distance traveled within the respective aisle. Any additional required location in  $R$  that is located either in a required aisle of  $b_1$  and closer to the back cross aisle than each required location of  $b_1$  in this aisle or in an aisle that is not required in  $b_1$  strictly increases the distance traveled within the respective aisle. Thus,  $c_{b_1} \leq c_{b_2}$  obviously holds for the return strategy.

**Midpoint** Consider first the special case of a single required aisle in  $b_1$ . If all additional required locations in  $R$  are also located in this aisle, then  $c_{b_1} \leq c_{b_2}$  follows with the same arguments as for the return strategy. If there is at least one additional required location in  $R$  located in a different aisle, then the left- and rightmost required aisles are both traversed completely for  $b_2$  implying a traveled distance of  $2(L + 2a)$  within these

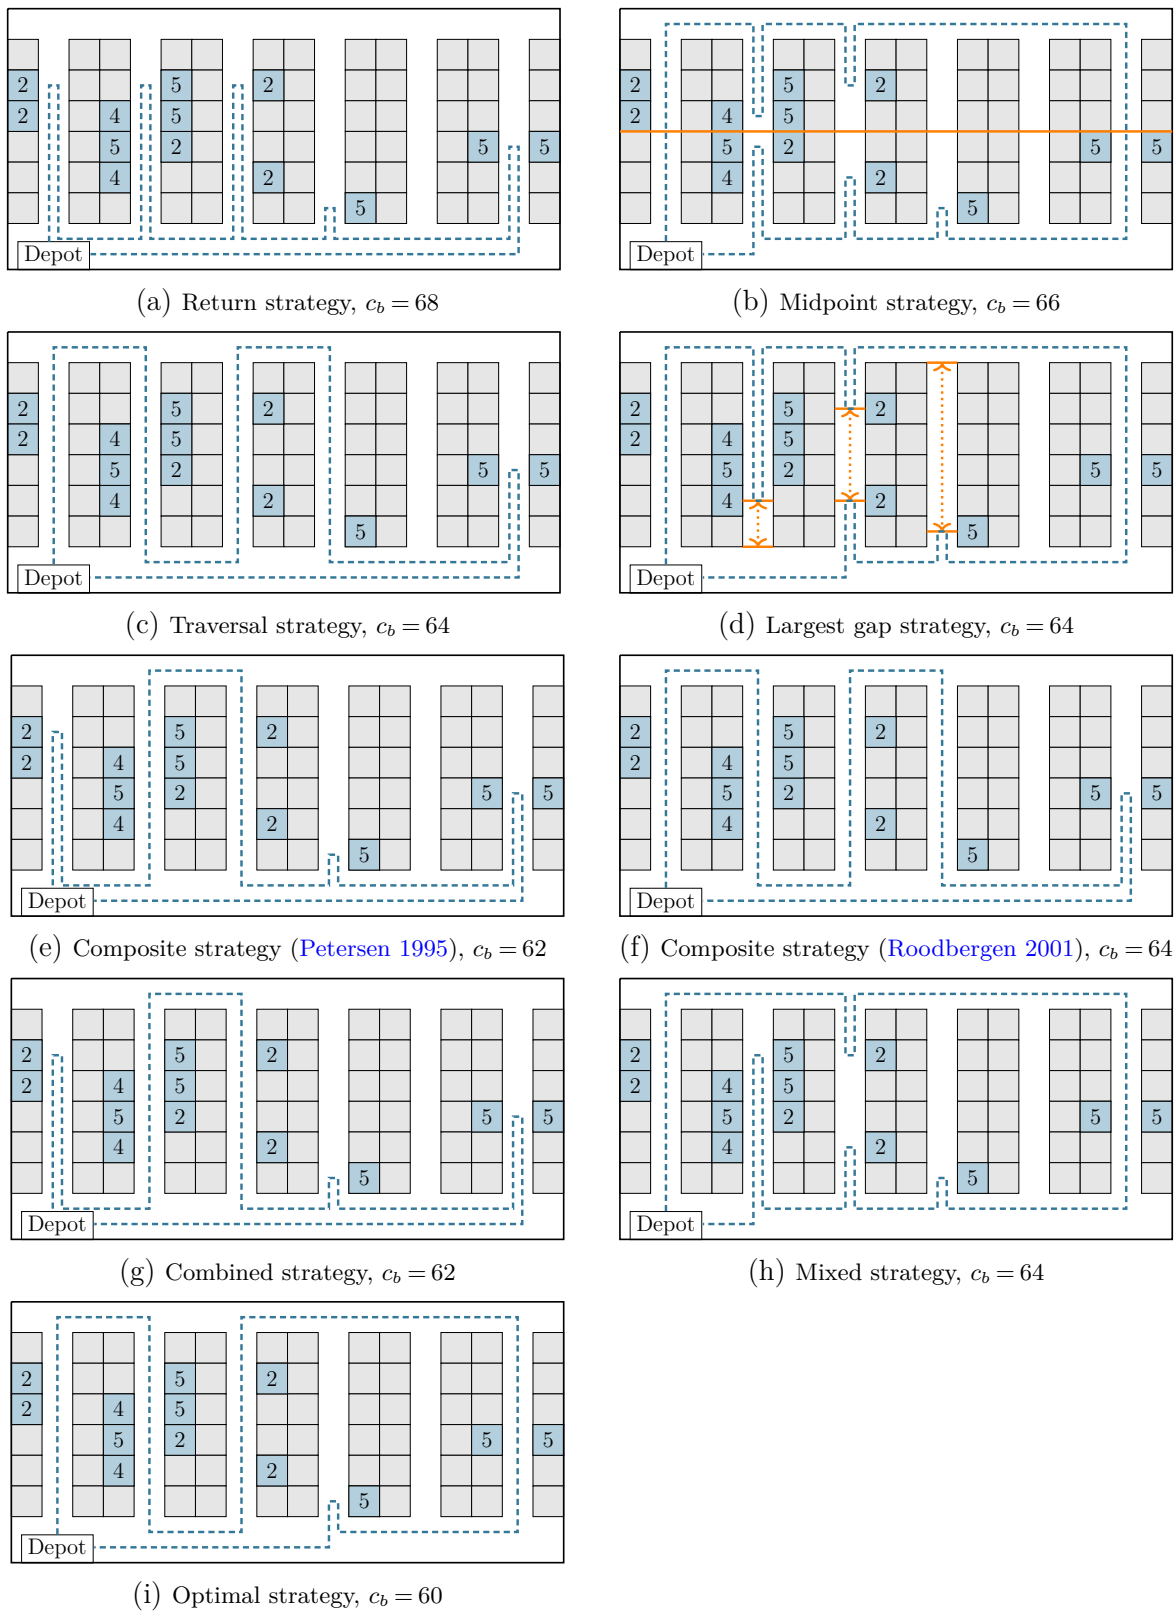

**Figure EC.1** Picker routes for batch  $b = \{2, 4, 5\}$  and different routing strategies

aisles. The maximum possible distance traveled within the single required aisle of  $b_1$  is  $2(L - \ell/2 + a)$  if a required location is the one closest to the back cross aisle, so that  $c_{b_1} \leq c_{b_2}$  also holds in this case.

Consider now the general case with multiple required aisles in  $b_1$ . If the left- or rightmost required aisles are not identical for  $b_1$  and  $b_2$ , then different aisles are traversed completely in  $b_1$  and  $b_2$ . The distances traveled, however, do not change. Then,  $c_{b_1} \leq c_{b_2}$  immediately follows with similar arguments as in the return strategy.

**Traversal** We need to distinguish several cases:

- (i) If the number of required aisles is even for  $b_1$  and  $b_2$ , then any aisle traversed in  $b_1$  is also traversed in  $b_2$  and  $c_{b_1} \leq c_{b_2}$  obviously holds.
- (ii) If the number of required aisles is odd for  $b_1$  and  $b_2$  and the rightmost required aisle is identical for  $b_1$  and  $b_2$ , then any aisle traversed in  $b_1$  is also traversed in  $b_2$  and, with the same arguments as for the return strategy, the distance traveled in the rightmost required aisle for  $b_2$  cannot be smaller than the distance for  $b_1$  so that  $c_{b_1} \leq c_{b_2}$  has to hold.
- (iii) If the number of required aisles is odd for  $b_1$  and  $b_2$  but the rightmost required aisle is not identical for  $b_1$  and  $b_2$ , then any aisle traversed in  $b_1$  is also traversed in  $b_2$  and there are at least two additional required aisles in  $b_2$ . At least one of these is also traversed completely in  $b_2$  (the other might be the rightmost required aisle of  $b_2$  which is not traversed completely). In addition, the rightmost required aisle of  $b_1$  is also traversed completely in  $b_2$  instead of the return visit in  $b_1$ . For  $b_2$ , the total distance traveled within these two aisles is thus  $2(L + 2a)$ . For  $b_1$ , the maximum possible distance traveled within its rightmost required aisle is  $2(L - \ell/2 + a)$  if a required location is the one closest to the back cross aisle, so that  $c_{b_1} \leq c_{b_2}$  also holds in this case.
- (iv) If the number of required aisles is odd for  $b_1$  but even for  $b_2$ , then any aisle traversed in  $b_1$  is also traversed in  $b_2$ , there is at least one additional required aisle in  $b_2$ , and the rightmost aisle is traversed completely for  $b_2$  instead of the return visit for  $b_1$ . This additional required aisle as well as the rightmost required aisle of  $b_1$  are traversed completely in  $b_2$  resulting in a traveled distance of  $2(L + 2a)$  within these two aisles. For  $b_1$ , the maximum possible distance traveled within its rightmost required aisle is  $2(L - \ell/2 + a)$  if a required location is the one closest to the back cross aisle, so that  $c_{b_1} \leq c_{b_2}$  also holds in this case.
- (v) If the number of required aisles is even for  $b_1$  but odd for  $b_2$ , then any aisle traversed in  $b_1$  is also traversed in  $b_2$  except for the rightmost required aisle of  $b_1$ , there is at least one additional required aisle in  $b_2$ , and the rightmost aisle is visited in return fashion for  $b_2$  instead of the complete traversal for  $b_1$ . The traversal of the additional required aisle in  $b_2$  obviously implies the same distance as the complete traversal of the rightmost required aisle in  $b_1$ , and it immediately follows that  $c_{b_1} \leq c_{b_2}$ .

**Largest Gap** The special case of a single required aisle in  $b_1$  follows with the exact same arguments as for the midpoint strategy. For the general case of multiple required aisles in  $b_1$ , recall that required aisles are visited such that the largest gap between pairs of required locations or cross aisles and required locations is not traveled. Any additional required location in  $R$  can clearly only decrease the largest gap in the corresponding aisle so that the distance traveled within this aisle can only increase. The relation  $c_{b_1} \leq c_{b_2}$  then follows with similar arguments as for the midpoint strategy.

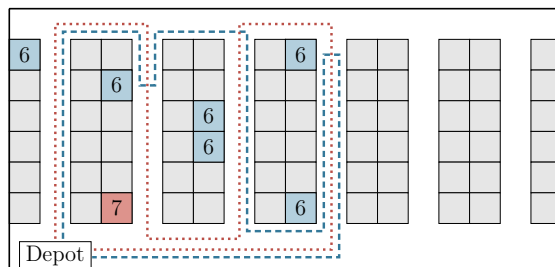

**Figure EC.2** Picker routes for both interpretations of the composite strategy and batches  $b_1 = \{6\}$  (in blue) and  $b_2 = \{6, 7\}$  (in red),  $c_{b_1} = 48$ ,  $c_{b_2} = 46$

**Combined** The combined strategy allows visiting aisles either in return fashion or by complete traversal. It chooses the distance-minimal picker route using only these two in-aisle visits. Now, any additional required location in  $R$  does not impact the distance of a complete traversal and can only increase the distance traveled in a return visit of the corresponding aisle. Thus,  $c_{b_1} \leq c_{b_2}$  obviously holds for the combined strategy.

**Mixed** The mixed strategy allows visiting aisles either in return or in midpoint fashion choosing for each aisle the shorter of the two possibilities. Any additional required location within an aisle can only increase the distance traveled for visiting this aisle in both return and midpoint fashion. Then,  $c_{b_1} \leq c_{b_2}$  follows by the same arguments as for the midpoint and the largest gap strategies.

**Optimal** Recall that the optimal strategy follows a distance-minimal route that is equivalent to an optimal TSP tour over the required locations. Because the distances between all storage locations satisfy the triangle inequality, any additional required location in  $R$  can never decrease the length of an optimal TSP tour and we immediately have  $c_{b_1} \leq c_{b_2}$ .  $\square$

### Appendix C: Non-Monotonicity of Composite Routing Strategy

Figure EC.2 provides a small example showing that the composite strategy is not monotone, for neither of the interpretations by Petersen (1995) and by Roodbergen (2001) and Scholz and Wäscher (2017). For batch  $b_1$  comprising only order 6, both variants of the composite strategy result in a picker route of length  $c_{b_1} = 48$  depicted with a blue dashed line. For batch  $b_2 = \{6, 7\}$ , the corresponding picker route of both variants is indicated with a red dotted line and has a length of  $c_{b_2} = 46$ . Because  $b_1 \subseteq b_2$  but  $c_{b_1} > c_{b_2}$ , the composite strategy is obviously not monotone.

### Appendix D: Algorithm Design Choices

In the following, we give some details on additional design choices made in our BPC algorithm. We also present the specific values used for the parameters of the algorithm. These values were obtained in pretests on a small subset of the instances used in our main computational study.

*Initialization of RMP.* We initialize the RMP with a subset  $\Omega'$  of feasible batches obtained from a variant of the well-known savings heuristic by Clarke and Wright (1964). The heuristic first calculates for each pair of customer orders, the savings in travel distance if the customer orders are picked in one picking route instead of two individual routes. Starting with individual batches for each order, the heuristic then iterates over the savings in non-decreasing order and combines the current batches of the two corresponding customer orders to one larger batch, if feasible. To randomize the heuristic, the savings are multiplied with a number

randomly drawn from the interval  $[0.85, 1.15]$ . The heuristic is run several times and all batches contained in any of the heuristic solutions are added to  $\Omega'$ .

We further initialize the RMP with a lower bound on the number of pickers needed by adding the corresponding inequality (6) for  $S = O$  using  $\kappa^3(O)$ . Notice that in this case, no additional resource is needed in the labeling algorithm because the dual price  $\rho_O$  has to be subtracted once from all batches.

*Pricing Problem Solution.* In principle, any sorting of the orders can be used when constructing graph  $G$  for the SPPRC representation of the pricing problem. The sorting, however, has a substantial impact on the solution time of the pricing problem. In our BPC, the orders are sorted non-increasingly by relative profit  $\pi_o/q_o$  or, after branching, by a generalized version that takes the maximum relative profit multiplied by the maximum capacity consumption of the feasible combinations of an order group. With this sorting, negative reduced-cost batches can often be identified early in the labeling allowing an early termination. Moreover, labels with positive reduced costs tend to be discarded early because of the small-valued completion bounds resulting from this sorting.

*Cutting and Branching Strategy.* In the BPC, branching on the number of pickers, if fractional, is given priority over cutting. Furthermore, cuts are only separated in the root node or in its two child nodes if they result from a branching on the number of pickers.

The overall separation strategy is to first separate CCs with the greedy and connected-component heuristics. If they fail to identify any violated cuts, we separate SRCs by enumeration. The computationally costly MIP-based separation of CCs is only invoked when the other separation procedures fail. Moreover, we set a hard time limit of five seconds for each call to the MIP.

To contain the size of the B&B tree, we apply strong branching at the second stage of the branching scheme. The strong branching procedure considers a candidate set of order pairs  $(o_1, o_2)$  with fractional  $f_{o_1 o_2}$ . For each pair, a rough evaluation of both child nodes is performed solving only the RMP with the corresponding branching constraint without any column generation. The decision on which candidate branching is performed is taken according to the product rule (Achterberg 2007). At the root node, the maximum size of the candidate set is 25 and we decrease the size by two for each level of the B&B tree. We select the pairs  $(o_1, o_2)$  for which  $f_{o_1 o_2}$  is closest to 0.5 to enter the candidate set.

## Appendix E: Benchmark Instances

In the following, we provide a description of the considered benchmark sets by Henn and Wäscher (2012) (H&W), Muter and Öncan (2015) (M&Ö and M&Ö-ext), and Žulj, Kramer, and Schneider (2018) (ZKS) as well as the newly introduced instances (W&G-g and W&G-u). The same warehouse layouts are shared by the H&W and ZKS instances and by the M&Ö, M&Ö-ext, W&G-g, and W&G-u instances, respectively.

The H&W and ZKS benchmarks consider a rectangular single-block warehouse with 10 parallel picking aisles and 45 storage locations on both sides of each aisle. Each storage location has a length of one unit. Picking an item takes place in the vertical middle of the corresponding storage location and does not require any horizontal distance to be traveled. When entering/leaving an aisle from/to one of the cross aisles, the order picker moves one unit in vertical direction. Thus, a complete traversal of a picking aisle amounts to 47 units. The depot is located on the front cross aisle in front of the leftmost aisle. There is no additional distance to

enter/leave the depot to/from the front cross aisle. The distance between two consecutive picking aisles is 5 units.

The  $M\ddot{O}$ ,  $M\ddot{O}$ -ext,  $W\&G$ -g, and  $W\&G$ -u benchmark sets assume a single-block layout with 10 parallel picking aisles, 10 storage locations of length one on both sides of each aisle, and a single depot located on the front cross aisle in front of the leftmost aisle. Picking is performed as in the  $H\&W$  and  $ZKS$  instances. The horizontal distance between two consecutive picking aisles is 2.4 units. Unfortunately, we were not able to get any information about the distances needed to enter/leave an aisle from/to one of the cross aisles or to enter/leave the depot for the  $M\ddot{O}$  instances. We interpreted these distances as specified for the  $H\&W$  and  $ZKS$  instances also for the benchmark sets  $M\ddot{O}$ ,  $M\ddot{O}$ -ext,  $W\&G$ -g, and  $W\&G$ -u.

The  $H\&W$  benchmark considers two different scenarios with respect to storage assignment: class-based demand (CBD) and uniformly distributed demand (UDD). For CBD, items are assigned to storage locations according to their demand frequencies: high-demand items in the leftmost aisle, medium-demand items in subsequent aisles, and low-demand items in the right half of the warehouse. For UDD, items are randomly assigned to storage locations. [Henn and Wäscher \(2012\)](#) originally introduced separate instances for strategies traversal and largest gap resulting in the four subclasses CBD/traversal, CBD/largest gap, UDD/traversal and UDD/largest gap. Obviously, all instances can be used for all routing strategies. For all subclasses, there are 40 instances for each combination of capacity  $Q \in \{30, 45, 60, 75\}$  and number of orders  $n \in \{20, 30, \dots, 100\}$ . The number of items per order is uniformly distributed in  $\{5, \dots, 25\}$ . The complete benchmark comprises 5760 instances.

The  $ZKS$  benchmark comprises groups of 10 instances for the  $(n, Q)$ -pairs  $(200, 6)$ ,  $(200, 9)$ ,  $(200, 12)$ ,  $(200, 15)$ ,  $(300, 6)$ ,  $(400, 6)$ ,  $(500, 6)$ , and  $(600, 6)$  and order sizes uniformly distributed in  $\{1, \dots, 5\}$ .

The original  $M\ddot{O}$  benchmark consists of instance groups characterized by capacity  $Q \in \{24, 36, 48\}$  and number of orders  $n \in \{20, 30, \dots, 100\}$ . The sizes of the orders are randomly drawn from  $\{2, \dots, 10\}$  and the individual items are randomly distributed in the warehouse. Each group comprises 10 instances resulting in a total of 270 instances. We additionally consider the  $M\ddot{O}$  instances with larger values for the capacities, namely  $Q \in \{60, 72\}$ , referred to as benchmark set  $M\ddot{O}$ -ext which comprises another 180 instances.

The  $W\&G$ -g benchmark comprises groups of 10 instances where each group is characterized by a capacity  $Q \in \{24, 36, 48, 60, 72\}$  and a number of orders  $n \in \{125, 150, \dots, 250\}$ . The order sizes are randomly drawn from  $\{2, \dots, 10\}$  and the individual items are randomly distributed in the warehouse. The benchmark comprises a total of 300 instances.

The  $W\&G$ -u benchmark comprises groups of 10 instances where each group is characterized by a capacity  $Q \in \{24, 36, 48, 60, 72\}$  and a number of orders  $n \in \{100, 150, 200, 250\}$ . The orders have a uniform size of six items and the individual items are randomly distributed in the warehouse. The benchmark comprises a total of 200 instances.

## Appendix F: Detailed Computational Results

In this section, we report detailed computational results of our BPC algorithm and the BPC-based heuristics for the six considered routing strategies traversal, return, midpoint, largest gap, combined and optimal. We report results for the three benchmark sets from the literature by [Muter and Öncan \(2015\)](#) ( $M\ddot{O}$ ), [Henn](#)

and Wäscher (2012) (H&W), and Žulj, Kramer, and Schneider (2018) (ZKS). Furthermore, we report results for the extended Muter and Öncan (2015) instances with enlarged capacities (M&Ö-ext) and the newly created benchmark instances with general (W&G-g) and uniform (W&G-u) order weights. Finally, we provide a comparison of the routing strategies in terms of total traveled distances. Instance-by-instance results of our main BPC and the two BPC-based heuristics together with the best-known solutions (BKS) are provided at <https://logistik.wiwi.uni-kl.de/obp-bpc-detailedresults>.

### **F.1. Summary Results of BPC Algorithm**

Tables EC.1–EC.6 provide summary results for the six benchmark sets and all routing strategies aggregated by capacity  $Q$  and number of orders  $n$ . They report the number of instances solved to optimality within the time limit of one hour ( $Opt$ ) and the average solution time in seconds ( $t[s]$ ).

**Table EC.1** Summary results of our BPC algorithm for the M&O instances

| $Q$   | $n$      | Inst | Traversal |        | Return |        | Midpoint |        | Largest gap |        | Combined |        | Optimal |        |
|-------|----------|------|-----------|--------|--------|--------|----------|--------|-------------|--------|----------|--------|---------|--------|
|       |          |      | Opt       | t[s]   | Opt    | t[s]   | Opt      | t[s]   | Opt         | t[s]   | Opt      | t[s]   | Opt     | t[s]   |
| 24    | 20       | 10   | 10        | 0.2    | 10     | 0.1    | 10       | 0.0    | 10          | 0.1    | 10       | 0.1    | 10      | 0.1    |
|       | 30       | 10   | 10        | 0.7    | 10     | 1.1    | 10       | 0.4    | 10          | 0.9    | 10       | 0.4    | 10      | 0.7    |
|       | 40       | 10   | 10        | 8.6    | 10     | 1.9    | 10       | 1.6    | 10          | 2.3    | 10       | 3.7    | 10      | 2.2    |
|       | 50       | 10   | 10        | 14.8   | 10     | 13.0   | 10       | 3.0    | 10          | 8.1    | 10       | 9.2    | 10      | 6.3    |
|       | 60       | 10   | 10        | 11.5   | 10     | 3.0    | 10       | 5.2    | 10          | 12.5   | 10       | 8.3    | 10      | 7.1    |
|       | 70       | 10   | 10        | 37.9   | 10     | 73.8   | 10       | 17.3   | 10          | 53.3   | 10       | 118.5  | 10      | 59.3   |
|       | 80       | 10   | 10        | 392.4  | 10     | 128.3  | 10       | 39.2   | 10          | 69.5   | 10       | 51.0   | 10      | 40.5   |
|       | 90       | 10   | 8         | 1097.6 | 10     | 570.1  | 10       | 269.3  | 9           | 457.4  | 10       | 406.2  | 9       | 557.6  |
|       | 100      | 10   | 10        | 493.0  | 10     | 274.8  | 9        | 582.6  | 10          | 186.5  | 10       | 376.6  | 9       | 508.3  |
|       | Subtotal | 90   | 88        | 228.5  | 90     | 118.5  | 89       | 102.1  | 89          | 87.8   | 90       | 108.2  | 88      | 131.3  |
| 36    | 20       | 10   | 10        | 2.1    | 10     | 0.6    | 10       | 0.3    | 10          | 0.2    | 10       | 0.4    | 10      | 0.4    |
|       | 30       | 10   | 10        | 25.4   | 10     | 5.6    | 10       | 2.5    | 10          | 3.2    | 10       | 2.8    | 10      | 6.5    |
|       | 40       | 10   | 10        | 43.5   | 10     | 30.8   | 10       | 7.2    | 10          | 14.7   | 10       | 26.1   | 10      | 29.7   |
|       | 50       | 10   | 9         | 649.2  | 10     | 59.3   | 10       | 27.1   | 10          | 116.2  | 10       | 163.2  | 10      | 59.9   |
|       | 60       | 10   | 10        | 805.8  | 10     | 137.9  | 10       | 85.1   | 10          | 71.5   | 10       | 272.1  | 10      | 156.3  |
|       | 70       | 10   | 8         | 1125.5 | 10     | 791.9  | 10       | 160.4  | 10          | 373.2  | 10       | 737.4  | 10      | 359.3  |
|       | 80       | 10   | 5         | 2141.7 | 8      | 1829.8 | 10       | 989.0  | 10          | 929.4  | 8        | 1977.1 | 8       | 1755.7 |
|       | 90       | 10   | 6         | 2295.7 | 10     | 1098.1 | 10       | 1402.3 | 7           | 1941.4 | 9        | 1425.8 | 7       | 1969.3 |
|       | 100      | 10   | 4         | 2394.8 | 5      | 2971.8 | 8        | 2107.6 | 3           | 2977.9 | 4        | 3150.5 | 4       | 2881.0 |
|       | Subtotal | 90   | 72        | 1053.7 | 83     | 769.5  | 88       | 531.3  | 80          | 714.2  | 81       | 861.7  | 79      | 802.0  |
| 48    | 20       | 10   | 10        | 3.6    | 10     | 1.2    | 10       | 0.5    | 10          | 1.0    | 10       | 1.4    | 10      | 0.9    |
|       | 30       | 10   | 10        | 146.5  | 10     | 21.8   | 10       | 46.4   | 10          | 35.6   | 10       | 49.1   | 10      | 96.5   |
|       | 40       | 10   | 9         | 612.7  | 10     | 32.0   | 10       | 57.3   | 10          | 47.8   | 10       | 41.3   | 10      | 134.2  |
|       | 50       | 10   | 6         | 2285.0 | 10     | 613.0  | 10       | 187.0  | 10          | 402.9  | 9        | 1202.6 | 9       | 1030.0 |
|       | 60       | 10   | 6         | 1677.9 | 10     | 363.6  | 10       | 268.6  | 10          | 589.4  | 10       | 539.0  | 10      | 560.2  |
|       | 70       | 10   | 3         | 2951.5 | 5      | 2208.9 | 6        | 2286.7 | 5           | 2254.9 | 7        | 1746.4 | 7       | 1887.1 |
|       | 80       | 10   | 1         | 3316.5 | 5      | 2381.6 | 7        | 2197.2 | 5           | 3031.7 | 7        | 2345.8 | 7       | 2471.7 |
|       | 90       | 10   | 1         | 3276.8 | 1      | 3387.3 | 3        | 3160.0 | 3           | 2828.2 | 0        | 3600.0 | 1       | 3574.5 |
|       | 100      | 10   | 2         | 3039.8 | 3      | 3140.0 | 1        | 3387.8 | 3           | 3004.0 | 0        | 3600.0 | 1       | 3305.2 |
|       | Subtotal | 90   | 48        | 1923.4 | 64     | 1349.9 | 67       | 1287.9 | 66          | 1355.1 | 63       | 1458.4 | 65      | 1451.2 |
| Total | 270      | 208  | 1068.5    | 237    | 746.0  | 244    | 640.4    | 235    | 719.0       | 234    | 809.4    | 232    | 794.8   |        |

**Table EC.2** Summary results of our BPC algorithm for the H&W instances

| $Q$   | $n$      | Inst | Traversal |        | Return |        | Midpoint |        | Largest gap |        | Combined |        | Optimal |        |
|-------|----------|------|-----------|--------|--------|--------|----------|--------|-------------|--------|----------|--------|---------|--------|
|       |          |      | Opt       | t[s]   | Opt    | t[s]   | Opt      | t[s]   | Opt         | t[s]   | Opt      | t[s]   | Opt     | t[s]   |
| 30    | 20       | 160  | 160       | 0.0    | 160    | 0.0    | 160      | 0.0    | 160         | 0.0    | 160      | 0.0    | 160     | 0.0    |
|       | 30       | 160  | 160       | 0.0    | 160    | 0.0    | 160      | 0.0    | 160         | 0.0    | 160      | 0.0    | 160     | 0.0    |
|       | 40       | 160  | 160       | 0.1    | 160    | 0.1    | 160      | 0.0    | 160         | 0.0    | 160      | 0.0    | 160     | 0.0    |
|       | 50       | 160  | 160       | 0.1    | 160    | 0.0    | 160      | 0.0    | 160         | 0.0    | 160      | 0.0    | 160     | 0.0    |
|       | 60       | 160  | 158       | 45.2   | 160    | 0.1    | 160      | 0.1    | 160         | 0.1    | 160      | 0.1    | 160     | 0.1    |
|       | 70       | 160  | 158       | 45.2   | 160    | 0.2    | 160      | 0.1    | 160         | 0.1    | 160      | 0.2    | 160     | 0.1    |
|       | 80       | 160  | 155       | 129.2  | 160    | 0.2    | 160      | 0.1    | 160         | 0.2    | 159      | 22.9   | 160     | 13.9   |
|       | 90       | 160  | 154       | 157.5  | 160    | 0.2    | 160      | 0.1    | 160         | 0.2    | 159      | 22.8   | 160     | 0.2    |
|       | 100      | 160  | 155       | 123.1  | 160    | 0.3    | 160      | 0.1    | 160         | 0.3    | 160      | 0.3    | 160     | 0.4    |
|       | Subtotal | 1440 | 1420      | 55.6   | 1440   | 0.1    | 1440     | 0.1    | 1440        | 0.1    | 1438     | 5.2    | 1440    | 1.6    |
| 45    | 20       | 160  | 160       | 0.2    | 160    | 0.1    | 160      | 0.1    | 160         | 0.1    | 160      | 0.1    | 160     | 0.1    |
|       | 30       | 160  | 160       | 11.0   | 160    | 0.8    | 160      | 0.4    | 160         | 0.7    | 160      | 1.0    | 160     | 0.5    |
|       | 40       | 160  | 160       | 34.1   | 160    | 1.6    | 160      | 1.1    | 160         | 2.6    | 160      | 1.7    | 160     | 2.1    |
|       | 50       | 160  | 157       | 113.5  | 160    | 6.6    | 160      | 2.3    | 159         | 24.5   | 160      | 17.2   | 160     | 5.7    |
|       | 60       | 160  | 152       | 221.5  | 159    | 35.2   | 160      | 6.9    | 160         | 7.9    | 159      | 81.6   | 160     | 15.7   |
|       | 70       | 160  | 150       | 334.3  | 158    | 80.2   | 160      | 10.7   | 160         | 24.9   | 158      | 105.2  | 159     | 56.4   |
|       | 80       | 160  | 145       | 491.4  | 156    | 146.5  | 160      | 22.0   | 160         | 32.1   | 157      | 157.0  | 157     | 142.6  |
|       | 90       | 160  | 136       | 745.1  | 158    | 178.9  | 160      | 37.2   | 159         | 78.9   | 157      | 176.0  | 157     | 140.7  |
|       | 100      | 160  | 132       | 818.8  | 148    | 432.2  | 158      | 105.9  | 156         | 182.5  | 148      | 396.6  | 151     | 346.6  |
|       | Subtotal | 1440 | 1352      | 307.8  | 1419   | 98.0   | 1438     | 20.7   | 1434        | 39.3   | 1419     | 104.1  | 1424    | 78.9   |
| 60    | 20       | 160  | 160       | 1.3    | 160    | 0.3    | 160      | 0.2    | 160         | 0.2    | 160      | 0.3    | 160     | 0.3    |
|       | 30       | 160  | 159       | 49.5   | 160    | 1.9    | 160      | 1.9    | 160         | 1.9    | 160      | 2.2    | 160     | 2.0    |
|       | 40       | 160  | 149       | 325.4  | 160    | 8.0    | 160      | 5.0    | 160         | 8.3    | 160      | 12.9   | 160     | 11.9   |
|       | 50       | 160  | 138       | 657.8  | 159    | 53.5   | 160      | 25.0   | 160         | 45.2   | 158      | 70.5   | 159     | 64.7   |
|       | 60       | 160  | 130       | 932.1  | 159    | 132.8  | 158      | 127.6  | 159         | 142.9  | 157      | 212.4  | 159     | 130.8  |
|       | 70       | 160  | 102       | 1503.0 | 155    | 333.3  | 153      | 283.7  | 154         | 323.7  | 153      | 411.9  | 152     | 403.6  |
|       | 80       | 160  | 79        | 2031.4 | 146    | 626.3  | 147      | 501.5  | 142         | 693.6  | 147      | 671.5  | 135     | 951.9  |
|       | 90       | 160  | 64        | 2432.1 | 134    | 890.4  | 147      | 608.5  | 143         | 765.3  | 137      | 1018.8 | 141     | 996.3  |
|       | 100      | 160  | 39        | 2898.1 | 123    | 1381.1 | 139      | 932.1  | 136         | 1152.7 | 123      | 1456.0 | 120     | 1542.8 |
|       | Subtotal | 1440 | 1020      | 1203.4 | 1356   | 380.8  | 1384     | 276.2  | 1374        | 348.2  | 1355     | 428.5  | 1346    | 456.0  |
| 75    | 20       | 160  | 160       | 36.8   | 160    | 0.4    | 160      | 0.3    | 160         | 0.5    | 160      | 0.8    | 160     | 0.9    |
|       | 30       | 160  | 140       | 598.3  | 160    | 4.8    | 160      | 3.7    | 160         | 4.0    | 160      | 5.9    | 160     | 5.4    |
|       | 40       | 160  | 130       | 881.6  | 160    | 28.3   | 160      | 18.8   | 160         | 26.0   | 160      | 29.4   | 160     | 36.1   |
|       | 50       | 160  | 93        | 1731.2 | 160    | 139.2  | 160      | 100.4  | 159         | 157.5  | 158      | 153.5  | 160     | 162.9  |
|       | 60       | 160  | 83        | 2031.8 | 155    | 360.1  | 157      | 304.6  | 155         | 382.2  | 155      | 375.6  | 157     | 457.1  |
|       | 70       | 160  | 50        | 2633.9 | 152    | 721.9  | 144      | 778.8  | 143         | 892.4  | 139      | 898.9  | 144     | 878.2  |
|       | 80       | 160  | 36        | 2966.8 | 122    | 1473.2 | 134      | 1088.1 | 125         | 1426.8 | 129      | 1364.3 | 108     | 1835.8 |
|       | 90       | 160  | 15        | 3362.6 | 111    | 1901.0 | 109      | 1857.3 | 101         | 2036.9 | 111      | 1854.2 | 98      | 2099.8 |
|       | 100      | 160  | 13        | 3399.2 | 67     | 2758.6 | 78       | 2441.8 | 65          | 2712.8 | 77       | 2499.2 | 57      | 2838.7 |
|       | Subtotal | 1440 | 720       | 1960.2 | 1247   | 820.8  | 1262     | 732.6  | 1228        | 848.8  | 1249     | 798.0  | 1204    | 923.9  |
| Total |          | 5760 | 4512      | 881.8  | 5462   | 325.0  | 5524     | 257.4  | 5476        | 309.1  | 5461     | 333.9  | 5414    | 365.1  |

**Table EC.3** Summary results of our BPC algorithm for the ZKS instances

| $Q$   | $n$ | Inst | Traversal |        | Return |        | Midpoint |        | Largest gap |        | Combined |        | Optimal |        |
|-------|-----|------|-----------|--------|--------|--------|----------|--------|-------------|--------|----------|--------|---------|--------|
|       |     |      | Opt       | t[s]   | Opt    | t[s]   | Opt      | t[s]   | Opt         | t[s]   | Opt      | t[s]   | Opt     | t[s]   |
| 6     | 200 | 10   | 2         | 2884.8 | 6      | 1648.2 | 2        | 2978.5 | 4           | 2172.0 | 4        | 2513.2 | 3       | 2524.3 |
|       | 300 | 10   | 1         | 3253.7 | 2      | 3011.2 | 1        | 3250.6 | 0           | 3600.0 | 1        | 3243.9 | 1       | 3257.2 |
|       | 400 | 10   | 1         | 3259.1 | 0      | 3600.0 | 0        | 3600.0 | 1           | 3265.4 | 0        | 3600.0 | 0       | 3600.0 |
|       | 500 | 10   | 0         | 3600.0 | 0      | 3600.0 | 0        | 3600.0 | 0           | 3600.0 | 1        | 3384.2 | 0       | 3600.0 |
|       | 600 | 10   | 1         | 3581.2 | 0      | 3600.0 | 0        | 3600.0 | 0           | 3600.0 | 0        | 3600.0 | 0       | 3600.0 |
| 9     | 200 | 10   | 0         | 3600.0 | 1      | 3344.2 | 0        | 3600.0 | 0           | 3600.0 | 3        | 2675.6 | 2       | 2991.5 |
| 12    | 200 | 10   | 0         | 3600.0 | 0      | 3600.0 | 0        | 3600.0 | 0           | 3600.0 | 0        | 3600.0 | 0       | 3600.0 |
| 15    | 200 | 10   | 0         | 3600.0 | 1      | 3510.9 | 0        | 3600.0 | 0           | 3600.0 | 0        | 3600.0 | 0       | 3600.0 |
| Total |     | 80   | 5         | 3422.4 | 10     | 3239.3 | 3        | 3478.6 | 5           | 3379.7 | 9        | 3277.1 | 6       | 3346.6 |

**Table EC.4** Summary results of our BPC algorithm for the M&O-ext instances

| $Q$   | $n$      | Inst | Traversal |        | Return |        | Midpoint |        | Largest gap |        | Combined |        | Optimal |        |
|-------|----------|------|-----------|--------|--------|--------|----------|--------|-------------|--------|----------|--------|---------|--------|
|       |          |      | Opt       | t[s]   | Opt    | t[s]   | Opt      | t[s]   | Opt         | t[s]   | Opt      | t[s]   | Opt     | t[s]   |
| 60    | 20       | 10   | 10        | 13.3   | 10     | 1.2    | 10       | 2.3    | 10          | 1.7    | 10       | 4.5    | 10      | 7.7    |
|       | 30       | 10   | 10        | 330.1  | 10     | 99.2   | 10       | 38.6   | 10          | 60.6   | 10       | 215.0  | 10      | 444.3  |
|       | 40       | 10   | 6         | 1590.0 | 10     | 139.1  | 10       | 81.7   | 10          | 169.9  | 10       | 294.5  | 9       | 745.6  |
|       | 50       | 10   | 7         | 1791.3 | 9      | 535.5  | 10       | 850.1  | 10          | 557.8  | 8        | 1387.5 | 8       | 1112.2 |
|       | 60       | 10   | 4         | 2596.3 | 5      | 2358.5 | 6        | 1760.1 | 6           | 2339.4 | 5        | 2389.4 | 6       | 2403.0 |
|       | 70       | 10   | 2         | 3090.8 | 7      | 1685.2 | 3        | 2823.2 | 3           | 3145.2 | 5        | 2645.1 | 2       | 3220.8 |
|       | 80       | 10   | 0         | 3600.0 | 1      | 3371.3 | 2        | 3054.8 | 0           | 3600.0 | 2        | 3107.1 | 0       | 3600.0 |
|       | 90       | 10   | 1         | 3262.8 | 2      | 3063.7 | 1        | 3357.8 | 0           | 3600.0 | 1        | 3317.4 | 1       | 3402.8 |
|       | 100      | 10   | 0         | 3600.0 | 0      | 3600.0 | 0        | 3600.0 | 0           | 3600.0 | 0        | 3600.0 | 0       | 3600.0 |
|       | Subtotal |      | 90        | 40     | 2208.3 | 54     | 1650.4   | 52     | 1729.8      | 49     | 1897.2   | 51     | 1884.5  | 46     |
| 72    | 20       | 10   | 10        | 3.8    | 10     | 4.4    | 10       | 5.0    | 10          | 7.0    | 10       | 9.8    | 10      | 29.8   |
|       | 30       | 10   | 10        | 368.8  | 10     | 74.6   | 10       | 226.4  | 10          | 249.0  | 10       | 195.5  | 10      | 1010.6 |
|       | 40       | 10   | 8         | 841.6  | 10     | 980.8  | 9        | 509.8  | 10          | 717.2  | 9        | 901.6  | 10      | 487.2  |
|       | 50       | 10   | 4         | 2728.1 | 6      | 1760.4 | 8        | 1525.1 | 7           | 1798.4 | 6        | 1692.2 | 8       | 1417.6 |
|       | 60       | 10   | 6         | 2141.7 | 3      | 2863.8 | 5        | 2326.9 | 2           | 3272.1 | 2        | 3074.3 | 6       | 2216.9 |
|       | 70       | 10   | 2         | 2903.7 | 2      | 3227.4 | 2        | 3187.4 | 0           | 3600.0 | 3        | 2825.8 | 0       | 3600.0 |
|       | 80       | 10   | 0         | 3600.0 | 1      | 3462.0 | 1        | 3529.1 | 0           | 3600.0 | 0        | 3600.0 | 0       | 3600.0 |
|       | 90       | 10   | 1         | 3356.4 | 0      | 3600.0 | 0        | 3600.0 | 0           | 3600.0 | 0        | 3600.0 | 0       | 3600.0 |
|       | 100      | 10   | 0         | 3600.0 | 0      | 3600.0 | 0        | 3600.0 | 0           | 3600.0 | 1        | 3316.4 | 0       | 3600.0 |
|       | Subtotal |      | 90        | 41     | 2171.6 | 42     | 2174.8   | 45     | 2056.6      | 39     | 2271.5   | 41     | 2135.1  | 44     |
| Total |          | 180  | 81        | 2189.9 | 96     | 1912.6 | 97       | 1893.2 | 88          | 2084.4 | 92       | 2009.8 | 90      | 2116.6 |

**Table EC.5** Summary results of our BPC algorithm for the W&G-g instances

| $Q$   | $n$      | Inst | Traversal |        | Return |        | Midpoint |        | Largest gap |        | Combined |        | Optimal |        |
|-------|----------|------|-----------|--------|--------|--------|----------|--------|-------------|--------|----------|--------|---------|--------|
|       |          |      | Opt       | t[s]   | Opt    | t[s]   | Opt      | t[s]   | Opt         | t[s]   | Opt      | t[s]   | Opt     | t[s]   |
| 24    | 125      | 10   | 5         | 2259.2 | 8      | 1423.7 | 6        | 1694.5 | 7           | 1557.1 | 7        | 1974.4 | 7       | 1730.9 |
|       | 150      | 10   | 4         | 2564.5 | 7      | 1845.8 | 7        | 2458.0 | 7           | 2043.3 | 5        | 2624.6 | 5       | 2410.4 |
|       | 175      | 10   | 3         | 2733.7 | 1      | 3508.7 | 5        | 3076.1 | 3           | 3169.5 | 3        | 3164.7 | 4       | 2671.1 |
|       | 200      | 10   | 0         | 3600.0 | 0      | 3600.0 | 1        | 3484.8 | 0           | 3600.0 | 0        | 3600.0 | 0       | 3600.0 |
|       | 225      | 10   | 0         | 3600.0 | 0      | 3600.0 | 0        | 3600.0 | 0           | 3600.0 | 0        | 3600.0 | 0       | 3600.0 |
|       | 250      | 10   | 0         | 3600.0 | 0      | 3600.0 | 0        | 3600.0 | 0           | 3600.0 | 1        | 3576.3 | 0       | 3600.0 |
|       | Subtotal | 60   | 12        | 3059.6 | 16     | 2929.7 | 19       | 2985.6 | 17          | 2928.3 | 16       | 3090.0 | 16      | 2935.4 |
| 36    | 125      | 10   | 0         | 3600.0 | 1      | 3489.9 | 4        | 2985.8 | 1           | 3367.5 | 1        | 3518.5 | 0       | 3600.0 |
|       | 150      | 10   | 0         | 3600.0 | 0      | 3600.0 | 0        | 3600.0 | 0           | 3600.0 | 0        | 3600.0 | 0       | 3600.0 |
|       | 175      | 10   | 0         | 3600.0 | 0      | 3600.0 | 0        | 3600.0 | 0           | 3600.0 | 0        | 3600.0 | 0       | 3600.0 |
|       | 200      | 10   | 0         | 3600.0 | 0      | 3600.0 | 0        | 3600.0 | 0           | 3600.0 | 0        | 3600.0 | 0       | 3600.0 |
|       | 225      | 10   | 0         | 3600.0 | 0      | 3600.0 | 0        | 3600.0 | 0           | 3600.0 | 0        | 3600.0 | 0       | 3600.0 |
|       | 250      | 10   | 0         | 3600.0 | 0      | 3600.0 | 0        | 3600.0 | 0           | 3600.0 | 0        | 3600.0 | 0       | 3600.0 |
|       | Subtotal | 60   | 0         | 3600.0 | 1      | 3581.6 | 4        | 3497.6 | 1           | 3561.3 | 1        | 3586.4 | 0       | 3600.0 |
| 48    | 125      | 10   | 1         | 3445.3 | 0      | 3600.0 | 1        | 3561.2 | 0           | 3600.0 | 0        | 3600.0 | 0       | 3600.0 |
|       | 150      | 10   | 0         | 3600.0 | 0      | 3600.0 | 0        | 3600.0 | 0           | 3600.0 | 0        | 3600.0 | 0       | 3600.0 |
|       | 175      | 10   | 0         | 3600.0 | 0      | 3600.0 | 0        | 3600.0 | 0           | 3600.0 | 0        | 3600.0 | 0       | 3600.0 |
|       | 200      | 10   | 0         | 3600.0 | 0      | 3600.0 | 0        | 3600.0 | 0           | 3600.0 | 0        | 3600.0 | 0       | 3600.0 |
|       | 225      | 10   | 0         | 3600.0 | 0      | 3600.0 | 0        | 3600.0 | 0           | 3600.0 | 0        | 3600.0 | 0       | 3600.0 |
|       | 250      | 10   | 0         | 3600.0 | 0      | 3600.0 | 0        | 3600.0 | 0           | 3600.0 | 0        | 3600.0 | 0       | 3600.0 |
|       | Subtotal | 60   | 1         | 3574.2 | 0      | 3600.0 | 1        | 3593.5 | 0           | 3600.0 | 0        | 3600.0 | 0       | 3600.0 |
| 60    | 125      | 10   | 0         | 3600.0 | 0      | 3600.0 | 0        | 3600.0 | 0           | 3600.0 | 0        | 3600.0 | 0       | 3600.0 |
|       | 150      | 10   | 0         | 3600.0 | 0      | 3600.0 | 0        | 3600.0 | 0           | 3600.0 | 0        | 3600.0 | 0       | 3600.0 |
|       | 175      | 10   | 0         | 3600.0 | 0      | 3600.0 | 0        | 3600.0 | 0           | 3600.0 | 0        | 3600.0 | 0       | 3600.0 |
|       | 200      | 10   | 0         | 3600.0 | 0      | 3600.0 | 0        | 3600.0 | 0           | 3600.0 | 0        | 3600.0 | 0       | 3600.0 |
|       | 225      | 10   | 0         | 3600.0 | 0      | 3600.0 | 0        | 3600.0 | 0           | 3600.0 | 0        | 3600.0 | 0       | 3600.0 |
|       | 250      | 10   | 0         | 3600.0 | 0      | 3600.0 | 0        | 3600.0 | 0           | 3600.0 | 0        | 3600.0 | 0       | 3600.0 |
|       | Subtotal | 60   | 0         | 3600.0 | 0      | 3600.0 | 0        | 3600.0 | 0           | 3600.0 | 0        | 3600.0 | 0       | 3600.0 |
| 72    | 125      | 10   | 0         | 3600.0 | 0      | 3600.0 | 0        | 3600.0 | 0           | 3600.0 | 0        | 3600.0 | 0       | 3600.0 |
|       | 150      | 10   | 0         | 3600.0 | 0      | 3600.0 | 0        | 3600.0 | 0           | 3600.0 | 0        | 3600.0 | 0       | 3600.0 |
|       | 175      | 10   | 0         | 3600.0 | 0      | 3600.0 | 0        | 3600.0 | 0           | 3600.0 | 0        | 3600.0 | 0       | 3600.0 |
|       | 200      | 10   | 0         | 3600.0 | 0      | 3600.0 | 0        | 3600.0 | 0           | 3600.0 | 0        | 3600.0 | 0       | 3600.0 |
|       | 225      | 10   | 0         | 3600.0 | 0      | 3600.0 | 0        | 3600.0 | 0           | 3600.0 | 0        | 3600.0 | 0       | 3600.0 |
|       | 250      | 10   | 0         | 3600.0 | 0      | 3600.0 | 0        | 3600.0 | 0           | 3600.0 | 0        | 3600.0 | 0       | 3600.0 |
|       | Subtotal | 60   | 0         | 3600.0 | 0      | 3600.0 | 0        | 3600.0 | 0           | 3600.0 | 0        | 3600.0 | 0       | 3600.0 |
| Total | 300      | 13   | 3486.8    | 17     | 3462.3 | 24     | 3455.3   | 18     | 3457.9      | 17     | 3495.3   | 16     | 3467.1  |        |

**Table EC.6** Summary results of our BPC algorithm for the W&G-u instances

| $Q$      | $n$ | Inst | Traversal |        | Return |        | Midpoint |        | Largest gap |        | Combined |        | Optimal |        |
|----------|-----|------|-----------|--------|--------|--------|----------|--------|-------------|--------|----------|--------|---------|--------|
|          |     |      | Opt       | t[s]   | Opt    | t[s]   | Opt      | t[s]   | Opt         | t[s]   | Opt      | t[s]   | Opt     | t[s]   |
| 24       | 100 | 10   | 10        | 77.8   | 10     | 34.0   | 10       | 37.8   | 10          | 24.5   | 10       | 28.5   | 10      | 54.0   |
|          | 150 | 10   | 7         | 1447.1 | 10     | 777.8  | 10       | 577.4  | 9           | 679.2  | 8        | 1538.9 | 10      | 1118.0 |
|          | 200 | 10   | 6         | 2896.3 | 9      | 1399.0 | 8        | 1908.6 | 5           | 2548.2 | 6        | 2394.1 | 3       | 3150.8 |
|          | 250 | 10   | 1         | 3391.7 | 1      | 3290.1 | 0        | 3600.0 | 0           | 3600.0 | 0        | 3600.0 | 0       | 3600.0 |
| Subtotal |     | 40   | 24        | 1953.2 | 30     | 1375.2 | 28       | 1531.0 | 24          | 1713.0 | 24       | 1890.4 | 23      | 1980.7 |
| 36       | 100 | 10   | 7         | 2235.3 | 6      | 2793.7 | 8        | 1737.4 | 9           | 1809.8 | 5        | 2249.7 | 7       | 2174.5 |
|          | 150 | 10   | 2         | 3006.6 | 1      | 3336.6 | 0        | 3600.0 | 1           | 3380.1 | 1        | 3415.4 | 0       | 3600.0 |
|          | 200 | 10   | 0         | 3600.0 | 0      | 3600.0 | 0        | 3600.0 | 0           | 3600.0 | 0        | 3600.0 | 0       | 3600.0 |
|          | 250 | 10   | 0         | 3600.0 | 0      | 3600.0 | 0        | 3600.0 | 0           | 3600.0 | 0        | 3600.0 | 0       | 3600.0 |
| Subtotal |     | 40   | 9         | 3110.5 | 7      | 3332.6 | 8        | 3134.4 | 10          | 3097.5 | 6        | 3216.3 | 7       | 3243.6 |
| 48       | 100 | 10   | 2         | 3320.0 | 3      | 3251.1 | 1        | 3538.3 | 0           | 3600.0 | 1        | 3577.4 | 0       | 3600.0 |
|          | 150 | 10   | 0         | 3600.0 | 0      | 3600.0 | 0        | 3600.0 | 0           | 3600.0 | 0        | 3600.0 | 0       | 3600.0 |
|          | 200 | 10   | 0         | 3600.0 | 0      | 3600.0 | 0        | 3600.0 | 0           | 3600.0 | 0        | 3600.0 | 0       | 3600.0 |
|          | 250 | 10   | 0         | 3600.0 | 0      | 3600.0 | 0        | 3600.0 | 0           | 3600.0 | 0        | 3600.0 | 0       | 3600.0 |
| Subtotal |     | 40   | 2         | 3530.0 | 3      | 3512.8 | 1        | 3584.6 | 0           | 3600.0 | 1        | 3594.3 | 0       | 3600.0 |
| 60       | 100 | 10   | 1         | 3542.6 | 0      | 3600.0 | 0        | 3600.0 | 0           | 3600.0 | 1        | 3423.7 | 0       | 3600.0 |
|          | 150 | 10   | 0         | 3600.0 | 0      | 3600.0 | 0        | 3600.0 | 0           | 3600.0 | 0        | 3600.0 | 0       | 3600.0 |
|          | 200 | 10   | 0         | 3600.0 | 0      | 3600.0 | 0        | 3600.0 | 0           | 3600.0 | 0        | 3600.0 | 0       | 3600.0 |
|          | 250 | 10   | 0         | 3600.0 | 0      | 3600.0 | 0        | 3600.0 | 0           | 3600.0 | 0        | 3600.0 | 0       | 3600.0 |
| Subtotal |     | 40   | 1         | 3585.6 | 0      | 3600.0 | 0        | 3600.0 | 0           | 3600.0 | 1        | 3555.9 | 0       | 3600.0 |
| 72       | 100 | 10   | 0         | 3600.0 | 0      | 3600.0 | 0        | 3600.0 | 0           | 3600.0 | 0        | 3600.0 | 0       | 3600.0 |
|          | 150 | 10   | 0         | 3600.0 | 0      | 3600.0 | 0        | 3600.0 | 0           | 3600.0 | 0        | 3600.0 | 0       | 3600.0 |
|          | 200 | 10   | 0         | 3600.0 | 0      | 3600.0 | 0        | 3600.0 | 0           | 3600.0 | 0        | 3600.0 | 0       | 3600.0 |
|          | 250 | 10   | 0         | 3600.0 | 0      | 3600.0 | 0        | 3600.0 | 0           | 3600.0 | 0        | 3600.0 | 0       | 3600.0 |
| Subtotal |     | 40   | 0         | 3600.0 | 0      | 3600.0 | 0        | 3600.0 | 0           | 3600.0 | 0        | 3600.0 | 0       | 3600.0 |
| Total    |     | 200  | 36        | 3155.9 | 40     | 3084.1 | 37       | 3090.0 | 34          | 3122.1 | 32       | 3171.4 | 30      | 3204.9 |

## F.2. Detailed Results of BPC Algorithm

Tables EC.7–EC.42 provide detailed results for the six benchmark sets and all routing strategies aggregated by capacity  $Q$  and number of orders  $n$ . They report the number of instances solved to optimality within the time limit of one hour ( $Opt$ ), the average solution time in seconds ( $t[s]$ ), the average time for solving the LP-relaxation in seconds ( $t^{LP}$ ), the average optimality gap with respect to the best known solution of the LP-relaxation ( $Gp$ ), the average optimality gap with respect to the best known solution before the first node resulting from a Ryan-and-Foster branching is solved ( $Gp^{RF}$ ), the average number of B&B nodes solved ( $Nds$ ), and the average number of CCs ( $CC$ ) and SRCs ( $SRC$ ) added. In cases where no average could be computed for a given group, e.g., because the LP-relaxation could not be solved for one of the comprised instances, the respective cell is left blank.

**Table EC.7 Detailed results of our BPC algorithm for the M&O instances and the traversal strategy**

| $Q$   | $n$      | Inst | Opt | $t[s]$ | $t^{LP}$ | $Gp$ | $Gp^{RF}$ | Nds   | CC | SRC |
|-------|----------|------|-----|--------|----------|------|-----------|-------|----|-----|
| 24    | 20       | 10   | 10  | 0.2    | 0.0      | 1.68 | 0.25      | 5     | 13 | 12  |
|       | 30       | 10   | 10  | 0.7    | 0.0      | 1.81 | 0.31      | 12    | 21 | 30  |
|       | 40       | 10   | 10  | 8.6    | 0.0      | 1.01 | 0.28      | 258   | 18 | 37  |
|       | 50       | 10   | 10  | 14.8   | 0.1      | 1.11 | 0.44      | 107   | 33 | 41  |
|       | 60       | 10   | 10  | 11.5   | 0.1      | 0.82 | 0.32      | 95    | 10 | 43  |
|       | 70       | 10   | 10  | 37.9   | 0.2      | 0.77 | 0.30      | 212   | 32 | 53  |
|       | 80       | 10   | 10  | 392.4  | 0.2      | 0.62 | 0.31      | 5047  | 17 | 53  |
|       | 90       | 10   | 8   | 1097.6 | 0.3      | 0.56 | 0.35      | 13403 | 22 | 48  |
|       | 100      | 10   | 10  | 493.0  | 0.4      | 0.44 | 0.22      | 1977  | 27 | 59  |
|       | Subtotal | 90   | 88  | 228.5  | 0.2      | 0.98 | 0.31      | 2346  | 21 | 42  |
| 36    | 20       | 10   | 10  | 2.1    | 0.0      | 4.57 | 0.26      | 6     | 29 | 48  |
|       | 30       | 10   | 10  | 25.4   | 0.1      | 2.13 | 0.60      | 47    | 41 | 70  |
|       | 40       | 10   | 10  | 43.5   | 0.3      | 2.17 | 0.49      | 54    | 44 | 86  |
|       | 50       | 10   | 9   | 649.2  | 0.6      | 2.18 | 0.73      | 1129  | 58 | 98  |
|       | 60       | 10   | 10  | 805.8  | 0.9      | 2.16 | 0.65      | 2457  | 35 | 88  |
|       | 70       | 10   | 8   | 1125.5 | 1.3      | 1.54 | 0.54      | 2714  | 41 | 101 |
|       | 80       | 10   | 5   | 2141.7 | 2.0      | 1.66 | 0.54      | 4834  | 50 | 104 |
|       | 90       | 10   | 6   | 2295.7 | 2.5      | 1.46 | 0.53      | 5530  | 42 | 116 |
|       | 100      | 10   | 4   | 2394.8 | 3.1      | 1.20 | 0.56      | 6922  | 29 | 110 |
|       | Subtotal | 90   | 72  | 1053.7 | 1.2      | 2.12 | 0.54      | 2633  | 41 | 91  |
| 48    | 20       | 10   | 10  | 3.6    | 0.1      | 6.29 | 0.14      | 5     | 33 | 60  |
|       | 30       | 10   | 10  | 146.5  | 0.4      | 5.00 | 0.50      | 50    | 81 | 101 |
|       | 40       | 10   | 9   | 612.7  | 0.9      | 2.65 | 0.60      | 1297  | 37 | 118 |
|       | 50       | 10   | 6   | 2285.0 | 2.3      | 3.06 | 0.84      | 2539  | 72 | 112 |
|       | 60       | 10   | 6   | 1677.9 | 3.7      | 1.64 | 0.70      | 1885  | 22 | 122 |
|       | 70       | 10   | 3   | 2951.5 | 5.2      | 2.28 | 0.89      | 2344  | 62 | 126 |
|       | 80       | 10   | 1   | 3316.5 | 7.7      | 2.02 | 0.90      | 4711  | 41 | 123 |
|       | 90       | 10   | 1   | 3276.8 | 13.4     | 2.33 | 0.82      | 1333  | 85 | 127 |
|       | 100      | 10   | 2   | 3039.8 | 14.0     | 1.56 | 0.74      | 1590  | 63 | 128 |
|       | Subtotal | 90   | 48  | 1923.4 | 5.3      | 2.98 | 0.68      | 1750  | 55 | 113 |
| Total |          | 270  | 208 | 1068.5 | 2.2      | 2.03 | 0.51      | 2243  | 39 | 82  |

**Table EC.8** Detailed results of our BPC algorithm for the M&O instances and the return strategy

| $Q$   | $n$      | Inst | Opt | $t[s]$ | $t^{LP}$ | Gp   | $Gp^{RF}$ | Nds  | CC   | SRC |
|-------|----------|------|-----|--------|----------|------|-----------|------|------|-----|
| 24    | 20       | 10   | 10  | 0.1    | 0.0      | 1.38 | 0.10      | 3    | 6    | 11  |
|       | 30       | 10   | 10  | 1.1    | 0.0      | 1.67 | 0.30      | 18   | 25   | 30  |
|       | 40       | 10   | 10  | 1.9    | 0.0      | 0.87 | 0.24      | 24   | 16   | 36  |
|       | 50       | 10   | 10  | 13.0   | 0.1      | 0.83 | 0.24      | 62   | 32   | 41  |
|       | 60       | 10   | 10  | 3.0    | 0.1      | 0.59 | 0.16      | 18   | 9    | 41  |
|       | 70       | 10   | 10  | 73.8   | 0.2      | 0.68 | 0.27      | 305  | 34   | 44  |
|       | 80       | 10   | 10  | 128.3  | 0.3      | 0.54 | 0.28      | 932  | 14   | 47  |
|       | 90       | 10   | 10  | 570.1  | 0.3      | 0.52 | 0.29      | 7851 | 10   | 44  |
|       | 100      | 10   | 10  | 274.8  | 0.4      | 0.46 | 0.25      | 1209 | 27   | 45  |
|       | Subtotal |      | 90  | 90     | 118.5    | 0.2  | 0.84      | 0.24 | 1158 | 19  |
| 36    | 20       | 10   | 10  | 0.6    | 0.0      | 3.61 | 0.11      | 4    | 28   | 38  |
|       | 30       | 10   | 10  | 5.6    | 0.1      | 1.69 | 0.20      | 9    | 41   | 48  |
|       | 40       | 10   | 10  | 30.8   | 0.3      | 2.14 | 0.33      | 31   | 45   | 62  |
|       | 50       | 10   | 10  | 59.3   | 0.5      | 1.61 | 0.36      | 41   | 67   | 76  |
|       | 60       | 10   | 10  | 137.9  | 0.9      | 1.85 | 0.42      | 166  | 42   | 80  |
|       | 70       | 10   | 10  | 791.9  | 1.3      | 1.30 | 0.44      | 450  | 65   | 80  |
|       | 80       | 10   | 8   | 1829.8 | 2.0      | 1.53 | 0.50      | 3322 | 67   | 86  |
|       | 90       | 10   | 10  | 1098.1 | 2.6      | 1.22 | 0.40      | 2111 | 46   | 76  |
|       | 100      | 10   | 5   | 2971.8 | 3.3      | 1.21 | 0.55      | 5732 | 53   | 90  |
|       | Subtotal |      | 90  | 83     | 769.5    | 1.2  | 1.79      | 0.37 | 1318 | 51  |
| 48    | 20       | 10   | 10  | 1.2    | 0.1      | 5.04 | 0.00      | 2    | 37   | 25  |
|       | 30       | 10   | 10  | 21.8   | 0.5      | 4.04 | 0.17      | 6    | 69   | 70  |
|       | 40       | 10   | 10  | 32.0   | 1.2      | 2.26 | 0.31      | 14   | 49   | 86  |
|       | 50       | 10   | 10  | 613.0  | 2.8      | 2.70 | 0.51      | 72   | 111  | 106 |
|       | 60       | 10   | 10  | 363.6  | 4.3      | 1.47 | 0.39      | 60   | 60   | 103 |
|       | 70       | 10   | 5   | 2208.9 | 6.7      | 2.02 | 0.65      | 354  | 101  | 105 |
|       | 80       | 10   | 5   | 2381.6 | 11.4     | 1.93 | 0.87      | 1478 | 79   | 109 |
|       | 90       | 10   | 1   | 3387.3 | 13.0     | 2.43 | 1.00      | 1090 | 112  | 122 |
|       | 100      | 10   | 3   | 3140.0 | 16.7     | 1.75 | 0.92      | 1000 | 88   | 118 |
|       | Subtotal |      | 90  | 64     | 1349.9   | 6.3  | 2.63      | 0.54 | 453  | 78  |
| Total |          | 270  | 237 | 746.0  | 2.6      | 1.75 | 0.38      | 976  | 49   | 67  |

**Table EC.9 Detailed results of our BPC algorithm for the M&O instances and the midpoint strategy**

| $Q$      | $n$ | Inst | Opt    | $t[s]$ | $t^{LP}$ | Gp   | $Gp^{RF}$ | Nds  | CC  | SRC |
|----------|-----|------|--------|--------|----------|------|-----------|------|-----|-----|
| 24       | 20  | 10   | 10     | 0.0    | 0.0      | 0.81 | 0.04      | 2    | 4   | 3   |
|          | 30  | 10   | 10     | 0.4    | 0.0      | 1.08 | 0.13      | 6    | 12  | 21  |
|          | 40  | 10   | 10     | 1.6    | 0.0      | 0.70 | 0.22      | 23   | 9   | 28  |
|          | 50  | 10   | 10     | 3.0    | 0.1      | 0.63 | 0.21      | 17   | 12  | 33  |
|          | 60  | 10   | 10     | 5.2    | 0.1      | 0.70 | 0.23      | 31   | 8   | 42  |
|          | 70  | 10   | 10     | 17.3   | 0.2      | 0.64 | 0.25      | 82   | 14  | 38  |
|          | 80  | 10   | 10     | 39.2   | 0.3      | 0.49 | 0.25      | 276  | 6   | 43  |
|          | 90  | 10   | 10     | 269.3  | 0.4      | 0.49 | 0.28      | 2429 | 16  | 42  |
| 100      | 10  | 9    | 582.6  | 0.4    | 0.47     | 0.31 | 5873      | 8    | 42  |     |
| Subtotal |     | 90   | 89     | 102.1  | 0.2      | 0.67 | 0.21      | 971  | 10  | 32  |
| 36       | 20  | 10   | 10     | 0.3    | 0.0      | 2.58 | 0.10      | 3    | 15  | 26  |
|          | 30  | 10   | 10     | 2.5    | 0.2      | 1.09 | 0.13      | 4    | 21  | 41  |
|          | 40  | 10   | 10     | 7.2    | 0.3      | 1.62 | 0.26      | 16   | 25  | 56  |
|          | 50  | 10   | 10     | 27.1   | 0.8      | 1.36 | 0.31      | 30   | 34  | 68  |
|          | 60  | 10   | 10     | 85.1   | 1.2      | 1.50 | 0.43      | 140  | 22  | 68  |
|          | 70  | 10   | 10     | 160.4  | 1.9      | 1.09 | 0.46      | 254  | 26  | 73  |
|          | 80  | 10   | 10     | 989.0  | 2.8      | 1.42 | 0.52      | 2111 | 37  | 80  |
|          | 90  | 10   | 10     | 1402.3 | 3.7      | 1.19 | 0.48      | 3509 | 25  | 86  |
| 100      | 10  | 8    | 2107.6 | 4.0    | 0.94     | 0.50 | 6743      | 16   | 77  |     |
| Subtotal |     | 90   | 88     | 531.3  | 1.7      | 1.42 | 0.35      | 1423 | 24  | 64  |
| 48       | 20  | 10   | 10     | 0.5    | 0.1      | 4.19 | 0.01      | 2    | 32  | 30  |
|          | 30  | 10   | 10     | 46.4   | 0.7      | 3.41 | 0.33      | 13   | 73  | 84  |
|          | 40  | 10   | 10     | 57.3   | 1.7      | 1.89 | 0.36      | 25   | 44  | 80  |
|          | 50  | 10   | 10     | 187.0  | 4.6      | 2.44 | 0.51      | 73   | 71  | 100 |
|          | 60  | 10   | 10     | 268.6  | 6.9      | 1.46 | 0.62      | 272  | 21  | 100 |
|          | 70  | 10   | 6      | 2286.7 | 12.8     | 2.00 | 0.91      | 1819 | 67  | 104 |
|          | 80  | 10   | 7      | 2197.2 | 18.9     | 1.64 | 0.78      | 1602 | 38  | 109 |
|          | 90  | 10   | 3      | 3160.0 | 25.6     | 2.13 | 1.01      | 1385 | 65  | 112 |
| 100      | 10  | 1    | 3387.8 | 31.9   | 2.11     | 1.53 | 2451      | 47   | 106 |     |
| Subtotal |     | 90   | 67     | 1287.9 | 11.5     | 2.36 | 0.67      | 849  | 51  | 92  |
| Total    |     | 270  | 244    | 640.4  | 4.4      | 1.48 | 0.41      | 1081 | 28  | 63  |

**Table EC.10** Detailed results of our BPC algorithm for the M&Ö instances and the largest gap strategy

| $Q$      | $n$ | Inst | Opt | t[s]   | $t^{LP}$ | Gp   | $Gp^{RF}$ | Nds  | CC | SRC |
|----------|-----|------|-----|--------|----------|------|-----------|------|----|-----|
| 24       | 20  | 10   | 10  | 0.1    | 0.0      | 1.16 | 0.02      | 2    | 7  | 9   |
|          | 30  | 10   | 10  | 0.9    | 0.0      | 1.22 | 0.19      | 12   | 14 | 27  |
|          | 40  | 10   | 10  | 2.3    | 0.1      | 0.77 | 0.19      | 34   | 12 | 28  |
|          | 50  | 10   | 10  | 8.1    | 0.1      | 0.74 | 0.29      | 51   | 13 | 38  |
|          | 60  | 10   | 10  | 12.5   | 0.2      | 0.67 | 0.25      | 94   | 6  | 41  |
|          | 70  | 10   | 10  | 53.3   | 0.2      | 0.63 | 0.26      | 261  | 16 | 42  |
|          | 80  | 10   | 10  | 69.5   | 0.3      | 0.49 | 0.27      | 487  | 6  | 46  |
|          | 90  | 10   | 9   | 457.4  | 0.4      | 0.49 | 0.28      | 5550 | 12 | 43  |
|          | 100 | 10   | 10  | 186.5  | 0.5      | 0.41 | 0.26      | 1114 | 8  | 43  |
| Subtotal |     | 90   | 89  | 87.8   | 0.2      | 0.73 | 0.22      | 845  | 10 | 35  |
| 36       | 20  | 10   | 10  | 0.2    | 0.1      | 2.46 | 0.00      | 1    | 12 | 14  |
|          | 30  | 10   | 10  | 3.2    | 0.2      | 1.22 | 0.20      | 6    | 23 | 41  |
|          | 40  | 10   | 10  | 14.7   | 0.4      | 1.72 | 0.23      | 22   | 30 | 59  |
|          | 50  | 10   | 10  | 116.2  | 1.2      | 1.48 | 0.42      | 166  | 40 | 70  |
|          | 60  | 10   | 10  | 71.5   | 1.5      | 1.49 | 0.38      | 167  | 24 | 69  |
|          | 70  | 10   | 10  | 373.2  | 2.5      | 1.16 | 0.51      | 444  | 27 | 73  |
|          | 80  | 10   | 10  | 929.4  | 3.8      | 1.45 | 0.50      | 1712 | 40 | 78  |
|          | 90  | 10   | 7   | 1941.4 | 4.4      | 1.21 | 0.51      | 6519 | 22 | 73  |
|          | 100 | 10   | 3   | 2977.9 | 5.8      | 1.23 | 0.76      | 6745 | 18 | 78  |
| Subtotal |     | 90   | 80  | 714.2  | 2.2      | 1.49 | 0.39      | 1754 | 26 | 62  |
| 48       | 20  | 10   | 10  | 1.0    | 0.2      | 4.16 | 0.04      | 2    | 24 | 26  |
|          | 30  | 10   | 10  | 35.6   | 1.1      | 3.59 | 0.24      | 10   | 65 | 84  |
|          | 40  | 10   | 10  | 47.8   | 2.5      | 1.97 | 0.32      | 23   | 38 | 80  |
|          | 50  | 10   | 10  | 402.9  | 7.2      | 2.52 | 0.60      | 187  | 60 | 99  |
|          | 60  | 10   | 10  | 589.4  | 12.4     | 1.48 | 0.69      | 448  | 26 | 99  |
|          | 70  | 10   | 5   | 2254.9 | 18.9     | 1.99 | 0.88      | 1162 | 62 | 100 |
|          | 80  | 10   | 5   | 3031.7 | 31.2     | 1.60 | 0.79      | 2119 | 32 | 101 |
|          | 90  | 10   | 3   | 2828.2 | 37.2     | 2.44 | 1.28      | 1580 | 67 | 103 |
|          | 100 | 10   | 3   | 3004.0 | 50.5     | 1.80 | 1.26      | 1290 | 44 | 105 |
| Subtotal |     | 90   | 66  | 1355.1 | 17.9     | 2.40 | 0.68      | 758  | 46 | 89  |
| Total    |     | 270  | 235 | 719.0  | 6.8      | 1.54 | 0.43      | 1119 | 28 | 62  |

**Table EC.11** Detailed results of our BPC algorithm for the M&O instances and the combined strategy

| $Q$      | $n$ | Inst | Opt | t[s]   | $t^{LP}$ | Gp   | $Gp^{RF}$ | Nds  | CC | SRC |
|----------|-----|------|-----|--------|----------|------|-----------|------|----|-----|
| 24       | 20  | 10   | 10  | 0.1    | 0.0      | 1.53 | 0.19      | 5    | 8  | 14  |
|          | 30  | 10   | 10  | 0.4    | 0.0      | 1.50 | 0.11      | 6    | 16 | 18  |
|          | 40  | 10   | 10  | 3.7    | 0.0      | 0.93 | 0.32      | 38   | 18 | 34  |
|          | 50  | 10   | 10  | 9.2    | 0.1      | 0.92 | 0.33      | 54   | 25 | 34  |
|          | 60  | 10   | 10  | 8.3    | 0.1      | 0.65 | 0.29      | 63   | 5  | 38  |
|          | 70  | 10   | 10  | 118.5  | 0.2      | 0.73 | 0.33      | 1320 | 22 | 40  |
|          | 80  | 10   | 10  | 51.0   | 0.3      | 0.56 | 0.28      | 229  | 12 | 47  |
|          | 90  | 10   | 10  | 406.2  | 0.4      | 0.46 | 0.27      | 3806 | 11 | 47  |
|          | 100 | 10   | 10  | 376.6  | 0.4      | 0.43 | 0.24      | 1208 | 24 | 53  |
| Subtotal |     | 90   | 90  | 108.2  | 0.2      | 0.86 | 0.26      | 748  | 16 | 36  |
| 36       | 20  | 10   | 10  | 0.4    | 0.0      | 3.50 | 0.06      | 3    | 24 | 28  |
|          | 30  | 10   | 10  | 2.8    | 0.1      | 1.53 | 0.24      | 8    | 29 | 50  |
|          | 40  | 10   | 10  | 26.1   | 0.3      | 2.13 | 0.43      | 40   | 46 | 62  |
|          | 50  | 10   | 10  | 163.2  | 0.6      | 1.93 | 0.51      | 121  | 65 | 78  |
|          | 60  | 10   | 10  | 272.1  | 0.9      | 1.95 | 0.52      | 510  | 49 | 82  |
|          | 70  | 10   | 10  | 737.4  | 1.4      | 1.39 | 0.53      | 1499 | 46 | 85  |
|          | 80  | 10   | 8   | 1977.1 | 2.3      | 1.66 | 0.61      | 4992 | 47 | 87  |
|          | 90  | 10   | 9   | 1425.8 | 2.6      | 1.25 | 0.45      | 2761 | 38 | 88  |
|          | 100 | 10   | 4   | 3150.5 | 3.3      | 1.34 | 0.69      | 8890 | 39 | 95  |
| Subtotal |     | 90   | 81  | 861.7  | 1.3      | 1.86 | 0.45      | 2092 | 43 | 73  |
| 48       | 20  | 10   | 10  | 1.4    | 0.1      | 5.48 | 0.09      | 3    | 34 | 45  |
|          | 30  | 10   | 10  | 49.1   | 0.5      | 4.66 | 0.40      | 19   | 72 | 100 |
|          | 40  | 10   | 10  | 41.3   | 1.1      | 2.29 | 0.38      | 32   | 48 | 95  |
|          | 50  | 10   | 9   | 1202.6 | 2.9      | 3.14 | 0.72      | 315  | 98 | 109 |
|          | 60  | 10   | 10  | 539.0  | 4.1      | 1.59 | 0.57      | 311  | 48 | 112 |
|          | 70  | 10   | 7   | 1746.4 | 6.7      | 2.03 | 0.64      | 518  | 82 | 115 |
|          | 80  | 10   | 7   | 2345.8 | 9.1      | 1.78 | 0.68      | 3816 | 48 | 118 |
|          | 90  | 10   | 0   | 3600.0 | 12.0     | 2.62 | 1.17      | 2247 | 91 | 120 |
|          | 100 | 10   | 0   | 3600.0 | 15.2     | 1.96 | 1.21      | 2587 | 55 | 125 |
| Subtotal |     | 90   | 63  | 1458.4 | 5.8      | 2.84 | 0.65      | 1094 | 64 | 104 |
| Total    |     | 270  | 234 | 809.4  | 2.4      | 1.85 | 0.45      | 1311 | 41 | 71  |

**Table EC.12 Detailed results of our BPC algorithm for the M&Ö instances and the optimal strategy**

| $Q$      | $n$ | Inst | Opt | t[s]   | $t^{LP}$ | Gp   | $Gp^{RF}$ | Nds  | CC | SRC |
|----------|-----|------|-----|--------|----------|------|-----------|------|----|-----|
| 24       | 20  | 10   | 10  | 0.1    | 0.0      | 1.36 | 0.15      | 3    | 8  | 14  |
|          | 30  | 10   | 10  | 0.7    | 0.0      | 1.53 | 0.20      | 9    | 15 | 25  |
|          | 40  | 10   | 10  | 2.2    | 0.1      | 0.89 | 0.27      | 22   | 14 | 37  |
|          | 50  | 10   | 10  | 6.3    | 0.2      | 0.75 | 0.23      | 38   | 18 | 36  |
|          | 60  | 10   | 10  | 7.1    | 0.2      | 0.59 | 0.24      | 42   | 7  | 36  |
|          | 70  | 10   | 10  | 59.3   | 0.3      | 0.69 | 0.26      | 342  | 20 | 44  |
|          | 80  | 10   | 10  | 40.5   | 0.5      | 0.51 | 0.23      | 163  | 10 | 45  |
|          | 90  | 10   | 9   | 557.6  | 0.6      | 0.49 | 0.29      | 6205 | 7  | 46  |
|          | 100 | 10   | 9   | 508.3  | 0.7      | 0.41 | 0.23      | 2803 | 13 | 41  |
| Subtotal |     | 90   | 88  | 131.3  | 0.3      | 0.80 | 0.23      | 1070 | 12 | 36  |
| 36       | 20  | 10   | 10  | 0.4    | 0.1      | 3.30 | 0.05      | 2    | 24 | 22  |
|          | 30  | 10   | 10  | 6.5    | 0.3      | 1.48 | 0.20      | 8    | 38 | 50  |
|          | 40  | 10   | 10  | 29.7   | 0.7      | 2.04 | 0.37      | 30   | 47 | 64  |
|          | 50  | 10   | 10  | 59.9   | 1.4      | 1.61 | 0.42      | 74   | 38 | 69  |
|          | 60  | 10   | 10  | 156.3  | 1.9      | 1.76 | 0.44      | 199  | 38 | 76  |
|          | 70  | 10   | 10  | 359.3  | 2.9      | 1.35 | 0.47      | 443  | 43 | 82  |
|          | 80  | 10   | 8   | 1755.7 | 4.8      | 1.56 | 0.51      | 4018 | 46 | 76  |
|          | 90  | 10   | 7   | 1969.3 | 5.3      | 1.31 | 0.49      | 4764 | 34 | 84  |
|          | 100 | 10   | 4   | 2881.0 | 6.8      | 1.26 | 0.65      | 5905 | 30 | 94  |
| Subtotal |     | 90   | 79  | 802.0  | 2.7      | 1.74 | 0.40      | 1716 | 38 | 69  |
| 48       | 20  | 10   | 10  | 0.9    | 0.2      | 4.89 | 0.01      | 2    | 34 | 22  |
|          | 30  | 10   | 10  | 96.5   | 1.4      | 4.31 | 0.31      | 11   | 83 | 87  |
|          | 40  | 10   | 10  | 134.2  | 3.4      | 2.45 | 0.45      | 38   | 55 | 95  |
|          | 50  | 10   | 9   | 1030.0 | 7.2      | 3.07 | 0.73      | 228  | 96 | 110 |
|          | 60  | 10   | 10  | 560.2  | 10.3     | 1.50 | 0.55      | 283  | 43 | 100 |
|          | 70  | 10   | 7   | 1887.1 | 17.7     | 2.16 | 0.79      | 466  | 83 | 114 |
|          | 80  | 10   | 7   | 2471.7 | 27.7     | 1.67 | 0.58      | 1498 | 54 | 123 |
|          | 90  | 10   | 1   | 3574.5 | 38.3     | 2.51 | 1.18      | 1091 | 84 | 118 |
|          | 100 | 10   | 1   | 3305.2 | 43.5     | 2.07 | 1.35      | 1401 | 67 | 121 |
| Subtotal |     | 90   | 65  | 1451.2 | 16.6     | 2.74 | 0.66      | 558  | 67 | 99  |
| Total    |     | 270  | 232 | 794.8  | 6.5      | 1.76 | 0.43      | 1114 | 39 | 68  |

**Table EC.13** Detailed results of our BPC algorithm for the H&W instances and the traversal strategy

| $Q$      | $n$  | Inst | Opt    | $t[s]$ | $t^{LP}$ | Gp   | $Gp^{RF}$ | Nds   | CC  | SRC |
|----------|------|------|--------|--------|----------|------|-----------|-------|-----|-----|
| 30       | 20   | 160  | 160    | 0.0    | 0.0      | 0.71 | 0.04      | 3     | 1   | 0   |
|          | 30   | 160  | 160    | 0.0    | 0.0      | 0.42 | 0.04      | 5     | 2   | 1   |
|          | 40   | 160  | 160    | 0.1    | 0.0      | 0.30 | 0.04      | 14    | 6   | 1   |
|          | 50   | 160  | 160    | 0.1    | 0.0      | 0.28 | 0.02      | 7     | 4   | 1   |
|          | 60   | 160  | 158    | 45.2   | 0.0      | 0.27 | 0.03      | 966   | 8   | 1   |
|          | 70   | 160  | 158    | 45.2   | 0.0      | 0.21 | 0.03      | 387   | 10  | 2   |
|          | 80   | 160  | 155    | 129.2  | 0.0      | 0.20 | 0.03      | 1295  | 12  | 2   |
|          | 90   | 160  | 154    | 157.5  | 0.0      | 0.16 | 0.02      | 1230  | 10  | 1   |
| 100      | 160  | 155  | 123.1  | 0.0    | 0.17     | 0.02 | 888       | 16    | 2   |     |
| Subtotal | 1440 | 1420 |        | 55.6   | 0.0      | 0.30 | 0.03      | 533   | 8   | 1   |
| 45       | 20   | 160  | 160    | 0.2    | 0.0      | 1.15 | 0.28      | 13    | 8   | 10  |
|          | 30   | 160  | 160    | 11.0   | 0.0      | 0.73 | 0.29      | 933   | 9   | 15  |
|          | 40   | 160  | 160    | 34.1   | 0.0      | 0.61 | 0.24      | 1845  | 14  | 19  |
|          | 50   | 160  | 157    | 113.5  | 0.0      | 0.58 | 0.26      | 5001  | 22  | 26  |
|          | 60   | 160  | 152    | 221.5  | 0.1      | 0.47 | 0.23      | 7458  | 21  | 29  |
|          | 70   | 160  | 150    | 334.3  | 0.1      | 0.43 | 0.21      | 10293 | 25  | 31  |
|          | 80   | 160  | 145    | 491.4  | 0.2      | 0.41 | 0.20      | 10162 | 27  | 36  |
|          | 90   | 160  | 136    | 745.1  | 0.2      | 0.38 | 0.19      | 13483 | 33  | 38  |
| 100      | 160  | 132  | 818.8  | 0.3    | 0.36     | 0.19 | 14740     | 30    | 41  |     |
| Subtotal | 1440 | 1352 |        | 307.8  | 0.1      | 0.57 | 0.23      | 7103  | 21  | 27  |
| 60       | 20   | 160  | 160    | 1.3    | 0.0      | 2.03 | 0.35      | 71    | 15  | 25  |
|          | 30   | 160  | 159    | 49.5   | 0.0      | 1.33 | 0.36      | 2911  | 12  | 31  |
|          | 40   | 160  | 149    | 325.4  | 0.1      | 1.05 | 0.39      | 11555 | 16  | 43  |
|          | 50   | 160  | 138    | 657.8  | 0.2      | 0.88 | 0.36      | 21302 | 15  | 50  |
|          | 60   | 160  | 130    | 932.1  | 0.3      | 0.80 | 0.34      | 21348 | 21  | 55  |
|          | 70   | 160  | 102    | 1503.0 | 0.4      | 0.73 | 0.34      | 29825 | 24  | 60  |
|          | 80   | 160  | 79     | 2031.4 | 0.6      | 0.66 | 0.32      | 33341 | 26  | 68  |
|          | 90   | 160  | 64     | 2432.1 | 0.9      | 0.61 | 0.31      | 33915 | 25  | 75  |
| 100      | 160  | 39   | 2898.1 | 1.2    | 0.59     | 0.29 | 30792     | 32    | 81  |     |
| Subtotal | 1440 | 1020 |        | 1203.4 | 0.4      | 0.96 | 0.34      | 20562 | 21  | 54  |
| 75       | 20   | 160  | 160    | 36.8   | 0.0      | 2.30 | 0.29      | 1512  | 18  | 45  |
|          | 30   | 160  | 140    | 598.3  | 0.1      | 1.79 | 0.39      | 16026 | 17  | 53  |
|          | 40   | 160  | 130    | 881.6  | 0.2      | 1.55 | 0.38      | 19846 | 21  | 67  |
|          | 50   | 160  | 93     | 1731.2 | 0.4      | 1.41 | 0.42      | 27441 | 27  | 72  |
|          | 60   | 160  | 83     | 2031.8 | 0.7      | 1.12 | 0.40      | 26043 | 26  | 83  |
|          | 70   | 160  | 50     | 2633.9 | 1.1      | 0.99 | 0.36      | 28428 | 30  | 93  |
|          | 80   | 160  | 36     | 2966.8 | 1.5      | 0.87 | 0.35      | 27565 | 35  | 96  |
|          | 90   | 160  | 15     | 3362.6 | 2.2      | 0.86 | 0.36      | 24390 | 39  | 105 |
| 100      | 160  | 13   | 3399.2 | 2.8    | 0.75     | 0.33 | 22555     | 39    | 108 |     |
| Subtotal | 1440 | 720  |        | 1960.2 | 1.0      | 1.29 | 0.36      | 21534 | 28  | 80  |
| Total    |      | 5760 | 4512   | 881.8  | 0.4      | 0.78 | 0.24      | 12433 | 19  | 41  |

**Table EC.14** Detailed results of our BPC algorithm for the H&W instances and the return strategy

| $Q$      | $n$  | Inst | Opt    | t[s]   | $t^{LP}$ | Gp   | $Gp^{RF}$ | Nds  | CC   | SRC |    |
|----------|------|------|--------|--------|----------|------|-----------|------|------|-----|----|
| 30       | 20   | 160  | 160    | 0.0    | 0.0      | 0.50 | 0.02      | 2    | 1    | 0   |    |
|          | 30   | 160  | 160    | 0.0    | 0.0      | 0.27 | 0.01      | 3    | 1    | 1   |    |
|          | 40   | 160  | 160    | 0.1    | 0.0      | 0.23 | 0.03      | 9    | 3    | 1   |    |
|          | 50   | 160  | 160    | 0.0    | 0.0      | 0.19 | 0.01      | 3    | 2    | 1   |    |
|          | 60   | 160  | 160    | 0.1    | 0.0      | 0.17 | 0.01      | 5    | 3    | 1   |    |
|          | 70   | 160  | 160    | 0.2    | 0.0      | 0.13 | 0.01      | 7    | 4    | 1   |    |
|          | 80   | 160  | 160    | 0.2    | 0.0      | 0.12 | 0.01      | 17   | 3    | 1   |    |
|          | 90   | 160  | 160    | 0.2    | 0.0      | 0.10 | 0.01      | 10   | 3    | 2   |    |
| 100      | 160  | 160  | 0.3    | 0.0    | 0.11     | 0.01 | 7         | 4    | 2    |     |    |
| Subtotal | 1440 | 1440 |        | 0.1    | 0.0      | 0.20 | 0.01      | 7    | 3    | 1   |    |
| 45       | 20   | 160  | 160    | 0.1    | 0.0      | 0.90 | 0.15      | 8    | 7    | 7   |    |
|          | 30   | 160  | 160    | 0.8    | 0.0      | 0.62 | 0.19      | 64   | 9    | 14  |    |
|          | 40   | 160  | 160    | 1.6    | 0.0      | 0.50 | 0.19      | 61   | 10   | 16  |    |
|          | 50   | 160  | 160    | 6.6    | 0.0      | 0.50 | 0.21      | 262  | 16   | 20  |    |
|          | 60   | 160  | 159    | 35.2   | 0.1      | 0.39 | 0.19      | 1294 | 12   | 24  |    |
|          | 70   | 160  | 158    | 80.2   | 0.1      | 0.37 | 0.18      | 2553 | 17   | 25  |    |
|          | 80   | 160  | 156    | 146.5  | 0.1      | 0.33 | 0.17      | 3636 | 15   | 27  |    |
|          | 90   | 160  | 158    | 178.9  | 0.2      | 0.30 | 0.16      | 3526 | 15   | 28  |    |
| 100      | 160  | 148  | 432.2  | 0.2    | 0.31     | 0.17 | 8045      | 12   | 32   |     |    |
| Subtotal | 1440 | 1419 |        | 98.0   | 0.1      | 0.47 | 0.18      | 2161 | 13   | 21  |    |
| 60       | 20   | 160  | 160    | 0.3    | 0.0      | 1.70 | 0.18      | 8    | 17   | 19  |    |
|          | 30   | 160  | 160    | 1.9    | 0.0      | 1.14 | 0.26      | 72   | 19   | 28  |    |
|          | 40   | 160  | 160    | 8.0    | 0.1      | 0.89 | 0.28      | 106  | 20   | 34  |    |
|          | 50   | 160  | 159    | 53.5   | 0.2      | 0.77 | 0.31      | 1209 | 21   | 40  |    |
|          | 60   | 160  | 159    | 132.8  | 0.3      | 0.70 | 0.31      | 2314 | 27   | 43  |    |
|          | 70   | 160  | 155    | 333.3  | 0.4      | 0.65 | 0.30      | 5415 | 26   | 45  |    |
|          | 80   | 160  | 146    | 626.3  | 0.6      | 0.61 | 0.31      | 7452 | 24   | 48  |    |
|          | 90   | 160  | 134    | 890.4  | 0.8      | 0.54 | 0.30      | 8265 | 23   | 53  |    |
| 100      | 160  | 123  | 1381.1 | 1.0    | 0.56     | 0.33 | 10414     | 27   | 54   |     |    |
| Subtotal | 1440 | 1356 |        | 380.8  | 0.4      | 0.84 | 0.29      | 3917 | 23   | 40  |    |
| 75       | 20   | 160  | 160    | 0.4    | 0.0      | 2.11 | 0.09      | 4    | 21   | 24  |    |
|          | 30   | 160  | 160    | 4.8    | 0.1      | 1.68 | 0.26      | 22   | 27   | 45  |    |
|          | 40   | 160  | 160    | 28.3   | 0.3      | 1.45 | 0.34      | 102  | 33   | 53  |    |
|          | 50   | 160  | 160    | 139.2  | 0.5      | 1.31 | 0.37      | 992  | 38   | 56  |    |
|          | 60   | 160  | 155    | 360.1  | 0.8      | 1.07 | 0.38      | 2263 | 39   | 59  |    |
|          | 70   | 160  | 152    | 721.9  | 1.3      | 0.95 | 0.38      | 3866 | 37   | 65  |    |
|          | 80   | 160  | 122    | 1473.2 | 1.9      | 0.94 | 0.43      | 5625 | 44   | 70  |    |
|          | 90   | 160  | 111    | 1901.0 | 2.7      | 0.91 | 0.46      | 6157 | 42   | 71  |    |
| 100      | 160  | 67   | 2758.6 | 3.3    | 0.99     | 0.59 | 9209      | 42   | 77   |     |    |
| Subtotal | 1440 | 1247 |        | 820.8  | 1.2      | 1.26 | 0.37      | 3138 | 36   | 58  |    |
| Total    |      | 5760 | 5462   |        | 325.0    | 0.4  | 0.69      |      | 2306 | 18  | 30 |

**Table EC.15 Detailed results of our BPC algorithm for the H&W instances and the midpoint strategy**

| $Q$      | $n$  | Inst | Opt  | $t[s]$ | $t^{LP}$ | Gp   | $Gp^{RF}$ | Nds  | CC   | SRC |    |
|----------|------|------|------|--------|----------|------|-----------|------|------|-----|----|
| 30       | 20   | 160  | 160  | 0.0    | 0.0      | 0.48 | 0.03      | 3    | 1    | 0   |    |
|          | 30   | 160  | 160  | 0.0    | 0.0      | 0.26 | 0.01      | 2    | 1    | 0   |    |
|          | 40   | 160  | 160  | 0.0    | 0.0      | 0.20 | 0.01      | 2    | 1    | 1   |    |
|          | 50   | 160  | 160  | 0.0    | 0.0      | 0.16 | 0.01      | 2    | 1    | 0   |    |
|          | 60   | 160  | 160  | 0.1    | 0.0      | 0.16 | 0.01      | 3    | 2    | 1   |    |
|          | 70   | 160  | 160  | 0.1    | 0.0      | 0.12 | 0.01      | 3    | 2    | 1   |    |
|          | 80   | 160  | 160  | 0.1    | 0.0      | 0.11 | 0.01      | 5    | 3    | 1   |    |
|          | 90   | 160  | 160  | 0.1    | 0.0      | 0.09 | 0.00      | 3    | 2    | 1   |    |
|          | 100  | 160  | 160  | 0.1    | 0.0      | 0.08 | 0.00      | 3    | 3    | 1   |    |
| Subtotal | 1440 | 1440 |      | 0.1    | 0.0      | 0.18 | 0.01      | 3    | 2    | 1   |    |
| 45       | 20   | 160  | 160  | 0.1    | 0.0      | 0.69 | 0.12      | 5    | 5    | 6   |    |
|          | 30   | 160  | 160  | 0.4    | 0.0      | 0.49 | 0.15      | 17   | 6    | 11  |    |
|          | 40   | 160  | 160  | 1.1    | 0.0      | 0.40 | 0.15      | 45   | 6    | 16  |    |
|          | 50   | 160  | 160  | 2.3    | 0.0      | 0.40 | 0.15      | 72   | 8    | 19  |    |
|          | 60   | 160  | 160  | 6.9    | 0.1      | 0.33 | 0.16      | 227  | 6    | 21  |    |
|          | 70   | 160  | 160  | 10.7   | 0.1      | 0.32 | 0.16      | 218  | 5    | 23  |    |
|          | 80   | 160  | 160  | 22.0   | 0.2      | 0.30 | 0.15      | 332  | 7    | 27  |    |
|          | 90   | 160  | 160  | 37.2   | 0.2      | 0.30 | 0.15      | 529  | 6    | 27  |    |
|          | 100  | 160  | 158  | 105.9  | 0.3      | 0.29 | 0.16      | 1683 | 5    | 30  |    |
| Subtotal | 1440 | 1438 |      | 20.7   | 0.1      | 0.39 | 0.15      | 347  | 6    | 20  |    |
| 60       | 20   | 160  | 160  | 0.2    | 0.0      | 1.08 | 0.11      | 4    | 13   | 15  |    |
|          | 30   | 160  | 160  | 1.9    | 0.0      | 0.88 | 0.25      | 43   | 12   | 26  |    |
|          | 40   | 160  | 160  | 5.0    | 0.1      | 0.72 | 0.30      | 57   | 13   | 31  |    |
|          | 50   | 160  | 160  | 25.0   | 0.2      | 0.63 | 0.30      | 586  | 12   | 36  |    |
|          | 60   | 160  | 158  | 127.6  | 0.3      | 0.63 | 0.34      | 2784 | 16   | 40  |    |
|          | 70   | 160  | 153  | 283.7  | 0.5      | 0.58 | 0.33      | 5145 | 13   | 40  |    |
|          | 80   | 160  | 147  | 501.5  | 0.6      | 0.54 | 0.32      | 6486 | 12   | 42  |    |
|          | 90   | 160  | 147  | 608.5  | 0.9      | 0.50 | 0.31      | 5916 | 14   | 46  |    |
|          | 100  | 160  | 139  | 932.1  | 1.2      | 0.49 | 0.32      | 7246 | 11   | 48  |    |
| Subtotal | 1440 | 1384 |      | 276.2  | 0.4      | 0.67 | 0.29      | 3141 | 13   | 36  |    |
| 75       | 20   | 160  | 160  | 0.3    | 0.0      | 1.48 | 0.08      | 3    | 18   | 21  |    |
|          | 30   | 160  | 160  | 3.7    | 0.1      | 1.32 | 0.24      | 23   | 20   | 39  |    |
|          | 40   | 160  | 160  | 18.8   | 0.3      | 1.17 | 0.34      | 128  | 26   | 47  |    |
|          | 50   | 160  | 160  | 100.4  | 0.6      | 1.09 | 0.43      | 684  | 30   | 50  |    |
|          | 60   | 160  | 157  | 304.6  | 0.9      | 0.94 | 0.44      | 2179 | 27   | 56  |    |
|          | 70   | 160  | 144  | 778.8  | 1.5      | 0.86 | 0.47      | 5038 | 24   | 57  |    |
|          | 80   | 160  | 134  | 1088.1 | 2.2      | 0.78 | 0.45      | 4933 | 29   | 59  |    |
|          | 90   | 160  | 109  | 1857.3 | 3.1      | 0.84 | 0.52      | 7098 | 28   | 62  |    |
|          | 100  | 160  | 78   | 2441.8 | 4.0      | 0.90 | 0.61      | 8481 | 27   | 66  |    |
| Subtotal | 1440 | 1262 |      | 732.6  | 1.4      | 1.04 | 0.40      | 3174 | 25   | 51  |    |
| Total    |      | 5760 | 5524 |        | 257.4    | 0.5  | 0.57      | 0.21 | 1666 | 11  | 27 |

**Table EC.16 Detailed results of our BPC algorithm for the H&W instances and the largest gap strategy**

| $Q$      | $n$ | Inst | Opt  | $t[s]$ | $t^{LP}$ | Gp   | $Gp^{RF}$ | Nds  | CC | SRC |
|----------|-----|------|------|--------|----------|------|-----------|------|----|-----|
| 30       | 20  | 160  | 160  | 0.0    | 0.0      | 0.49 | 0.01      | 2    | 1  | 0   |
|          | 30  | 160  | 160  | 0.0    | 0.0      | 0.26 | 0.00      | 2    | 1  | 0   |
|          | 40  | 160  | 160  | 0.0    | 0.0      | 0.22 | 0.01      | 2    | 1  | 1   |
|          | 50  | 160  | 160  | 0.0    | 0.0      | 0.19 | 0.01      | 3    | 2  | 0   |
|          | 60  | 160  | 160  | 0.1    | 0.0      | 0.18 | 0.01      | 4    | 2  | 1   |
|          | 70  | 160  | 160  | 0.1    | 0.0      | 0.12 | 0.01      | 3    | 2  | 1   |
|          | 80  | 160  | 160  | 0.2    | 0.0      | 0.12 | 0.01      | 28   | 2  | 1   |
|          | 90  | 160  | 160  | 0.2    | 0.0      | 0.11 | 0.01      | 6    | 3  | 1   |
|          | 100 | 160  | 160  | 0.3    | 0.0      | 0.11 | 0.01      | 12   | 3  | 1   |
| Subtotal |     | 1440 | 1440 | 0.1    | 0.0      | 0.20 | 0.01      | 7    | 2  | 1   |
| 45       | 20  | 160  | 160  | 0.1    | 0.0      | 0.71 | 0.12      | 6    | 6  | 7   |
|          | 30  | 160  | 160  | 0.7    | 0.0      | 0.50 | 0.17      | 55   | 6  | 12  |
|          | 40  | 160  | 160  | 2.6    | 0.0      | 0.40 | 0.14      | 214  | 8  | 16  |
|          | 50  | 160  | 159  | 24.5   | 0.1      | 0.37 | 0.15      | 1097 | 8  | 19  |
|          | 60  | 160  | 160  | 7.9    | 0.1      | 0.31 | 0.14      | 220  | 7  | 21  |
|          | 70  | 160  | 160  | 24.9   | 0.1      | 0.29 | 0.15      | 779  | 8  | 24  |
|          | 80  | 160  | 160  | 32.1   | 0.2      | 0.28 | 0.15      | 635  | 7  | 26  |
|          | 90  | 160  | 159  | 78.9   | 0.2      | 0.28 | 0.14      | 1488 | 7  | 27  |
|          | 100 | 160  | 156  | 182.5  | 0.3      | 0.27 | 0.15      | 3177 | 6  | 30  |
| Subtotal |     | 1440 | 1434 | 39.3   | 0.1      | 0.38 | 0.15      | 852  | 7  | 20  |
| 60       | 20  | 160  | 160  | 0.2    | 0.0      | 1.15 | 0.13      | 5    | 13 | 16  |
|          | 30  | 160  | 160  | 1.9    | 0.1      | 0.90 | 0.29      | 43   | 12 | 25  |
|          | 40  | 160  | 160  | 8.3    | 0.1      | 0.75 | 0.30      | 132  | 14 | 32  |
|          | 50  | 160  | 160  | 45.2   | 0.2      | 0.63 | 0.30      | 1021 | 12 | 35  |
|          | 60  | 160  | 159  | 142.9  | 0.4      | 0.60 | 0.32      | 2380 | 15 | 39  |
|          | 70  | 160  | 154  | 323.7  | 0.6      | 0.55 | 0.31      | 4587 | 13 | 40  |
|          | 80  | 160  | 142  | 693.6  | 0.9      | 0.53 | 0.32      | 7339 | 15 | 41  |
|          | 90  | 160  | 143  | 765.3  | 1.2      | 0.48 | 0.30      | 6327 | 13 | 47  |
|          | 100 | 160  | 136  | 1152.7 | 1.5      | 0.48 | 0.32      | 7115 | 12 | 47  |
| Subtotal |     | 1440 | 1374 | 348.2  | 0.6      | 0.67 | 0.29      | 3217 | 13 | 36  |
| 75       | 20  | 160  | 160  | 0.5    | 0.0      | 1.56 | 0.11      | 4    | 18 | 23  |
|          | 30  | 160  | 160  | 4.0    | 0.2      | 1.31 | 0.26      | 22   | 19 | 40  |
|          | 40  | 160  | 160  | 26.0   | 0.4      | 1.19 | 0.37      | 165  | 25 | 46  |
|          | 50  | 160  | 159  | 157.5  | 0.8      | 1.10 | 0.42      | 1008 | 28 | 49  |
|          | 60  | 160  | 155  | 382.2  | 1.4      | 0.91 | 0.42      | 2170 | 26 | 53  |
|          | 70  | 160  | 143  | 892.4  | 2.4      | 0.86 | 0.46      | 4194 | 27 | 56  |
|          | 80  | 160  | 125  | 1426.8 | 3.0      | 0.79 | 0.47      | 5623 | 29 | 57  |
|          | 90  | 160  | 101  | 2036.9 | 4.7      | 0.87 | 0.55      | 5710 | 27 | 60  |
|          | 100 | 160  | 65   | 2712.8 | 6.1      | 0.88 | 0.60      | 6904 | 30 | 64  |
| Subtotal |     | 1440 | 1228 | 848.8  | 2.1      | 1.05 | 0.41      | 2867 | 25 | 50  |
| Total    |     | 5760 | 5476 | 309.1  | 0.7      | 0.58 | 0.21      | 1736 | 12 | 27  |

**Table EC.17 Detailed results of our BPC algorithm for the H&W instances and the combined strategy**

| $Q$      | $n$  | Inst | Opt    | t[s]   | $t^{LP}$ | Gp   | $Gp^{RF}$ | Nds  | CC | SRC |
|----------|------|------|--------|--------|----------|------|-----------|------|----|-----|
| 30       | 20   | 160  | 160    | 0.0    | 0.0      | 0.57 | 0.02      | 2    | 0  | 0   |
|          | 30   | 160  | 160    | 0.0    | 0.0      | 0.34 | 0.02      | 2    | 2  | 0   |
|          | 40   | 160  | 160    | 0.0    | 0.0      | 0.24 | 0.02      | 5    | 2  | 1   |
|          | 50   | 160  | 160    | 0.0    | 0.0      | 0.23 | 0.01      | 2    | 3  | 1   |
|          | 60   | 160  | 160    | 0.1    | 0.0      | 0.21 | 0.01      | 10   | 4  | 1   |
|          | 70   | 160  | 160    | 0.2    | 0.0      | 0.17 | 0.01      | 24   | 4  | 1   |
|          | 80   | 160  | 159    | 22.9   | 0.0      | 0.16 | 0.01      | 123  | 5  | 1   |
|          | 90   | 160  | 159    | 22.8   | 0.0      | 0.14 | 0.01      | 35   | 5  | 1   |
| 100      | 160  | 160  | 0.3    | 0.0    | 0.14     | 0.01 | 14        | 5    | 1  |     |
| Subtotal | 1440 | 1438 |        | 5.2    | 0.0      | 0.24 | 0.02      | 24   | 3  | 1   |
| 45       | 20   | 160  | 160    | 0.1    | 0.0      | 0.93 | 0.20      | 18   | 7  | 8   |
|          | 30   | 160  | 160    | 1.0    | 0.0      | 0.60 | 0.22      | 77   | 7  | 12  |
|          | 40   | 160  | 160    | 1.7    | 0.0      | 0.52 | 0.19      | 58   | 10 | 18  |
|          | 50   | 160  | 160    | 17.2   | 0.1      | 0.49 | 0.23      | 933  | 12 | 21  |
|          | 60   | 160  | 159    | 81.6   | 0.1      | 0.40 | 0.20      | 3769 | 13 | 24  |
|          | 70   | 160  | 158    | 105.2  | 0.1      | 0.35 | 0.19      | 3345 | 14 | 24  |
|          | 80   | 160  | 157    | 157.0  | 0.2      | 0.35 | 0.19      | 3995 | 13 | 29  |
|          | 90   | 160  | 157    | 176.0  | 0.2      | 0.31 | 0.17      | 3176 | 17 | 29  |
| 100      | 160  | 148  | 396.6  | 0.3    | 0.30     | 0.17 | 7161      | 10   | 31 |     |
| Subtotal | 1440 | 1419 |        | 104.1  | 0.1      | 0.47 | 0.20      | 2504 | 12 | 22  |
| 60       | 20   | 160  | 160    | 0.3    | 0.0      | 1.76 | 0.17      | 7    | 16 | 20  |
|          | 30   | 160  | 160    | 2.2    | 0.1      | 1.22 | 0.30      | 68   | 17 | 29  |
|          | 40   | 160  | 160    | 12.9   | 0.1      | 0.98 | 0.32      | 200  | 22 | 36  |
|          | 50   | 160  | 158    | 70.5   | 0.2      | 0.76 | 0.29      | 1958 | 20 | 40  |
|          | 60   | 160  | 157    | 212.4  | 0.4      | 0.73 | 0.32      | 4234 | 24 | 44  |
|          | 70   | 160  | 153    | 411.9  | 0.5      | 0.66 | 0.30      | 6443 | 28 | 48  |
|          | 80   | 160  | 147    | 671.5  | 0.7      | 0.61 | 0.29      | 6860 | 27 | 51  |
|          | 90   | 160  | 137    | 1018.8 | 1.0      | 0.56 | 0.31      | 9098 | 23 | 57  |
| 100      | 160  | 123  | 1456.0 | 1.3    | 0.53     | 0.30 | 10721     | 27   | 58 |     |
| Subtotal | 1440 | 1355 |        | 428.5  | 0.5      | 0.87 | 0.29      | 4399 | 23 | 43  |
| 75       | 20   | 160  | 160    | 0.8    | 0.0      | 2.23 | 0.15      | 8    | 21 | 31  |
|          | 30   | 160  | 160    | 5.9    | 0.2      | 1.73 | 0.29      | 34   | 23 | 47  |
|          | 40   | 160  | 160    | 29.4   | 0.3      | 1.43 | 0.34      | 99   | 30 | 55  |
|          | 50   | 160  | 158    | 153.5  | 0.6      | 1.34 | 0.35      | 980  | 35 | 61  |
|          | 60   | 160  | 155    | 375.6  | 1.0      | 1.09 | 0.37      | 2474 | 38 | 65  |
|          | 70   | 160  | 139    | 898.9  | 1.7      | 0.96 | 0.37      | 5198 | 36 | 74  |
|          | 80   | 160  | 129    | 1364.3 | 2.4      | 0.88 | 0.35      | 5179 | 45 | 79  |
|          | 90   | 160  | 111    | 1854.2 | 3.0      | 0.83 | 0.36      | 6282 | 44 | 82  |
| 100      | 160  | 77   | 2499.2 | 4.3    | 0.85     | 0.43 | 7245      | 42   | 89 |     |
| Subtotal | 1440 | 1249 |        | 798.0  | 1.5      | 1.26 | 0.34      | 3055 | 35 | 65  |
| Total    |      | 5760 | 5461   | 333.9  | 0.5      | 0.71 | 0.21      | 2495 | 18 | 32  |

**Table EC.18 Detailed results of our BPC algorithm for the H&W instances and the optimal strategy**

| $Q$      | $n$  | Inst | Opt | $t[s]$ | $t^{LP}$ | Gp   | $Gp^{RF}$ | Nds  | CC | SRC |
|----------|------|------|-----|--------|----------|------|-----------|------|----|-----|
| 30       | 20   | 160  | 160 | 0.0    | 0.0      | 0.55 | 0.02      | 2    | 1  | 0   |
|          | 30   | 160  | 160 | 0.0    | 0.0      | 0.28 | 0.00      | 2    | 1  | 0   |
|          | 40   | 160  | 160 | 0.0    | 0.0      | 0.22 | 0.01      | 4    | 2  | 1   |
|          | 50   | 160  | 160 | 0.0    | 0.0      | 0.20 | 0.00      | 2    | 1  | 0   |
|          | 60   | 160  | 160 | 0.1    | 0.0      | 0.19 | 0.01      | 3    | 3  | 1   |
|          | 70   | 160  | 160 | 0.1    | 0.0      | 0.14 | 0.01      | 9    | 2  | 1   |
|          | 80   | 160  | 160 | 13.9   | 0.0      | 0.14 | 0.01      | 360  | 3  | 1   |
|          | 90   | 160  | 160 | 0.2    | 0.0      | 0.13 | 0.01      | 5    | 3  | 1   |
|          | 100  | 160  | 160 | 0.4    | 0.0      | 0.12 | 0.01      | 17   | 3  | 1   |
| Subtotal | 1440 | 1440 |     | 1.6    | 0.0      | 0.22 | 0.01      | 45   | 2  | 1   |
| 45       | 20   | 160  | 160 | 0.1    | 0.0      | 0.79 | 0.16      | 9    | 7  | 7   |
|          | 30   | 160  | 160 | 0.5    | 0.0      | 0.51 | 0.17      | 25   | 8  | 13  |
|          | 40   | 160  | 160 | 2.1    | 0.0      | 0.43 | 0.15      | 82   | 10 | 17  |
|          | 50   | 160  | 160 | 5.7    | 0.1      | 0.41 | 0.18      | 204  | 13 | 20  |
|          | 60   | 160  | 160 | 15.7   | 0.1      | 0.34 | 0.18      | 393  | 10 | 23  |
|          | 70   | 160  | 159 | 56.4   | 0.2      | 0.31 | 0.16      | 1487 | 11 | 24  |
|          | 80   | 160  | 157 | 142.6  | 0.2      | 0.29 | 0.16      | 3175 | 10 | 26  |
|          | 90   | 160  | 157 | 140.7  | 0.3      | 0.28 | 0.15      | 2121 | 12 | 27  |
|          | 100  | 160  | 151 | 346.6  | 0.4      | 0.27 | 0.16      | 5071 | 9  | 31  |
| Subtotal | 1440 | 1424 |     | 78.9   | 0.2      | 0.40 | 0.16      | 1396 | 10 | 21  |
| 60       | 20   | 160  | 160 | 0.3    | 0.0      | 1.48 | 0.15      | 6    | 17 | 20  |
|          | 30   | 160  | 160 | 2.0    | 0.1      | 1.03 | 0.26      | 36   | 17 | 28  |
|          | 40   | 160  | 160 | 11.9   | 0.2      | 0.84 | 0.31      | 174  | 22 | 34  |
|          | 50   | 160  | 159 | 64.7   | 0.3      | 0.69 | 0.30      | 1164 | 19 | 38  |
|          | 60   | 160  | 159 | 130.8  | 0.5      | 0.66 | 0.31      | 1272 | 23 | 44  |
|          | 70   | 160  | 152 | 403.6  | 0.7      | 0.60 | 0.31      | 4359 | 26 | 44  |
|          | 80   | 160  | 135 | 951.9  | 1.0      | 0.58 | 0.32      | 8010 | 23 | 48  |
|          | 90   | 160  | 141 | 996.3  | 1.4      | 0.51 | 0.31      | 5375 | 22 | 51  |
|          | 100  | 160  | 120 | 1542.8 | 1.8      | 0.51 | 0.31      | 7930 | 24 | 55  |
| Subtotal | 1440 | 1346 |     | 456.0  | 0.7      | 0.77 | 0.29      | 3147 | 22 | 40  |
| 75       | 20   | 160  | 160 | 0.9    | 0.1      | 1.98 | 0.12      | 5    | 25 | 26  |
|          | 30   | 160  | 160 | 5.4    | 0.2      | 1.56 | 0.25      | 21   | 28 | 41  |
|          | 40   | 160  | 160 | 36.1   | 0.5      | 1.35 | 0.35      | 100  | 36 | 53  |
|          | 50   | 160  | 160 | 162.9  | 0.9      | 1.22 | 0.38      | 798  | 36 | 54  |
|          | 60   | 160  | 157 | 457.1  | 1.5      | 1.03 | 0.39      | 1759 | 40 | 60  |
|          | 70   | 160  | 144 | 878.2  | 2.3      | 0.91 | 0.40      | 3246 | 38 | 64  |
|          | 80   | 160  | 108 | 1835.8 | 3.2      | 0.88 | 0.43      | 5349 | 47 | 69  |
|          | 90   | 160  | 98  | 2099.8 | 4.5      | 0.88 | 0.48      | 5230 | 43 | 71  |
|          | 100  | 160  | 57  | 2838.7 | 5.7      | 0.95 | 0.59      | 6614 | 44 | 77  |
| Subtotal | 1440 | 1204 |     | 923.9  | 2.1      | 1.19 | 0.38      | 2569 | 37 | 57  |
| Total    | 5760 | 5414 |     | 365.1  | 0.7      | 0.65 | 0.21      | 1789 | 18 | 30  |

**Table EC.19** Detailed results of our BPC algorithm for the ZKS instances and the traversal strategy

| $Q$   | $n$ | Inst | Opt | $t[s]$ | $t^{LP}$ | Gp   | $Gp^{RF}$ | Nds   | CC  | SRC |
|-------|-----|------|-----|--------|----------|------|-----------|-------|-----|-----|
| 6     | 200 | 10   | 2   | 2884.8 | 0.1      | 0.18 | 0.06      | 19134 | 128 | 76  |
|       | 300 | 10   | 1   | 3253.7 | 0.3      | 0.13 | 0.03      | 9538  | 147 | 77  |
|       | 400 | 10   | 1   | 3259.1 | 0.6      | 0.15 | 0.03      | 6987  | 140 | 101 |
|       | 500 | 10   | 0   | 3600.0 | 1.3      | 0.16 | 0.03      | 3615  | 152 | 123 |
|       | 600 | 10   | 1   | 3581.2 | 1.9      | 0.15 | 0.02      | 1088  | 151 | 128 |
| 9     | 200 | 10   | 0   | 3600.0 | 0.6      | 0.38 | 0.18      | 3905  | 140 | 121 |
| 12    | 200 | 10   | 0   | 3600.0 | 3.9      | 0.80 | 0.55      | 8663  | 39  | 128 |
| 15    | 200 | 10   | 0   | 3600.0 | 11.9     | 1.54 | 1.09      | 3531  | 61  | 128 |
| Total |     | 80   | 5   | 3422.4 | 2.6      | 0.44 | 0.25      | 7058  | 120 | 110 |

**Table EC.20** Detailed results of our BPC algorithm for the ZKS instances and the return strategy

| $Q$   | $n$ | Inst | Opt | $t[s]$ | $t^{LP}$ | Gp   | $Gp^{RF}$ | Nds   | CC  | SRC |
|-------|-----|------|-----|--------|----------|------|-----------|-------|-----|-----|
| 6     | 200 | 10   | 6   | 1648.2 | 0.1      | 0.24 | 0.07      | 10474 | 92  | 63  |
|       | 300 | 10   | 2   | 3011.2 | 0.3      | 0.15 | 0.04      | 11391 | 133 | 82  |
|       | 400 | 10   | 0   | 3600.0 | 0.7      | 0.15 | 0.05      | 4407  | 155 | 120 |
|       | 500 | 10   | 0   | 3600.0 | 1.2      | 0.13 | 0.05      | 2706  | 150 | 128 |
|       | 600 | 10   | 0   | 3600.0 | 1.9      | 0.13 | 0.04      | 1080  | 138 | 128 |
| 9     | 200 | 10   | 1   | 3344.2 | 0.5      | 0.41 | 0.15      | 4235  | 92  | 123 |
| 12    | 200 | 10   | 0   | 3600.0 | 1.6      | 0.60 | 0.34      | 3552  | 35  | 128 |
| 15    | 200 | 10   | 1   | 3510.9 | 5.8      | 0.82 | 0.49      | 1862  | 20  | 128 |
| Total |     | 80   | 10  | 3239.3 | 1.5      | 0.33 | 0.15      | 4963  | 102 | 112 |

**Table EC.21** Detailed results of our BPC algorithm for the ZKS instances and the midpoint strategy

| $Q$   | $n$ | Inst | Opt | $t[s]$ | $t^{LP}$ | Gp   | $Gp^{RF}$ | Nds   | CC  | SRC |
|-------|-----|------|-----|--------|----------|------|-----------|-------|-----|-----|
| 6     | 200 | 10   | 2   | 2978.5 | 0.1      | 0.18 | 0.06      | 29924 | 111 | 71  |
|       | 300 | 10   | 1   | 3250.6 | 0.4      | 0.16 | 0.03      | 19045 | 147 | 76  |
|       | 400 | 10   | 0   | 3600.0 | 0.8      | 0.16 | 0.04      | 10661 | 147 | 112 |
|       | 500 | 10   | 0   | 3600.0 | 1.6      | 0.16 | 0.04      | 3335  | 160 | 127 |
|       | 600 | 10   | 0   | 3600.0 | 2.5      | 0.16 | 0.04      | 1597  | 160 | 128 |
| 9     | 200 | 10   | 0   | 3600.0 | 0.9      | 0.38 | 0.20      | 5817  | 128 | 128 |
| 12    | 200 | 10   | 0   | 3600.0 | 3.8      | 0.55 | 0.31      | 6797  | 41  | 128 |
| 15    | 200 | 10   | 0   | 3600.0 | 13.2     | 1.46 | 1.05      | 2573  | 64  | 128 |
| Total |     | 80   | 3   | 3478.6 | 2.9      | 0.40 | 0.22      | 9969  | 120 | 112 |

**Table EC.22** Detailed results of our BPC algorithm for the ZKS instances and the largest gap strategy

| $Q$   | $n$ | Inst | Opt | t[s]   | $t^{LP}$ | Gp   | $Gp^{RF}$ | Nds   | CC  | SRC |
|-------|-----|------|-----|--------|----------|------|-----------|-------|-----|-----|
| 6     | 200 | 10   | 4   | 2172.0 | 0.2      | 0.19 | 0.06      | 20578 | 110 | 80  |
|       | 300 | 10   | 0   | 3600.0 | 0.3      | 0.17 | 0.04      | 21082 | 160 | 77  |
|       | 400 | 10   | 1   | 3265.4 | 0.9      | 0.16 | 0.04      | 5841  | 147 | 113 |
|       | 500 | 10   | 0   | 3600.0 | 1.6      | 0.17 | 0.04      | 3282  | 160 | 128 |
|       | 600 | 10   | 0   | 3600.0 | 2.5      | 0.15 | 0.04      | 1402  | 160 | 128 |
| 9     | 200 | 10   | 0   | 3600.0 | 0.8      | 0.35 | 0.18      | 7359  | 128 | 128 |
| 12    | 200 | 10   | 0   | 3600.0 | 4.2      | 0.55 | 0.30      | 8070  | 37  | 128 |
| 15    | 200 | 10   | 0   | 3600.0 | 14.2     | 1.47 | 1.06      | 2533  | 76  | 128 |
| Total |     | 80   | 5   | 3379.7 | 3.1      | 0.40 | 0.22      | 8768  | 122 | 114 |

**Table EC.23** Detailed results of our BPC algorithm for the ZKS instances and the combined strategy

| $Q$   | $n$ | Inst | Opt | t[s]   | $t^{LP}$ | Gp   | $Gp^{RF}$ | Nds   | CC  | SRC |
|-------|-----|------|-----|--------|----------|------|-----------|-------|-----|-----|
| 6     | 200 | 10   | 4   | 2513.2 | 0.2      | 0.16 | 0.07      | 15785 | 116 | 57  |
|       | 300 | 10   | 1   | 3243.9 | 0.4      | 0.15 | 0.04      | 17634 | 120 | 71  |
|       | 400 | 10   | 0   | 3600.0 | 0.8      | 0.13 | 0.03      | 8213  | 146 | 112 |
|       | 500 | 10   | 1   | 3384.2 | 1.4      | 0.12 | 0.03      | 3880  | 158 | 120 |
|       | 600 | 10   | 0   | 3600.0 | 2.3      | 0.12 | 0.04      | 1155  | 159 | 128 |
| 9     | 200 | 10   | 3   | 2675.6 | 0.8      | 0.40 | 0.16      | 8015  | 75  | 117 |
| 12    | 200 | 10   | 0   | 3600.0 | 3.0      | 0.50 | 0.29      | 6920  | 37  | 128 |
| 15    | 200 | 10   | 0   | 3600.0 | 9.9      | 1.15 | 0.83      | 3238  | 33  | 128 |
| Total |     | 80   | 9   | 3277.1 | 2.4      | 0.34 | 0.19      | 8105  | 106 | 108 |

**Table EC.24** Detailed results of our BPC algorithm for the ZKS instances and the optimal strategy

| $Q$   | $n$ | Inst | Opt | t[s]   | $t^{LP}$ | Gp   | $Gp^{RF}$ | Nds   | CC  | SRC |
|-------|-----|------|-----|--------|----------|------|-----------|-------|-----|-----|
| 6     | 200 | 10   | 3   | 2524.3 | 0.2      | 0.20 | 0.08      | 17991 | 105 | 58  |
|       | 300 | 10   | 1   | 3257.2 | 0.5      | 0.16 | 0.05      | 20512 | 129 | 80  |
|       | 400 | 10   | 0   | 3600.0 | 0.9      | 0.13 | 0.04      | 11327 | 146 | 118 |
|       | 500 | 10   | 0   | 3600.0 | 1.8      | 0.10 | 0.04      | 3772  | 147 | 120 |
|       | 600 | 10   | 0   | 3600.0 | 2.7      | 0.12 | 0.04      | 1568  | 155 | 128 |
| 9     | 200 | 10   | 2   | 2991.5 | 1.1      | 0.34 | 0.12      | 4529  | 108 | 116 |
| 12    | 200 | 10   | 0   | 3600.0 | 4.9      | 0.52 | 0.33      | 5249  | 37  | 128 |
| 15    | 200 | 10   | 0   | 3600.0 | 18.5     | 1.19 | 0.89      | 2203  | 39  | 128 |
| Total |     | 80   | 6   | 3346.6 | 3.8      | 0.35 | 0.20      | 8394  | 108 | 109 |

**Table EC.25 Detailed results of our BPC algorithm for the M&ö-ext instances and the traversal strategy**

| $Q$      | $n$ | Inst | Opt    | $t[s]$ | $t^{LP}$ | Gp   | $Gp^{RF}$ | Nds  | CC  | SRC |
|----------|-----|------|--------|--------|----------|------|-----------|------|-----|-----|
| 60       | 20  | 10   | 10     | 13.3   | 0.1      | 6.16 | 0.06      | 4    | 41  | 48  |
|          | 30  | 10   | 10     | 330.1  | 0.9      | 3.35 | 0.34      | 144  | 60  | 85  |
|          | 40  | 10   | 6      | 1590.0 | 2.0      | 3.20 | 0.41      | 298  | 75  | 126 |
|          | 50  | 10   | 7      | 1791.3 | 4.8      | 4.40 | 0.84      | 827  | 64  | 128 |
|          | 60  | 10   | 4      | 2596.3 | 9.6      | 3.98 | 0.94      | 999  | 71  | 124 |
|          | 70  | 10   | 2      | 3090.8 | 15.7     | 2.15 | 0.75      | 1266 | 72  | 128 |
|          | 80  | 10   | 0      | 3600.0 | 26.2     | 2.39 | 0.97      | 1203 | 56  | 128 |
|          | 90  | 10   | 1      | 3262.8 | 36.7     | 2.35 | 0.68      | 1126 | 44  | 128 |
|          | 100 | 10   | 0      | 3600.0 | 48.0     | 2.24 | 0.88      | 683  | 73  | 128 |
| Subtotal | 90  | 40   | 2208.3 | 16.0   | 3.36     | 0.65 | 728       | 62   | 114 |     |
| 72       | 20  | 10   | 10     | 3.8    | 0.2      | 7.55 | 0.02      | 3    | 60  | 23  |
|          | 30  | 10   | 10     | 368.8  | 1.3      | 8.97 | 0.48      | 25   | 108 | 126 |
|          | 40  | 10   | 8      | 841.6  | 3.8      | 6.59 | 0.48      | 47   | 86  | 116 |
|          | 50  | 10   | 4      | 2728.1 | 13.6     | 5.92 |           | 224  | 100 | 93  |
|          | 60  | 10   | 6      | 2141.7 | 24.9     | 4.58 | 0.63      | 234  | 83  | 128 |
|          | 70  | 10   | 2      | 2903.7 | 42.8     | 3.00 |           | 275  | 89  | 120 |
|          | 80  | 10   | 0      | 3600.0 | 60.1     | 3.61 | 0.91      | 386  | 91  | 128 |
|          | 90  | 10   | 1      | 3356.4 | 84.4     | 3.03 | 0.84      | 226  | 114 | 128 |
|          | 100 | 10   | 0      | 3600.0 | 104.4    | 1.99 | 0.51      | 344  | 69  | 128 |
| Subtotal | 90  | 41   | 2171.6 | 37.3   | 5.03     |      | 196       | 89   | 110 |     |
| Total    | 180 | 81   | 2189.9 | 26.6   | 4.19     |      | 462       | 75   | 112 |     |

**Table EC.26** Detailed results of our BPC algorithm for the M&Ö-ext instances and the return strategy

| $Q$      | $n$ | Inst | Opt    | t[s]   | $t^{LP}$ | Gp   | $Gp^{RF}$ | Nds | CC  | SRC |
|----------|-----|------|--------|--------|----------|------|-----------|-----|-----|-----|
| 60       | 20  | 10   | 10     | 1.2    | 0.2      | 4.34 | 0.00      | 2   | 29  | 5   |
|          | 30  | 10   | 10     | 99.2   | 1.5      | 3.15 | 0.06      | 4   | 83  | 86  |
|          | 40  | 10   | 10     | 139.1  | 4.6      | 2.67 | 0.24      | 13  | 66  | 102 |
|          | 50  | 10   | 9      | 535.5  | 11.2     | 3.33 | 0.36      | 29  | 83  | 121 |
|          | 60  | 10   | 5      | 2358.5 | 23.2     | 3.85 | 0.66      | 121 | 130 | 124 |
|          | 70  | 10   | 7      | 1685.2 | 32.5     | 1.93 | 0.57      | 133 | 102 | 124 |
|          | 80  | 10   | 1      | 3371.3 | 62.0     | 2.64 | 1.25      | 457 | 114 | 127 |
|          | 90  | 10   | 2      | 3063.7 | 76.6     | 2.33 | 0.82      | 730 | 73  | 127 |
|          | 100 | 10   | 0      | 3600.0 | 95.2     | 2.58 | 1.25      | 428 | 114 | 128 |
| Subtotal | 90  | 54   | 1650.4 | 34.1   | 2.98     | 0.58 | 213       | 88  | 105 |     |
| 72       | 20  | 10   | 10     | 4.4    | 0.4      | 7.30 | 0.00      | 2   | 81  | 14  |
|          | 30  | 10   | 10     | 74.6   | 4.2      | 7.75 | 0.06      | 3   | 121 | 72  |
|          | 40  | 10   | 10     | 980.8  | 17.2     | 6.01 | 0.31      | 32  | 117 | 97  |
|          | 50  | 10   | 6      | 1760.4 | 62.7     | 4.45 | 0.56      | 60  | 133 | 128 |
|          | 60  | 10   | 3      | 2863.8 | 131.0    | 4.86 |           | 135 | 127 | 128 |
|          | 70  | 10   | 2      | 3227.4 | 169.6    | 3.20 | 1.14      | 142 | 130 | 128 |
|          | 80  | 10   | 1      | 3462.0 | 321.3    | 4.21 | 1.56      | 166 | 131 | 128 |
|          | 90  | 10   | 0      | 3600.0 | 496.7    | 4.50 | 2.29      | 89  | 146 | 128 |
|          | 100 | 10   | 0      | 3600.0 | 545.9    | 4.63 | 2.87      | 115 | 132 | 128 |
| Subtotal | 90  | 42   | 2174.8 | 194.3  | 5.21     |      | 83        | 124 | 106 |     |
| Total    | 180 | 96   | 1912.6 | 114.2  | 4.10     |      | 148       | 106 | 105 |     |

**Table EC.27 Detailed results of our BPC algorithm for the M&ö-ext instances and the midpoint strategy**

| $Q$   | $n$      | Inst | Opt    | $t[s]$ | $t^{LP}$ | Gp   | $Gp^{RF}$ | Nds | CC  | SRC |
|-------|----------|------|--------|--------|----------|------|-----------|-----|-----|-----|
| 60    | 20       | 10   | 10     | 2.3    | 0.3      | 3.96 | 0.00      | 2   | 35  | 24  |
|       | 30       | 10   | 10     | 38.6   | 2.5      | 2.02 | 0.07      | 5   | 62  | 60  |
|       | 40       | 10   | 10     | 81.7   | 8.8      | 2.36 | 0.30      | 18  | 52  | 102 |
|       | 50       | 10   | 10     | 850.1  | 26.8     | 3.32 | 0.58      | 65  | 72  | 114 |
|       | 60       | 10   | 6      | 1760.1 | 49.7     | 3.47 | 0.84      | 207 | 91  | 119 |
|       | 70       | 10   | 3      | 2823.2 | 87.0     | 2.15 | 0.90      | 472 | 80  | 117 |
|       | 80       | 10   | 2      | 3054.8 | 146.5    | 2.42 | 1.27      | 472 | 68  | 123 |
|       | 90       | 10   | 1      | 3357.8 | 196.5    | 2.53 | 1.15      | 658 | 58  | 120 |
|       | 100      | 10   | 0      | 3600.0 | 227.6    | 2.69 | 1.63      | 405 | 101 | 123 |
|       | Subtotal | 90   | 52     | 1729.8 | 82.8     | 2.77 | 0.75      | 256 | 69  | 100 |
| 72    | 20       | 10   | 10     | 5.0    | 0.6      | 6.02 | 0.00      | 2   | 63  | 15  |
|       | 30       | 10   | 10     | 226.4  | 8.5      | 6.34 | 0.16      | 7   | 110 | 87  |
|       | 40       | 10   | 9      | 509.8  | 34.0     | 4.67 | 0.25      | 23  | 93  | 104 |
|       | 50       | 10   | 8      | 1525.1 | 169.4    | 4.00 | 0.50      | 42  | 123 | 127 |
|       | 60       | 10   | 5      | 2326.9 | 332.7    | 4.67 | 1.39      | 90  | 120 | 124 |
|       | 70       | 10   | 2      | 3187.4 | 539.2    | 3.39 |           | 84  | 115 | 117 |
|       | 80       | 10   | 1      | 3529.1 | 1050.3   | 4.95 | 2.53      | 87  | 114 | 128 |
|       | 90       | 10   | 0      | 3600.0 | 1395.7   | 4.73 | 2.74      | 47  | 143 | 128 |
|       | 100      | 10   | 0      | 3600.0 | 1656.8   |      |           | 71  | 114 | 114 |
|       | Subtotal | 90   | 45     | 2056.6 | 576.4    |      |           | 50  | 110 | 105 |
| Total | 180      | 97   | 1893.2 | 329.6  |          |      | 153       | 90  | 103 |     |

**Table EC.28** Detailed results of our BPC algorithm for the M&ö-ext instances and the largest gap strategy

| $Q$   | $n$      | Inst | Opt    | $t[s]$ | $t^{LP}$ | Gp   | $Gp^{RF}$ | Nds | CC  | SRC |
|-------|----------|------|--------|--------|----------|------|-----------|-----|-----|-----|
| 60    | 20       | 10   | 10     | 1.7    | 0.4      | 4.08 | 0.00      | 2   | 23  | 23  |
|       | 30       | 10   | 10     | 60.6   | 4.4      | 2.15 | 0.12      | 4   | 49  | 73  |
|       | 40       | 10   | 10     | 169.9  | 16.1     | 2.55 | 0.37      | 19  | 50  | 113 |
|       | 50       | 10   | 10     | 557.8  | 49.8     | 3.43 | 0.66      | 98  | 62  | 110 |
|       | 60       | 10   | 6      | 2339.4 | 87.4     | 3.62 | 0.94      | 360 | 98  | 112 |
|       | 70       | 10   | 3      | 3145.2 | 148.0    | 2.35 |           | 457 | 88  | 110 |
|       | 80       | 10   | 0      | 3600.0 | 319.2    | 2.57 | 1.38      | 368 | 64  | 117 |
|       | 90       | 10   | 0      | 3600.0 | 314.9    | 2.75 | 1.42      | 694 | 54  | 112 |
|       | 100      | 10   | 0      | 3600.0 | 392.3    | 2.57 | 1.48      | 361 | 95  | 120 |
|       | Subtotal | 90   | 49     | 1897.2 | 148.0    | 2.90 |           | 263 | 65  | 99  |
| 72    | 20       | 10   | 10     | 7.0    | 0.8      | 6.04 | 0.00      | 2   | 69  | 11  |
|       | 30       | 10   | 10     | 249.0  | 18.7     | 6.48 | 0.11      | 9   | 100 | 66  |
|       | 40       | 10   | 10     | 717.2  | 60.4     | 4.59 | 0.27      | 16  | 90  | 91  |
|       | 50       | 10   | 7      | 1798.4 | 300.1    | 4.38 |           | 63  | 113 | 116 |
|       | 60       | 10   | 2      | 3272.1 | 723.2    | 4.79 |           | 148 | 105 | 111 |
|       | 70       | 10   | 0      | 3600.0 | 1109.0   | 3.92 |           | 103 | 106 | 103 |
|       | 80       | 10   | 0      | 3600.0 | 2192.1   |      |           | 44  | 95  | 93  |
|       | 90       | 10   | 0      | 3600.0 | 2614.2   |      |           | 8   | 118 | 69  |
|       | 100      | 10   | 0      | 3600.0 | 2880.7   |      |           | 18  | 74  | 62  |
|       | Subtotal | 90   | 39     | 2271.5 | 1099.9   |      |           | 46  | 97  | 80  |
| Total | 180      | 88   | 2084.4 | 624.0  |          |      | 154       | 81  | 90  |     |

**Table EC.29 Detailed results of our BPC algorithm for the M&ö-ext instances and the combined strategy**

| $Q$      | $n$ | Inst | Opt    | $t[s]$ | $t^{LP}$ | Gp   | $Gp^{RF}$ | Nds  | CC  | SRC |
|----------|-----|------|--------|--------|----------|------|-----------|------|-----|-----|
| 60       | 20  | 10   | 10     | 4.5    | 0.2      | 5.77 | 0.02      | 2    | 43  | 33  |
|          | 30  | 10   | 10     | 215.0  | 1.6      | 3.58 | 0.27      | 9    | 75  | 122 |
|          | 40  | 10   | 10     | 294.5  | 3.9      | 3.09 | 0.33      | 25   | 72  | 122 |
|          | 50  | 10   | 8      | 1387.5 | 9.7      | 4.00 | 0.63      | 152  | 82  | 122 |
|          | 60  | 10   | 5      | 2389.4 | 17.3     | 3.99 | 0.60      | 360  | 112 | 125 |
|          | 70  | 10   | 5      | 2645.1 | 27.3     | 2.33 | 0.75      | 560  | 109 | 128 |
|          | 80  | 10   | 2      | 3107.1 | 42.3     | 2.33 | 0.82      | 623  | 98  | 126 |
|          | 90  | 10   | 1      | 3317.4 | 52.3     | 2.51 | 0.95      | 1205 | 60  | 125 |
|          | 100 | 10   | 0      | 3600.0 | 66.7     | 2.33 | 0.95      | 563  | 110 | 128 |
| Subtotal | 90  | 51   | 1884.5 | 24.6   | 3.33     | 0.59 | 389       | 84   | 114 |     |
| 72       | 20  | 10   | 10     | 9.8    | 0.4      | 7.60 | 0.00      | 2    | 71  | 34  |
|          | 30  | 10   | 10     | 195.5  | 4.2      | 8.45 | 0.18      | 7    | 109 | 71  |
|          | 40  | 10   | 9      | 901.6  | 10.9     | 6.52 | 0.39      | 48   | 123 | 104 |
|          | 50  | 10   | 6      | 1692.2 | 39.7     | 4.51 | 0.56      | 144  | 106 | 128 |
|          | 60  | 10   | 2      | 3074.3 | 78.3     | 4.80 | 0.78      | 220  | 116 | 128 |
|          | 70  | 10   | 3      | 2825.8 | 118.0    | 3.14 | 0.92      | 116  | 119 | 128 |
|          | 80  | 10   | 0      | 3600.0 | 190.8    | 3.95 | 0.92      | 221  | 119 | 128 |
|          | 90  | 10   | 0      | 3600.0 | 234.9    | 4.60 | 2.22      | 120  | 146 | 128 |
|          | 100 | 10   | 1      | 3316.4 | 280.2    | 3.08 | 1.37      | 149  | 114 | 128 |
| Subtotal | 90  | 41   | 2135.1 | 106.4  | 5.18     | 0.82 | 114       | 114  | 109 |     |
| Total    | 180 | 92   | 2009.8 | 65.5   | 4.25     | 0.70 | 252       | 99   | 112 |     |

**Table EC.30 Detailed results of our BPC algorithm for the M&ö-ext instances and the optimal strategy**

| $Q$   | $n$      | Inst | Opt    | $t[s]$ | $t^{LP}$ | Gp   | $Gp^{RF}$ | Nds | CC  | SRC |
|-------|----------|------|--------|--------|----------|------|-----------|-----|-----|-----|
| 60    | 20       | 10   | 10     | 7.7    | 0.5      | 5.44 | 0.00      | 2   | 44  | 24  |
|       | 30       | 10   | 10     | 444.3  | 4.0      | 3.35 | 0.29      | 10  | 78  | 116 |
|       | 40       | 10   | 9      | 745.6  | 12.1     | 3.14 | 0.57      | 80  | 68  | 110 |
|       | 50       | 10   | 8      | 1112.2 | 32.3     | 3.67 | 0.53      | 68  | 82  | 108 |
|       | 60       | 10   | 6      | 2403.0 | 61.0     | 3.85 | 0.67      | 244 | 110 | 121 |
|       | 70       | 10   | 2      | 3220.8 | 79.6     | 2.44 |           | 522 | 103 | 123 |
|       | 80       | 10   | 0      | 3600.0 | 155.5    | 2.58 | 1.15      | 464 | 95  | 124 |
|       | 90       | 10   | 1      | 3402.8 | 154.1    | 2.44 | 0.98      | 721 | 66  | 127 |
|       | 100      | 10   | 0      | 3600.0 | 215.7    | 2.44 | 1.09      | 311 | 120 | 128 |
|       | Subtotal | 90   | 46     | 2059.6 | 79.4     | 3.26 |           | 269 | 85  | 109 |
| 72    | 20       | 10   | 10     | 29.8   | 1.1      | 7.90 | 0.00      | 2   | 95  | 42  |
|       | 30       | 10   | 10     | 1010.6 | 13.8     | 8.16 | 0.34      | 42  | 127 | 84  |
|       | 40       | 10   | 10     | 487.2  | 38.7     | 5.81 | 0.26      | 15  | 116 | 127 |
|       | 50       | 10   | 8      | 1417.6 | 154.9    | 4.31 | 0.50      | 54  | 112 | 126 |
|       | 60       | 10   | 6      | 2216.9 | 306.0    | 4.59 |           | 60  | 117 | 115 |
|       | 70       | 10   | 0      | 3600.0 | 377.1    | 3.67 |           | 148 | 122 | 94  |
|       | 80       | 10   | 0      | 3600.0 | 734.3    | 4.50 |           | 124 | 125 | 116 |
|       | 90       | 10   | 0      | 3600.0 | 883.5    | 5.06 |           | 59  | 146 | 112 |
|       | 100      | 10   | 0      | 3600.0 | 1070.4   | 5.25 |           | 91  | 112 | 115 |
|       | Subtotal | 90   | 44     | 2173.6 | 397.7    | 5.47 |           | 66  | 119 | 104 |
| Total | 180      | 90   | 2116.6 | 238.6  | 4.37     |      | 168       | 102 | 106 |     |

**Table EC.31** Detailed results of our BPC algorithm for the *w&g-g* instances and the traversal strategy

| $Q$   | $n$      | Inst | Opt    | $t[s]$ | $t^{LP}$ | Gp   | $Gp^{RF}$ | Nds   | CC  | SRC |
|-------|----------|------|--------|--------|----------|------|-----------|-------|-----|-----|
| 24    | 125      | 10   | 5      | 2259.2 | 0.7      | 0.57 | 0.30      | 19047 | 20  | 71  |
|       | 150      | 10   | 4      | 2564.5 | 1.1      | 0.44 | 0.26      | 14542 | 23  | 81  |
|       | 175      | 10   | 3      | 2733.7 | 2.0      | 0.36 | 0.24      | 12180 | 18  | 83  |
|       | 200      | 10   | 0      | 3600.0 | 2.5      | 0.44 | 0.30      | 6009  | 38  | 92  |
|       | 225      | 10   | 0      | 3600.0 | 5.6      | 0.45 | 0.32      | 5569  | 36  | 113 |
|       | 250      | 10   | 0      | 3600.0 | 5.0      | 0.48 | 0.36      | 2742  | 60  | 123 |
|       | Subtotal | 60   | 12     | 3059.6 | 2.8      | 0.46 | 0.30      | 10015 | 32  | 94  |
| 36    | 125      | 10   | 0      | 3600.0 | 5.9      | 1.12 | 0.57      | 6002  | 51  | 119 |
|       | 150      | 10   | 0      | 3600.0 | 9.6      | 0.95 | 0.51      | 5023  | 28  | 126 |
|       | 175      | 10   | 0      | 3600.0 | 15.0     | 1.29 | 0.98      | 3349  | 27  | 128 |
|       | 200      | 10   | 0      | 3600.0 | 21.1     | 1.21 | 0.89      | 1936  | 51  | 128 |
|       | 225      | 10   | 0      | 3600.0 | 35.0     | 1.07 | 0.83      | 1303  | 38  | 128 |
|       | 250      | 10   | 0      | 3600.0 | 43.2     | 1.22 | 0.94      | 994   | 41  | 128 |
|       | Subtotal | 60   | 0      | 3600.0 | 21.6     | 1.15 | 0.79      | 3101  | 39  | 126 |
| 48    | 125      | 10   | 1      | 3445.3 | 32.9     | 1.72 | 0.82      | 1579  | 69  | 128 |
|       | 150      | 10   | 0      | 3600.0 | 47.5     | 1.48 | 1.03      | 1625  | 50  | 128 |
|       | 175      | 10   | 0      | 3600.0 | 74.4     | 1.25 | 0.98      | 1873  | 39  | 128 |
|       | 200      | 10   | 0      | 3600.0 | 106.0    | 1.44 | 1.03      | 510   | 84  | 128 |
|       | 225      | 10   | 0      | 3600.0 | 178.6    | 1.84 | 1.43      | 550   | 44  | 128 |
|       | 250      | 10   | 0      | 3600.0 | 222.9    | 1.50 | 1.29      | 627   | 25  | 128 |
|       | Subtotal | 60   | 1      | 3574.2 | 110.4    | 1.54 | 1.10      | 1127  | 52  | 128 |
| 60    | 125      | 10   | 0      | 3600.0 | 99.2     | 2.04 | 0.88      | 483   | 87  | 128 |
|       | 150      | 10   | 0      | 3600.0 | 168.2    | 2.23 | 1.21      | 462   | 70  | 128 |
|       | 175      | 10   | 0      | 3600.0 | 263.6    | 2.59 |           | 220   | 86  | 111 |
|       | 200      | 10   | 0      | 3600.0 | 385.6    | 3.13 |           | 281   | 84  | 102 |
|       | 225      | 10   | 0      | 3600.0 | 971.7    |      |           | 105   | 97  | 115 |
|       | 250      | 10   | 0      | 3600.0 | 808.0    | 3.48 | 2.87      | 96    | 87  | 128 |
|       | Subtotal | 60   | 0      | 3600.0 | 449.4    |      |           | 275   | 85  | 119 |
| 72    | 125      | 10   | 0      | 3600.0 | 290.4    | 2.90 | 1.53      | 194   | 85  | 128 |
|       | 150      | 10   | 0      | 3600.0 | 816.3    |      |           | 134   | 76  | 102 |
|       | 175      | 10   | 0      | 3600.0 | 2194.3   |      |           | 75    | 25  | 64  |
|       | 200      | 10   | 0      | 3600.0 | 2100.3   |      |           | 68    | 39  | 64  |
|       | 225      | 10   | 0      | 3600.0 | 3130.3   |      |           | 8     | 38  | 38  |
|       | 250      | 10   | 0      | 3600.0 | 2840.8   |      |           | 33    | 22  | 64  |
|       | Subtotal | 60   | 0      | 3600.0 | 1895.4   |      |           | 85    | 48  | 77  |
| Total | 300      | 13   | 3486.8 | 495.9  |          |      | 2921      | 51    | 109 |     |

**Table EC.32 Detailed results of our BPC algorithm for the *w&g-g* instances and the return strategy**

| $Q$   | $n$      | Inst | Opt    | $t[s]$ | $t^{LP}$ | Gp   | $Gp^{RF}$ | Nds  | CC  | SRC |
|-------|----------|------|--------|--------|----------|------|-----------|------|-----|-----|
| 24    | 125      | 10   | 8      | 1423.7 | 0.7      | 0.48 | 0.27      | 5781 | 23  | 61  |
|       | 150      | 10   | 7      | 1845.8 | 1.1      | 0.39 | 0.25      | 5286 | 16  | 62  |
|       | 175      | 10   | 1      | 3508.7 | 1.5      | 0.43 | 0.29      | 9694 | 40  | 68  |
|       | 200      | 10   | 0      | 3600.0 | 2.1      | 0.44 | 0.32      | 5054 | 48  | 76  |
|       | 225      | 10   | 0      | 3600.0 | 4.2      | 0.46 | 0.34      | 3945 | 38  | 84  |
|       | 250      | 10   | 0      | 3600.0 | 4.9      | 0.48 | 0.38      | 3494 | 35  | 83  |
|       | Subtotal | 60   | 16     | 2929.7 | 2.4      | 0.45 | 0.31      | 5542 | 33  | 72  |
| 36    | 125      | 10   | 1      | 3489.9 | 5.8      | 1.14 | 0.56      | 2254 | 81  | 111 |
|       | 150      | 10   | 0      | 3600.0 | 9.5      | 1.34 | 0.84      | 2239 | 61  | 112 |
|       | 175      | 10   | 0      | 3600.0 | 14.9     | 1.27 | 0.92      | 2074 | 56  | 115 |
|       | 200      | 10   | 0      | 3600.0 | 21.2     | 1.48 | 1.12      | 884  | 71  | 123 |
|       | 225      | 10   | 0      | 3600.0 | 33.3     | 1.43 | 1.17      | 765  | 52  | 127 |
|       | 250      | 10   | 0      | 3600.0 | 39.8     | 1.49 | 1.26      | 660  | 56  | 128 |
|       | Subtotal | 60   | 1      | 3581.6 | 20.7     | 1.36 | 0.98      | 1479 | 63  | 119 |
| 48    | 125      | 10   | 0      | 3600.0 | 39.9     | 1.74 | 0.94      | 1015 | 98  | 124 |
|       | 150      | 10   | 0      | 3600.0 | 58.9     | 1.46 | 1.00      | 1114 | 69  | 124 |
|       | 175      | 10   | 0      | 3600.0 | 103.1    | 1.82 | 1.48      | 596  | 74  | 126 |
|       | 200      | 10   | 0      | 3600.0 | 130.7    | 1.99 | 1.58      | 284  | 117 | 128 |
|       | 225      | 10   | 0      | 3600.0 | 222.6    | 2.91 | 2.44      | 236  | 93  | 128 |
|       | 250      | 10   | 0      | 3600.0 | 260.9    | 1.94 | 1.66      | 168  | 96  | 128 |
|       | Subtotal | 60   | 0      | 3600.0 | 136.0    | 1.98 | 1.52      | 569  | 91  | 126 |
| 60    | 125      | 10   | 0      | 3600.0 | 242.5    | 3.07 | 2.00      | 275  | 131 | 128 |
|       | 150      | 10   | 0      | 3600.0 | 461.2    | 2.82 | 1.94      | 367  | 83  | 128 |
|       | 175      | 10   | 0      | 3600.0 | 1203.4   |      |           | 106  | 103 | 102 |
|       | 200      | 10   | 0      | 3600.0 | 1405.8   |      |           | 136  | 70  | 102 |
|       | 225      | 10   | 0      | 3600.0 | 2814.4   |      |           | 14   | 43  | 38  |
|       | 250      | 10   | 0      | 3600.0 | 3046.7   |      |           | 10   | 35  | 38  |
|       | Subtotal | 60   | 0      | 3600.0 | 1529.0   |      |           | 151  | 77  | 90  |
| 72    | 125      | 10   | 0      | 3600.0 | 1938.5   |      |           | 68   | 92  | 90  |
|       | 150      | 10   | 0      | 3600.0 | 2974.9   |      |           | 18   | 56  | 38  |
|       | 175      | 10   | 0      | 3600.0 | 3408.6   |      |           | 10   | 10  | 26  |
|       | 200      | 10   | 0      | 3600.0 | 3600.0   |      |           | 0    | 0   | 0   |
|       | 225      | 10   | 0      | 3600.0 | 3600.0   |      |           | 0    | 0   | 0   |
|       | 250      | 10   | 0      | 3600.0 | 3600.0   |      |           | 0    | 0   | 0   |
|       | Subtotal | 60   | 0      | 3600.0 | 3187.0   |      |           | 16   | 26  | 26  |
| Total | 300      | 17   | 3462.3 | 975.0  |          |      | 1552      | 58   | 87  |     |

**Table EC.33** Detailed results of our BPC algorithm for the *w&g-g* instances and the midpoint strategy

| $Q$   | $n$      | Inst | Opt | $t[s]$ | $t^{LP}$ | Gp   | $Gp^{RF}$ | Nds   | CC | SRC |
|-------|----------|------|-----|--------|----------|------|-----------|-------|----|-----|
| 24    | 125      | 10   | 6   | 1694.5 | 0.8      | 0.50 | 0.32      | 9695  | 16 | 54  |
|       | 150      | 10   | 7   | 2458.0 | 1.2      | 0.37 | 0.23      | 11454 | 22 | 59  |
|       | 175      | 10   | 5   | 3076.1 | 2.0      | 0.34 | 0.24      | 7997  | 25 | 66  |
|       | 200      | 10   | 1   | 3484.8 | 2.6      | 0.36 | 0.27      | 7086  | 23 | 71  |
|       | 225      | 10   | 0   | 3600.0 | 5.3      | 0.43 | 0.34      | 6644  | 11 | 80  |
|       | 250      | 10   | 0   | 3600.0 | 5.6      | 0.42 | 0.33      | 3475  | 21 | 95  |
|       | Subtotal | 60   | 19  | 2985.6 | 2.9      | 0.40 | 0.29      | 7725  | 19 | 71  |
| 36    | 125      | 10   | 4   | 2985.8 | 8.4      | 0.92 | 0.52      | 3840  | 29 | 96  |
|       | 150      | 10   | 0   | 3600.0 | 12.9     | 1.12 | 0.70      | 3319  | 29 | 101 |
|       | 175      | 10   | 0   | 3600.0 | 19.7     | 1.25 | 0.94      | 2121  | 33 | 110 |
|       | 200      | 10   | 0   | 3600.0 | 28.8     | 1.10 | 0.81      | 1444  | 23 | 117 |
|       | 225      | 10   | 0   | 3600.0 | 47.0     | 1.23 | 1.02      | 1284  | 20 | 124 |
|       | 250      | 10   | 0   | 3600.0 | 52.7     | 1.41 | 1.18      | 826   | 26 | 123 |
|       | Subtotal | 60   | 4   | 3497.6 | 28.3     | 1.17 | 0.86      | 2139  | 27 | 112 |
| 48    | 125      | 10   | 1   | 3561.2 | 67.0     | 1.47 | 0.86      | 1670  | 36 | 113 |
|       | 150      | 10   | 0   | 3600.0 | 95.2     | 1.98 | 1.54      | 1115  | 39 | 122 |
|       | 175      | 10   | 0   | 3600.0 | 150.9    | 2.03 | 1.79      | 825   | 36 | 125 |
|       | 200      | 10   | 0   | 3600.0 | 238.1    | 1.97 | 1.61      | 360   | 68 | 128 |
|       | 225      | 10   | 0   | 3600.0 | 348.8    | 2.46 | 2.12      | 390   | 31 | 128 |
|       | 250      | 10   | 0   | 3600.0 | 425.2    | 2.18 | 1.91      | 248   | 54 | 128 |
|       | Subtotal | 60   | 1   | 3593.5 | 220.9    | 2.01 | 1.64      | 768   | 44 | 124 |
| 60    | 125      | 10   | 0   | 3600.0 | 593.4    | 2.42 | 1.55      | 287   | 97 | 126 |
|       | 150      | 10   | 0   | 3600.0 | 941.7    | 3.10 | 2.37      | 280   | 50 | 125 |
|       | 175      | 10   | 0   | 3600.0 | 1993.7   |      |           | 76    | 83 | 102 |
|       | 200      | 10   | 0   | 3600.0 | 2026.9   | 7.16 | 6.69      | 77    | 73 | 127 |
|       | 225      | 10   | 0   | 3600.0 | 3393.6   |      |           | 5     | 12 | 20  |
|       | 250      | 10   | 0   | 3600.0 | 3452.8   |      |           | 2     | 16 | 26  |
|       | Subtotal | 60   | 0   | 3600.0 | 2067.0   |      |           | 121   | 55 | 88  |
| 72    | 125      | 10   | 0   | 3600.0 | 3055.6   |      |           | 32    | 38 | 49  |
|       | 150      | 10   | 0   | 3600.0 | 3591.8   |      |           | 0     | 2  | 13  |
|       | 175      | 10   | 0   | 3600.0 | 3600.0   |      |           | 0     | 0  | 0   |
|       | 200      | 10   | 0   | 3600.0 | 3600.0   |      |           | 0     | 0  | 0   |
|       | 225      | 10   | 0   | 3600.0 | 3600.0   |      |           | 0     | 0  | 0   |
|       | 250      | 10   | 0   | 3600.0 | 3600.0   |      |           | 0     | 0  | 0   |
|       | Subtotal | 60   | 0   | 3600.0 | 3507.9   |      |           | 5     | 7  | 10  |
| Total |          | 300  | 24  | 3455.3 | 1165.4   |      |           | 2152  | 30 | 81  |

**Table EC.34** Detailed results of our BPC algorithm for the *w&g-g* instances and the largest gap strategy

| $Q$   | $n$      | Inst | Opt    | $t[s]$ | $t^{LP}$ | Gp   | $Gp^{RF}$ | Nds  | CC | SRC |
|-------|----------|------|--------|--------|----------|------|-----------|------|----|-----|
| 24    | 125      | 10   | 7      | 1557.1 | 0.9      | 0.45 | 0.25      | 7845 | 15 | 49  |
|       | 150      | 10   | 7      | 2043.3 | 1.3      | 0.42 | 0.27      | 7625 | 14 | 62  |
|       | 175      | 10   | 3      | 3169.5 | 2.1      | 0.42 | 0.32      | 7396 | 22 | 66  |
|       | 200      | 10   | 0      | 3600.0 | 2.9      | 0.36 | 0.27      | 8043 | 17 | 73  |
|       | 225      | 10   | 0      | 3600.0 | 4.8      | 0.44 | 0.33      | 4892 | 14 | 86  |
|       | 250      | 10   | 0      | 3600.0 | 6.6      | 0.43 | 0.37      | 4093 | 10 | 87  |
|       | Subtotal | 60   | 17     | 2928.3 | 3.1      | 0.42 | 0.30      | 6649 | 16 | 70  |
| 36    | 125      | 10   | 1      | 3367.5 | 10.3     | 1.01 | 0.60      | 4941 | 26 | 88  |
|       | 150      | 10   | 0      | 3600.0 | 15.3     | 1.15 | 0.76      | 3505 | 19 | 94  |
|       | 175      | 10   | 0      | 3600.0 | 24.9     | 1.38 | 1.08      | 1838 | 26 | 109 |
|       | 200      | 10   | 0      | 3600.0 | 33.1     | 1.26 | 0.99      | 1360 | 24 | 118 |
|       | 225      | 10   | 0      | 3600.0 | 51.2     | 1.32 | 1.13      | 1139 | 24 | 121 |
|       | 250      | 10   | 0      | 3600.0 | 61.8     | 1.41 | 1.20      | 729  | 20 | 125 |
|       | Subtotal | 60   | 1      | 3561.3 | 32.8     | 1.26 | 0.96      | 2252 | 23 | 109 |
| 48    | 125      | 10   | 0      | 3600.0 | 96.6     | 2.05 | 1.42      | 1181 | 48 | 113 |
|       | 150      | 10   | 0      | 3600.0 | 142.8    | 1.93 | 1.48      | 964  | 34 | 122 |
|       | 175      | 10   | 0      | 3600.0 | 219.2    | 1.78 | 1.52      | 542  | 37 | 127 |
|       | 200      | 10   | 0      | 3600.0 | 318.2    | 1.91 | 1.55      | 327  | 58 | 128 |
|       | 225      | 10   | 0      | 3600.0 | 662.2    | 2.52 | 2.17      | 314  | 30 | 126 |
|       | 250      | 10   | 0      | 3600.0 | 578.8    | 2.31 | 2.06      | 191  | 53 | 128 |
|       | Subtotal | 60   | 0      | 3600.0 | 336.3    | 2.08 | 1.70      | 587  | 43 | 124 |
| 60    | 125      | 10   | 0      | 3600.0 | 985.3    | 3.15 | 2.33      | 227  | 79 | 122 |
|       | 150      | 10   | 0      | 3600.0 | 1520.5   | 3.48 | 2.74      | 166  | 52 | 128 |
|       | 175      | 10   | 0      | 3600.0 | 2421.3   |      |           | 57   | 91 | 103 |
|       | 200      | 10   | 0      | 3600.0 | 3035.0   |      |           | 16   | 65 | 70  |
|       | 225      | 10   | 0      | 3600.0 | 3555.9   |      |           | 0    | 7  | 13  |
|       | 250      | 10   | 0      | 3600.0 | 3600.0   |      |           | 0    | 0  | 0   |
|       | Subtotal | 60   | 0      | 3600.0 | 2519.7   |      |           | 78   | 49 | 72  |
| 72    | 125      | 10   | 0      | 3600.0 | 3542.2   |      |           | 3    | 4  | 26  |
|       | 150      | 10   | 0      | 3600.0 | 3600.0   |      |           | 0    | 0  | 0   |
|       | 175      | 10   | 0      | 3600.0 | 3600.0   |      |           | 0    | 0  | 0   |
|       | 200      | 10   | 0      | 3600.0 | 3600.0   |      |           | 0    | 0  | 0   |
|       | 225      | 10   | 0      | 3600.0 | 3600.0   |      |           | 0    | 0  | 0   |
|       | 250      | 10   | 0      | 3600.0 | 3600.0   |      |           | 0    | 0  | 0   |
|       | Subtotal | 60   | 0      | 3600.0 | 3590.4   |      |           | 0    | 1  | 4   |
| Total | 300      | 18   | 3457.9 | 1296.4 |          |      |           | 1913 | 26 | 76  |

**Table EC.35 Detailed results of our BPC algorithm for the *w&g*-g instances and the combined strategy**

| $Q$   | $n$      | Inst | Opt    | $t[s]$ | $t^{LP}$ | Gp   | $Gp^{RF}$ | Nds  | CC  | SRC |
|-------|----------|------|--------|--------|----------|------|-----------|------|-----|-----|
| 24    | 125      | 10   | 7      | 1974.4 | 0.8      | 0.56 | 0.30      | 8877 | 32  | 57  |
|       | 150      | 10   | 5      | 2624.6 | 1.2      | 0.41 | 0.25      | 9788 | 26  | 76  |
|       | 175      | 10   | 3      | 3164.7 | 1.8      | 0.37 | 0.25      | 7062 | 26  | 77  |
|       | 200      | 10   | 0      | 3600.0 | 2.8      | 0.41 | 0.29      | 5734 | 34  | 85  |
|       | 225      | 10   | 0      | 3600.0 | 5.1      | 0.46 | 0.34      | 4413 | 29  | 93  |
|       | 250      | 10   | 1      | 3576.3 | 6.0      | 0.46 | 0.36      | 2895 | 53  | 112 |
|       | Subtotal | 60   | 16     | 3090.0 | 2.9      | 0.45 | 0.30      | 6462 | 33  | 84  |
| 36    | 125      | 10   | 1      | 3518.5 | 6.9      | 1.15 | 0.59      | 3545 | 55  | 117 |
|       | 150      | 10   | 0      | 3600.0 | 10.4     | 1.20 | 0.67      | 2953 | 48  | 117 |
|       | 175      | 10   | 0      | 3600.0 | 15.6     | 1.38 | 1.01      | 2443 | 28  | 128 |
|       | 200      | 10   | 0      | 3600.0 | 22.2     | 1.39 | 1.01      | 962  | 57  | 126 |
|       | 225      | 10   | 0      | 3600.0 | 35.6     | 1.11 | 0.87      | 1012 | 33  | 128 |
|       | 250      | 10   | 0      | 3600.0 | 42.0     | 1.31 | 1.07      | 784  | 36  | 128 |
|       | Subtotal | 60   | 1      | 3586.4 | 22.1     | 1.26 | 0.87      | 1950 | 43  | 124 |
| 48    | 125      | 10   | 0      | 3600.0 | 30.3     | 1.72 | 0.93      | 1351 | 71  | 128 |
|       | 150      | 10   | 0      | 3600.0 | 50.4     | 1.36 | 0.92      | 1278 | 52  | 126 |
|       | 175      | 10   | 0      | 3600.0 | 76.1     | 1.83 | 1.48      | 771  | 46  | 128 |
|       | 200      | 10   | 0      | 3600.0 | 112.7    | 1.73 | 1.34      | 386  | 80  | 128 |
|       | 225      | 10   | 0      | 3600.0 | 181.2    | 2.55 | 2.07      | 326  | 75  | 128 |
|       | 250      | 10   | 0      | 3600.0 | 205.2    | 2.18 | 1.91      | 303  | 60  | 128 |
|       | Subtotal | 60   | 0      | 3600.0 | 109.3    | 1.90 | 1.44      | 736  | 64  | 128 |
| 60    | 125      | 10   | 0      | 3600.0 | 142.0    | 2.41 | 1.33      | 446  | 108 | 128 |
|       | 150      | 10   | 0      | 3600.0 | 543.7    |      |           | 442  | 46  | 115 |
|       | 175      | 10   | 0      | 3600.0 | 992.0    |      |           | 185  | 77  | 102 |
|       | 200      | 10   | 0      | 3600.0 | 1137.3   |      |           | 151  | 57  | 102 |
|       | 225      | 10   | 0      | 3600.0 | 1332.3   |      |           | 56   | 98  | 102 |
|       | 250      | 10   | 0      | 3600.0 | 1913.5   |      |           | 46   | 56  | 77  |
|       | Subtotal | 60   | 0      | 3600.0 | 1010.1   |      |           | 221  | 74  | 105 |
| 72    | 125      | 10   | 0      | 3600.0 | 849.0    |      |           | 125  | 113 | 113 |
|       | 150      | 10   | 0      | 3600.0 | 1495.6   |      |           | 60   | 110 | 90  |
|       | 175      | 10   | 0      | 3600.0 | 2158.2   |      |           | 49   | 55  | 77  |
|       | 200      | 10   | 0      | 3600.0 | 2425.2   |      |           | 27   | 66  | 77  |
|       | 225      | 10   | 0      | 3600.0 | 3514.7   |      |           | 0    | 2   | 13  |
|       | 250      | 10   | 0      | 3600.0 | 3299.9   |      |           | 4    | 18  | 51  |
|       | Subtotal | 60   | 0      | 3600.0 | 2290.4   |      |           | 44   | 61  | 70  |
| Total | 300      | 17   | 3495.3 | 687.0  |          |      |           | 1882 | 55  | 102 |

**Table EC.36** Detailed results of our BPC algorithm for the *w&g-g* instances and the optimal strategy

| $Q$   | $n$      | Inst | Opt    | $t[s]$ | $t^{LP}$ | Gp   | $Gp^{RF}$ | Nds  | CC | SRC |
|-------|----------|------|--------|--------|----------|------|-----------|------|----|-----|
| 24    | 125      | 10   | 7      | 1730.9 | 1.2      | 0.48 | 0.24      | 8323 | 19 | 59  |
|       | 150      | 10   | 5      | 2410.4 | 2.0      | 0.38 | 0.24      | 8146 | 13 | 69  |
|       | 175      | 10   | 4      | 2671.1 | 2.9      | 0.43 | 0.30      | 5237 | 25 | 66  |
|       | 200      | 10   | 0      | 3600.0 | 3.9      | 0.46 | 0.34      | 5483 | 26 | 84  |
|       | 225      | 10   | 0      | 3600.0 | 7.0      | 0.44 | 0.32      | 4440 | 20 | 89  |
|       | 250      | 10   | 0      | 3600.0 | 8.1      | 0.52 | 0.44      | 3172 | 23 | 98  |
|       | Subtotal | 60   | 16     | 2935.4 | 4.2      | 0.45 | 0.31      | 5800 | 21 | 78  |
| 36    | 125      | 10   | 0      | 3600.0 | 12.5     | 1.21 | 0.65      | 2387 | 65 | 112 |
|       | 150      | 10   | 0      | 3600.0 | 19.2     | 1.22 | 0.72      | 2138 | 44 | 113 |
|       | 175      | 10   | 0      | 3600.0 | 28.2     | 1.41 | 1.03      | 1552 | 31 | 123 |
|       | 200      | 10   | 0      | 3600.0 | 39.3     | 1.40 | 1.05      | 861  | 45 | 124 |
|       | 225      | 10   | 0      | 3600.0 | 59.7     | 1.26 | 1.03      | 871  | 27 | 128 |
|       | 250      | 10   | 0      | 3600.0 | 70.2     | 1.59 | 1.36      | 647  | 32 | 128 |
|       | Subtotal | 60   | 0      | 3600.0 | 38.2     | 1.35 | 0.97      | 1409 | 41 | 122 |
| 48    | 125      | 10   | 0      | 3600.0 | 79.8     | 1.86 | 1.13      | 915  | 68 | 127 |
|       | 150      | 10   | 0      | 3600.0 | 110.1    | 1.55 | 1.12      | 818  | 54 | 128 |
|       | 175      | 10   | 0      | 3600.0 | 184.6    | 2.12 | 1.77      | 528  | 50 | 128 |
|       | 200      | 10   | 0      | 3600.0 | 263.8    | 2.07 | 1.65      | 266  | 81 | 128 |
|       | 225      | 10   | 0      | 3600.0 | 385.8    | 3.15 | 2.69      | 268  | 60 | 128 |
|       | 250      | 10   | 0      | 3600.0 | 473.1    | 2.19 | 1.92      | 175  | 70 | 128 |
|       | Subtotal | 60   | 0      | 3600.0 | 249.5    | 2.16 | 1.71      | 495  | 64 | 128 |
| 60    | 125      | 10   | 0      | 3600.0 | 1051.2   |      |           | 210  | 90 | 102 |
|       | 150      | 10   | 0      | 3600.0 | 729.0    | 2.69 | 1.78      | 248  | 62 | 128 |
|       | 175      | 10   | 0      | 3600.0 | 1806.6   |      |           | 84   | 68 | 90  |
|       | 200      | 10   | 0      | 3600.0 | 2131.9   |      |           | 59   | 64 | 90  |
|       | 225      | 10   | 0      | 3600.0 | 2829.9   |      |           | 10   | 66 | 60  |
|       | 250      | 10   | 0      | 3600.0 | 3209.1   |      |           | 2    | 49 | 31  |
|       | Subtotal | 60   | 0      | 3600.0 | 1959.6   |      |           | 102  | 66 | 83  |
| 72    | 125      | 10   | 0      | 3600.0 | 2676.0   |      |           | 37   | 52 | 39  |
|       | 150      | 10   | 0      | 3600.0 | 3094.1   |      |           | 19   | 34 | 38  |
|       | 175      | 10   | 0      | 3600.0 | 3530.3   |      |           | 2    | 8  | 26  |
|       | 200      | 10   | 0      | 3600.0 | 3600.0   |      |           | 0    | 0  | 0   |
|       | 225      | 10   | 0      | 3600.0 | 3600.0   |      |           | 0    | 0  | 0   |
|       | 250      | 10   | 0      | 3600.0 | 3600.0   |      |           | 0    | 0  | 0   |
|       | Subtotal | 60   | 0      | 3600.0 | 3350.1   |      |           | 10   | 16 | 17  |
| Total | 300      | 16   | 3467.1 | 1120.3 |          |      |           | 1563 | 42 | 86  |

**Table EC.37** Detailed results of our BPC algorithm for the *W&G-u* instances and the traversal strategy

| $Q$      | $n$ | Inst | Opt | $t[s]$ | $t^{LP}$ | Gp   | $Gp^{RF}$ | Nds   | CC  | SRC |
|----------|-----|------|-----|--------|----------|------|-----------|-------|-----|-----|
| 24       | 100 | 10   | 10  | 77.8   | 0.3      | 0.36 | 0.21      | 688   | 0   | 61  |
|          | 150 | 10   | 7   | 1447.1 | 1.0      | 0.37 | 0.18      | 4133  | 28  | 74  |
|          | 200 | 10   | 6   | 2896.3 | 3.1      | 0.21 | 0.12      | 10114 | 2   | 102 |
|          | 250 | 10   | 1   | 3391.7 | 5.4      | 0.20 | 0.10      | 2057  | 84  | 122 |
| Subtotal |     | 40   | 24  | 1953.2 | 2.5      | 0.28 | 0.15      | 4248  | 28  | 90  |
| 36       | 100 | 10   | 7   | 2235.3 | 2.3      | 1.12 | 0.57      | 4202  | 31  | 118 |
|          | 150 | 10   | 2   | 3006.6 | 7.0      | 0.62 | 0.47      | 6439  | 0   | 128 |
|          | 200 | 10   | 0   | 3600.0 | 17.0     | 0.87 | 0.55      | 3571  | 19  | 128 |
|          | 250 | 10   | 0   | 3600.0 | 35.5     | 0.72 | 0.59      | 2368  | 10  | 128 |
| Subtotal |     | 40   | 9   | 3110.5 | 15.4     | 0.83 | 0.54      | 4145  | 15  | 125 |
| 48       | 100 | 10   | 2   | 3320.0 | 9.7      | 1.59 | 0.70      | 1478  | 33  | 128 |
|          | 150 | 10   | 0   | 3600.0 | 30.7     | 1.41 | 0.89      | 607   | 65  | 128 |
|          | 200 | 10   | 0   | 3600.0 | 84.6     | 1.05 | 0.90      | 957   | 0   | 128 |
|          | 250 | 10   | 0   | 3600.0 | 172.2    | 1.56 | 1.21      | 487   | 13  | 128 |
| Subtotal |     | 40   | 2   | 3530.0 | 74.3     | 1.40 | 0.93      | 882   | 28  | 128 |
| 60       | 100 | 10   | 1   | 3542.6 | 27.9     | 0.94 | 0.62      | 1000  | 1   | 128 |
|          | 150 | 10   | 0   | 3600.0 | 117.5    | 1.07 | 0.83      | 597   | 0   | 128 |
|          | 200 | 10   | 0   | 3600.0 | 278.4    | 1.65 | 1.44      | 365   | 0   | 128 |
|          | 250 | 10   | 0   | 3600.0 | 599.2    | 4.97 | 4.84      | 241   | 0   | 128 |
| Subtotal |     | 40   | 1   | 3585.6 | 255.7    | 2.16 | 1.93      | 551   | 0   | 128 |
| 72       | 100 | 10   | 0   | 3600.0 | 58.4     | 2.25 | 0.90      | 317   | 38  | 128 |
|          | 150 | 10   | 0   | 3600.0 | 253.6    | 2.94 | 2.07      | 160   | 44  | 128 |
|          | 200 | 10   | 0   | 3600.0 | 670.7    | 4.37 | 3.71      | 56    | 78  | 128 |
|          | 250 | 10   | 0   | 3600.0 | 1438.7   | 6.65 | 6.29      | 21    | 109 | 128 |
| Subtotal |     | 40   | 0   | 3600.0 | 605.3    | 4.05 | 3.24      | 139   | 67  | 128 |
| Total    |     | 200  | 36  | 3155.9 | 190.7    | 1.75 | 1.36      | 1993  | 28  | 120 |

**Table EC.38** Detailed results of our BPC algorithm for the *W&G-u* instances and the return strategy

| $Q$      | $n$ | Inst | Opt | $t[s]$ | $t^{LP}$ | Gp   | $Gp^{RF}$ | Nds  | CC  | SRC |
|----------|-----|------|-----|--------|----------|------|-----------|------|-----|-----|
| 24       | 100 | 10   | 10  | 34.0   | 0.3      | 0.30 | 0.19      | 118  | 0   | 42  |
|          | 150 | 10   | 10  | 777.8  | 0.8      | 0.42 | 0.18      | 856  | 43  | 57  |
|          | 200 | 10   | 9   | 1399.0 | 2.2      | 0.24 | 0.15      | 3727 | 1   | 71  |
|          | 250 | 10   | 1   | 3290.1 | 3.5      | 0.38 | 0.24      | 1186 | 50  | 88  |
| Subtotal |     | 40   | 30  | 1375.2 | 1.7      | 0.33 | 0.19      | 1472 | 24  | 65  |
| 36       | 100 | 10   | 6   | 2793.7 | 2.3      | 1.06 | 0.52      | 2544 | 61  | 97  |
|          | 150 | 10   | 1   | 3336.6 | 7.6      | 0.63 | 0.50      | 4493 | 0   | 98  |
|          | 200 | 10   | 0   | 3600.0 | 15.9     | 1.09 | 0.71      | 1478 | 18  | 120 |
|          | 250 | 10   | 0   | 3600.0 | 30.9     | 1.11 | 0.88      | 513  | 54  | 126 |
| Subtotal |     | 40   | 7   | 3332.6 | 14.2     | 0.97 | 0.65      | 2257 | 33  | 110 |
| 48       | 100 | 10   | 3   | 3251.1 | 11.9     | 1.79 | 0.77      | 786  | 85  | 124 |
|          | 150 | 10   | 0   | 3600.0 | 39.1     | 1.72 | 1.29      | 429  | 92  | 126 |
|          | 200 | 10   | 0   | 3600.0 | 94.9     | 1.42 | 1.26      | 626  | 0   | 126 |
|          | 250 | 10   | 0   | 3600.0 | 168.6    | 1.95 | 1.65      | 339  | 14  | 128 |
| Subtotal |     | 40   | 3   | 3512.8 | 78.6     | 1.72 | 1.24      | 545  | 48  | 126 |
| 60       | 100 | 10   | 0   | 3600.0 | 60.1     | 1.47 | 1.16      | 597  | 0   | 125 |
|          | 150 | 10   | 0   | 3600.0 | 193.2    | 1.66 | 1.47      | 368  | 0   | 126 |
|          | 200 | 10   | 0   | 3600.0 | 494.8    | 2.20 | 2.02      | 212  | 0   | 128 |
|          | 250 | 10   | 0   | 3600.0 | 873.5    | 2.40 | 2.26      | 127  | 0   | 128 |
| Subtotal |     | 40   | 0   | 3600.0 | 405.4    | 1.93 | 1.73      | 326  | 0   | 127 |
| 72       | 100 | 10   | 0   | 3600.0 | 287.2    | 3.53 | 1.71      | 123  | 101 | 128 |
|          | 150 | 10   | 0   | 3600.0 | 984.1    | 5.73 | 4.66      | 55   | 144 | 128 |
|          | 200 | 10   | 0   | 3600.0 | 2408.6   | 9.80 |           | 3    | 151 | 103 |
|          | 250 | 10   | 0   | 3600.0 | 3600.0   |      |           | 0    | 0   | 0   |
| Subtotal |     | 40   | 0   | 3600.0 | 1820.0   |      |           | 45   | 99  | 90  |
| Total    |     | 200  | 40  | 3084.1 | 464.0    |      |           | 929  | 41  | 104 |

**Table EC.39** Detailed results of our BPC algorithm for the *w&g-u* instances and the midpoint strategy

| $Q$      | $n$ | Inst | Opt | $t[s]$ | $t^{LP}$ | Gp   | $Gp^{RF}$ | Nds  | CC | SRC |
|----------|-----|------|-----|--------|----------|------|-----------|------|----|-----|
| 24       | 100 | 10   | 10  | 37.8   | 0.4      | 0.34 | 0.19      | 176  | 0  | 42  |
|          | 150 | 10   | 10  | 577.4  | 1.0      | 0.44 | 0.18      | 1381 | 14 | 58  |
|          | 200 | 10   | 8   | 1908.6 | 3.0      | 0.27 | 0.17      | 5843 | 0  | 68  |
|          | 250 | 10   | 0   | 3600.0 | 4.6      | 0.38 | 0.25      | 2710 | 22 | 90  |
| Subtotal |     | 40   | 28  | 1531.0 | 2.3      | 0.36 | 0.20      | 2528 | 9  | 65  |
| 36       | 100 | 10   | 8   | 1737.4 | 3.4      | 0.96 | 0.50      | 2719 | 38 | 88  |
|          | 150 | 10   | 0   | 3600.0 | 11.1     | 0.90 | 0.76      | 4311 | 0  | 92  |
|          | 200 | 10   | 0   | 3600.0 | 23.9     | 1.30 | 0.99      | 1713 | 9  | 105 |
|          | 250 | 10   | 0   | 3600.0 | 44.3     | 1.31 | 1.11      | 778  | 19 | 123 |
| Subtotal |     | 40   | 8   | 3134.4 | 20.7     | 1.12 | 0.84      | 2380 | 17 | 102 |
| 48       | 100 | 10   | 1   | 3538.3 | 23.4     | 1.75 | 0.94      | 1370 | 50 | 120 |
|          | 150 | 10   | 0   | 3600.0 | 79.4     | 2.06 | 1.60      | 618  | 54 | 122 |
|          | 200 | 10   | 0   | 3600.0 | 172.2    | 1.95 | 1.80      | 424  | 0  | 122 |
|          | 250 | 10   | 0   | 3600.0 | 353.7    | 2.53 | 2.27      | 247  | 13 | 128 |
| Subtotal |     | 40   | 1   | 3584.6 | 157.2    | 2.07 | 1.65      | 665  | 29 | 123 |
| 60       | 100 | 10   | 0   | 3600.0 | 152.7    | 1.79 | 1.50      | 315  | 0  | 114 |
|          | 150 | 10   | 0   | 3600.0 | 578.8    | 2.45 | 2.26      | 146  | 0  | 121 |
|          | 200 | 10   | 0   | 3600.0 | 1348.5   | 3.17 | 3.01      | 86   | 0  | 125 |
|          | 250 | 10   | 0   | 3600.0 | 2522.8   | 7.98 | 7.83      | 28   | 0  | 128 |
| Subtotal |     | 40   | 0   | 3600.0 | 1150.7   | 3.85 | 3.65      | 144  | 0  | 122 |
| 72       | 100 | 10   | 0   | 3600.0 | 994.5    | 4.57 | 3.14      | 83   | 72 | 126 |
|          | 150 | 10   | 0   | 3600.0 | 3600.0   |      |           | 0    | 0  | 0   |
|          | 200 | 10   | 0   | 3600.0 | 3600.0   |      |           | 0    | 0  | 0   |
|          | 250 | 10   | 0   | 3600.0 | 3600.0   |      |           | 0    | 0  | 0   |
| Subtotal |     | 40   | 0   | 3600.0 | 2948.6   |      |           | 21   | 18 | 32  |
| Total    |     | 200  | 37  | 3090.0 | 855.9    |      |           | 1148 | 15 | 89  |

**Table EC.40** Detailed results of our BPC algorithm for the *w&g-u* instances and the largest gap strategy

| $Q$      | $n$ | Inst | Opt | $t[s]$ | $t^{LP}$ | Gp    | $Gp^{RF}$ | Nds  | CC | SRC |
|----------|-----|------|-----|--------|----------|-------|-----------|------|----|-----|
| 24       | 100 | 10   | 10  | 24.5   | 0.4      | 0.28  | 0.14      | 77   | 0  | 48  |
|          | 150 | 10   | 9   | 679.2  | 1.2      | 0.36  | 0.14      | 1834 | 20 | 60  |
|          | 200 | 10   | 5   | 2548.2 | 3.3      | 0.30  | 0.21      | 6710 | 0  | 74  |
|          | 250 | 10   | 0   | 3600.0 | 5.9      | 0.35  | 0.22      | 2674 | 24 | 91  |
| Subtotal |     | 40   | 24  | 1713.0 | 2.7      | 0.32  | 0.18      | 2824 | 11 | 68  |
| 36       | 100 | 10   | 9   | 1809.8 | 4.7      | 0.93  | 0.48      | 2302 | 35 | 80  |
|          | 150 | 10   | 1   | 3380.1 | 14.7     | 0.77  | 0.63      | 2994 | 0  | 99  |
|          | 200 | 10   | 0   | 3600.0 | 31.9     | 1.32  | 0.98      | 1357 | 12 | 111 |
|          | 250 | 10   | 0   | 3600.0 | 57.9     | 1.28  | 1.09      | 643  | 24 | 123 |
| Subtotal |     | 40   | 10  | 3097.5 | 27.3     | 1.08  | 0.80      | 1824 | 18 | 103 |
| 48       | 100 | 10   | 0   | 3600.0 | 40.6     | 2.02  | 1.21      | 1070 | 56 | 118 |
|          | 150 | 10   | 0   | 3600.0 | 132.3    | 2.07  | 1.61      | 465  | 52 | 126 |
|          | 200 | 10   | 0   | 3600.0 | 282.9    | 2.00  | 1.85      | 323  | 0  | 123 |
|          | 250 | 10   | 0   | 3600.0 | 514.8    | 2.66  | 2.43      | 183  | 9  | 126 |
| Subtotal |     | 40   | 0   | 3600.0 | 242.7    | 2.19  | 1.78      | 510  | 29 | 123 |
| 60       | 100 | 10   | 0   | 3600.0 | 321.2    | 2.13  | 1.89      | 182  | 0  | 105 |
|          | 150 | 10   | 0   | 3600.0 | 1181.9   | 2.93  | 2.77      | 99   | 0  | 112 |
|          | 200 | 10   | 0   | 3600.0 | 2612.8   | 19.71 | 19.59     | 18   | 0  | 122 |
|          | 250 | 10   | 0   | 3600.0 | 3600.0   |       |           | 0    | 0  | 0   |
| Subtotal |     | 40   | 0   | 3600.0 | 1929.0   |       |           | 75   | 0  | 85  |
| 72       | 100 | 10   | 0   | 3600.0 | 2386.0   | 17.64 |           | 7    | 65 | 82  |
|          | 150 | 10   | 0   | 3600.0 | 3600.0   |       |           | 0    | 0  | 0   |
|          | 200 | 10   | 0   | 3600.0 | 3600.0   |       |           | 0    | 0  | 0   |
|          | 250 | 10   | 0   | 3600.0 | 3600.0   |       |           | 0    | 0  | 0   |
| Subtotal |     | 40   | 0   | 3600.0 | 3296.5   |       |           | 2    | 16 | 21  |
| Total    |     | 200  | 34  | 3122.1 | 1099.6   |       |           | 1047 | 15 | 80  |

**Table EC.41 Detailed results of our BPC algorithm for the  $W&G-u$  instances and the combined strategy**

| $Q$      | $n$ | Inst | Opt | $t[s]$ | $t^{LP}$ | Gp   | $Gp^{RF}$ | Nds  | CC  | SRC |
|----------|-----|------|-----|--------|----------|------|-----------|------|-----|-----|
| 24       | 100 | 10   | 10  | 28.5   | 0.4      | 0.27 | 0.15      | 119  | 0   | 45  |
|          | 150 | 10   | 8   | 1538.9 | 1.0      | 0.46 | 0.20      | 5158 | 26  | 56  |
|          | 200 | 10   | 6   | 2394.1 | 3.0      | 0.26 | 0.17      | 7607 | 0   | 75  |
|          | 250 | 10   | 0   | 3600.0 | 5.0      | 0.39 | 0.25      | 3206 | 25  | 100 |
| Subtotal |     | 40   | 24  | 1890.4 | 2.3      | 0.35 | 0.19      | 4022 | 13  | 69  |
| 36       | 100 | 10   | 5   | 2249.7 | 2.6      | 1.05 | 0.52      | 2736 | 40  | 112 |
|          | 150 | 10   | 1   | 3415.4 | 8.0      | 0.67 | 0.53      | 4927 | 0   | 110 |
|          | 200 | 10   | 0   | 3600.0 | 18.0     | 1.14 | 0.76      | 1532 | 13  | 124 |
|          | 250 | 10   | 0   | 3600.0 | 35.1     | 1.21 | 0.98      | 592  | 37  | 128 |
| Subtotal |     | 40   | 6   | 3216.3 | 15.9     | 1.02 | 0.70      | 2447 | 23  | 119 |
| 48       | 100 | 10   | 1   | 3577.4 | 10.2     | 2.01 | 0.98      | 1581 | 60  | 127 |
|          | 150 | 10   | 0   | 3600.0 | 34.1     | 1.67 | 1.14      | 538  | 78  | 128 |
|          | 200 | 10   | 0   | 3600.0 | 75.5     | 1.18 | 1.04      | 850  | 0   | 128 |
|          | 250 | 10   | 0   | 3600.0 | 141.2    | 1.62 | 1.28      | 384  | 17  | 128 |
| Subtotal |     | 40   | 1   | 3594.3 | 65.3     | 1.62 | 1.11      | 838  | 38  | 128 |
| 60       | 100 | 10   | 1   | 3423.7 | 39.9     | 1.39 | 1.10      | 776  | 0   | 126 |
|          | 150 | 10   | 0   | 3600.0 | 128.2    | 1.72 | 1.49      | 472  | 0   | 128 |
|          | 200 | 10   | 0   | 3600.0 | 290.3    | 1.72 | 1.55      | 297  | 0   | 128 |
|          | 250 | 10   | 0   | 3600.0 | 555.7    | 2.08 | 1.95      | 175  | 0   | 128 |
| Subtotal |     | 40   | 1   | 3555.9 | 253.5    | 1.73 | 1.52      | 430  | 0   | 127 |
| 72       | 100 | 10   | 0   | 3600.0 | 123.4    | 3.44 | 1.64      | 153  | 70  | 128 |
|          | 150 | 10   | 0   | 3600.0 | 452.7    | 3.94 | 2.67      | 66   | 128 | 128 |
|          | 200 | 10   | 0   | 3600.0 | 1132.2   | 5.50 | 4.78      | 34   | 144 | 128 |
|          | 250 | 10   | 0   | 3600.0 | 2168.1   | 6.48 | 6.15      | 16   | 142 | 128 |
| Subtotal |     | 40   | 0   | 3600.0 | 969.1    | 4.84 | 3.81      | 67   | 121 | 128 |
| Total    |     | 200  | 32  | 3171.4 | 261.2    | 1.91 | 1.47      | 1561 | 39  | 114 |

**Table EC.42** Detailed results of our BPC algorithm for the *w&g-u* instances and the optimal strategy

| $Q$      | $n$ | Inst | Opt | $t[s]$ | $t^{LP}$ | Gp    | $Gp^{RF}$ | Nds  | CC  | SRC |
|----------|-----|------|-----|--------|----------|-------|-----------|------|-----|-----|
| 24       | 100 | 10   | 10  | 54.0   | 0.7      | 0.29  | 0.17      | 183  | 0   | 54  |
|          | 150 | 10   | 10  | 1118.0 | 1.9      | 0.41  | 0.17      | 2564 | 28  | 54  |
|          | 200 | 10   | 3   | 3150.8 | 4.7      | 0.28  | 0.19      | 7668 | 0   | 73  |
|          | 250 | 10   | 0   | 3600.0 | 8.0      | 0.43  | 0.29      | 2241 | 34  | 85  |
| Subtotal |     | 40   | 23  | 1980.7 | 3.8      | 0.35  | 0.20      | 3164 | 16  | 66  |
| 36       | 100 | 10   | 7   | 2174.5 | 5.8      | 1.02  | 0.49      | 1810 | 50  | 102 |
|          | 150 | 10   | 0   | 3600.0 | 19.2     | 0.83  | 0.67      | 2292 | 0   | 112 |
|          | 200 | 10   | 0   | 3600.0 | 37.2     | 1.14  | 0.79      | 1008 | 17  | 127 |
|          | 250 | 10   | 0   | 3600.0 | 67.9     | 1.24  | 1.04      | 505  | 36  | 128 |
| Subtotal |     | 40   | 7   | 3243.6 | 32.5     | 1.06  | 0.75      | 1404 | 26  | 117 |
| 48       | 100 | 10   | 0   | 3600.0 | 32.4     | 1.83  | 0.84      | 820  | 76  | 124 |
|          | 150 | 10   | 0   | 3600.0 | 108.5    | 1.84  | 1.36      | 373  | 85  | 128 |
|          | 200 | 10   | 0   | 3600.0 | 223.9    | 1.55  | 1.40      | 343  | 0   | 128 |
|          | 250 | 10   | 0   | 3600.0 | 406.4    | 2.35  | 2.06      | 202  | 14  | 128 |
| Subtotal |     | 40   | 0   | 3600.0 | 192.8    | 1.89  | 1.42      | 434  | 44  | 127 |
| 60       | 100 | 10   | 0   | 3600.0 | 161.4    | 1.57  | 1.28      | 261  | 0   | 121 |
|          | 150 | 10   | 0   | 3600.0 | 532.4    | 2.04  | 1.85      | 153  | 0   | 128 |
|          | 200 | 10   | 0   | 3600.0 | 1126.5   | 2.08  | 1.92      | 91   | 0   | 128 |
|          | 250 | 10   | 0   | 3600.0 | 2035.2   | 4.32  | 4.18      | 43   | 0   | 128 |
| Subtotal |     | 40   | 0   | 3600.0 | 963.9    | 2.50  | 2.31      | 137  | 0   | 126 |
| 72       | 100 | 10   | 0   | 3600.0 | 648.4    | 3.72  | 1.88      | 67   | 92  | 128 |
|          | 150 | 10   | 0   | 3600.0 | 2437.4   | 15.16 |           | 10   | 136 | 115 |
|          | 200 | 10   | 0   | 3600.0 | 3600.0   |       |           | 0    | 0   | 0   |
|          | 250 | 10   | 0   | 3600.0 | 3600.0   |       |           | 0    | 0   | 0   |
| Subtotal |     | 40   | 0   | 3600.0 | 2571.5   |       |           | 19   | 57  | 61  |
| Total    |     | 200  | 30  | 3204.9 | 752.9    |       |           | 1032 | 29  | 100 |

### F.3. Detailed Results of BPC-based Heuristics

Tables EC.43–EC.48 provide aggregated results per capacity  $Q$  for the proposed BPC-based heuristics on the six benchmark sets and all considered routing strategies. They compare variants of the set-covering heuristic ( $SC$ ) and the depth-first heuristic ( $BPC-DF$ ) with hard time limits of 2, 3, and 5 minutes ( $-2$ ,  $-3$ ,  $-5$ ). The average gap with respect to the best known solution ( $Gp$ ) and the average computation time in seconds ( $t[s]$ ) are reported. In cases where no average could be computed for a given group, e.g., because no lower bound was available for one of the comprised instances, the corresponding cell is left blank.

**Table EC.43 Comparison of the BPC-based heuristics on the M&Ü instances**

| Routing     | $Q$      | SC heuristic |        |      |        |      |        | BPC-DF heuristic |        |          |        |          |        |
|-------------|----------|--------------|--------|------|--------|------|--------|------------------|--------|----------|--------|----------|--------|
|             |          | SC-2         |        | SC-3 |        | SC-5 |        | BPC-DF-2         |        | BPC-DF-3 |        | BPC-DF-5 |        |
|             |          | $Gp$         | $t[s]$ | $Gp$ | $t[s]$ | $Gp$ | $t[s]$ | $Gp$             | $t[s]$ | $Gp$     | $t[s]$ | $Gp$     | $t[s]$ |
| Traversal   | 24       | 0.09         | 5.6    | 0.09 | 5.6    | 0.09 | 5.6    | 0.02             | 40.4   | 0.02     | 54.8   | 0.01     | 78.1   |
|             | 36       | 0.50         | 52.6   | 0.40 | 68.2   | 0.33 | 92.9   | 0.22             | 80.4   | 0.17     | 115.6  | 0.11     | 181.3  |
|             | 48       | 1.63         | 64.5   | 1.58 | 87.8   | 1.07 | 129.7  | 0.67             | 89.5   | 0.40     | 131.8  | 0.29     | 214.7  |
|             | Subtotal | 0.74         | 40.9   | 0.69 | 53.9   | 0.50 | 76.1   | 0.30             | 70.1   | 0.20     | 100.8  | 0.14     | 158.1  |
| Return      | 24       | 0.08         | 6.1    | 0.08 | 6.7    | 0.08 | 7.0    | 0.04             | 30.3   | 0.03     | 38.8   | 0.01     | 55.0   |
|             | 36       | 0.44         | 49.9   | 0.33 | 65.8   | 0.31 | 88.0   | 0.20             | 64.2   | 0.16     | 91.4   | 0.08     | 141.9  |
|             | 48       | 2.02         | 64.7   | 1.50 | 89.7   | 1.41 | 136.1  | 1.19             | 75.2   | 0.70     | 108.5  | 0.36     | 168.6  |
|             | Subtotal | 0.85         | 40.2   | 0.64 | 54.1   | 0.60 | 77.0   | 0.48             | 56.6   | 0.30     | 79.6   | 0.15     | 121.8  |
| Midpoint    | 24       | 0.06         | 4.7    | 0.06 | 4.7    | 0.06 | 4.7    | 0.01             | 24.1   | 0.01     | 31.7   | 0.01     | 46.5   |
|             | 36       | 0.61         | 45.6   | 0.56 | 62.4   | 0.42 | 87.1   | 0.17             | 60.0   | 0.15     | 83.3   | 0.09     | 127.5  |
|             | 48       | 2.30         | 70.4   | 1.89 | 100.9  | 1.61 | 152.0  | 1.02             | 77.8   | 0.62     | 112.4  | 0.32     | 176.4  |
|             | Subtotal | 0.99         | 40.2   | 0.84 | 56.0   | 0.70 | 81.3   | 0.40             | 54.0   | 0.26     | 75.8   | 0.14     | 116.8  |
| Largest Gap | 24       | 0.06         | 4.1    | 0.06 | 4.1    | 0.06 | 4.1    | 0.02             | 30.6   | 0.01     | 38.8   | 0.01     | 51.1   |
|             | 36       | 0.62         | 49.9   | 0.54 | 65.8   | 0.44 | 96.1   | 0.16             | 65.8   | 0.14     | 93.8   | 0.09     | 146.6  |
|             | 48       | 2.47         | 72.4   | 2.01 | 100.5  | 1.75 | 153.7  | 1.19             | 82.0   | 0.75     | 117.6  | 0.45     | 187.5  |
|             | Subtotal | 1.05         | 42.1   | 0.87 | 56.8   | 0.75 | 84.6   | 0.45             | 59.4   | 0.30     | 83.4   | 0.18     | 128.4  |
| Combined    | 24       | 0.10         | 7.4    | 0.10 | 7.5    | 0.10 | 7.5    | 0.02             | 30.7   | 0.02     | 39.4   | 0.01     | 56.8   |
|             | 36       | 0.68         | 53.9   | 0.59 | 71.4   | 0.50 | 99.4   | 0.20             | 70.9   | 0.14     | 100.3  | 0.11     | 155.1  |
|             | 48       | 2.52         | 68.7   | 2.27 | 97.6   | 1.91 | 150.6  | 0.66             | 79.7   | 0.47     | 115.5  | 0.28     | 186.2  |
|             | Subtotal | 1.10         | 43.4   | 0.99 | 58.8   | 0.84 | 85.8   | 0.29             | 60.5   | 0.21     | 85.1   | 0.13     | 132.7  |
| Optimal     | 24       | 0.09         | 4.9    | 0.09 | 4.9    | 0.09 | 4.9    | 0.02             | 31.5   | 0.02     | 42.0   | 0.01     | 56.9   |
|             | 36       | 0.75         | 53.7   | 0.61 | 72.7   | 0.52 | 104.4  | 0.27             | 70.3   | 0.21     | 99.1   | 0.16     | 152.4  |
|             | 48       | 2.31         | 73.0   | 2.17 | 101.3  | 1.82 | 151.5  | 1.73             | 88.3   | 1.12     | 127.9  | 0.67     | 204.8  |
|             | Subtotal | 1.05         | 43.9   | 0.96 | 59.6   | 0.81 | 86.9   | 0.67             | 63.4   | 0.45     | 89.7   | 0.28     | 138.0  |
| Total       |          | 0.96         | 41.8   | 0.83 | 56.5   | 0.70 | 82.0   | 0.43             | 60.7   | 0.29     | 85.7   | 0.17     | 132.6  |

**Table EC.44 Comparison of the BPC-based heuristics on the H&W instances**

| Routing     | $Q$      | SC heuristic |      |      |      |      |      | BPC-DF heuristic |      |          |       |          |       |
|-------------|----------|--------------|------|------|------|------|------|------------------|------|----------|-------|----------|-------|
|             |          | SC-2         |      | SC-3 |      | SC-5 |      | BPC-DF-2         |      | BPC-DF-3 |       | BPC-DF-5 |       |
|             |          | Gp           | t[s] | Gp   | t[s] | Gp   | t[s] | Gp               | t[s] | Gp       | t[s]  | Gp       | t[s]  |
| Traversal   | 30       | 0.00         | 0.1  | 0.00 | 0.1  | 0.00 | 0.1  | 0.00             | 4.3  | 0.00     | 6.0   | 0.00     | 9.4   |
|             | 45       | 0.06         | 1.7  | 0.06 | 1.7  | 0.06 | 1.7  | 0.02             | 38.0 | 0.02     | 52.3  | 0.02     | 78.0  |
|             | 60       | 0.10         | 14.5 | 0.10 | 15.8 | 0.10 | 16.9 | 0.11             | 72.8 | 0.09     | 104.9 | 0.08     | 166.0 |
|             | 75       | 0.23         | 33.1 | 0.20 | 40.2 | 0.18 | 49.3 | 0.25             | 90.7 | 0.21     | 133.4 | 0.18     | 216.2 |
|             | Subtotal | 0.10         | 12.3 | 0.09 | 14.4 | 0.08 | 17.0 | 0.10             | 51.5 | 0.08     | 74.2  | 0.07     | 117.4 |
| Return      | 30       | 0.00         | 0.1  | 0.00 | 0.1  | 0.00 | 0.1  | 0.00             | 0.1  | 0.00     | 0.1   | 0.00     | 0.1   |
|             | 45       | 0.06         | 1.4  | 0.06 | 1.4  | 0.06 | 1.4  | 0.01             | 14.3 | 0.01     | 18.5  | 0.00     | 25.8  |
|             | 60       | 0.15         | 21.0 | 0.14 | 24.0 | 0.13 | 27.6 | 0.08             | 45.8 | 0.06     | 61.7  | 0.05     | 89.4  |
|             | 75       | 0.51         | 48.0 | 0.44 | 64.1 | 0.36 | 90.4 | 0.21             | 64.1 | 0.16     | 90.7  | 0.12     | 139.5 |
|             | Subtotal | 0.18         | 17.6 | 0.16 | 22.4 | 0.14 | 29.9 | 0.07             | 31.1 | 0.06     | 42.7  | 0.05     | 63.7  |
| Midpoint    | 30       | 0.00         | 0.0  | 0.00 | 0.0  | 0.00 | 0.0  | 0.00             | 0.0  | 0.00     | 0.0   | 0.00     | 0.0   |
|             | 45       | 0.04         | 1.0  | 0.04 | 1.0  | 0.04 | 1.0  | 0.00             | 7.9  | 0.00     | 9.5   | 0.00     | 11.8  |
|             | 60       | 0.15         | 15.6 | 0.14 | 17.6 | 0.13 | 20.0 | 0.05             | 41.2 | 0.04     | 55.5  | 0.03     | 79.9  |
|             | 75       | 0.52         | 44.5 | 0.46 | 58.5 | 0.39 | 81.3 | 0.18             | 63.3 | 0.14     | 89.6  | 0.11     | 136.7 |
|             | Subtotal | 0.18         | 15.3 | 0.16 | 19.3 | 0.14 | 25.6 | 0.06             | 28.1 | 0.05     | 38.6  | 0.04     | 57.1  |
| Largest gap | 30       | 0.00         | 0.1  | 0.00 | 0.1  | 0.00 | 0.1  | 0.00             | 0.2  | 0.00     | 0.3   | 0.00     | 0.5   |
|             | 45       | 0.04         | 1.1  | 0.04 | 1.1  | 0.04 | 1.1  | 0.00             | 9.6  | 0.00     | 11.5  | 0.00     | 14.6  |
|             | 60       | 0.14         | 18.5 | 0.13 | 21.0 | 0.12 | 23.1 | 0.06             | 44.6 | 0.05     | 61.4  | 0.04     | 90.7  |
|             | 75       | 0.57         | 47.1 | 0.50 | 62.7 | 0.43 | 88.5 | 0.25             | 67.0 | 0.20     | 95.1  | 0.15     | 147.0 |
|             | Subtotal | 0.19         | 16.7 | 0.17 | 21.2 | 0.15 | 28.2 | 0.08             | 30.4 | 0.06     | 42.1  | 0.05     | 63.2  |
| Combined    | 30       | 0.00         | 0.1  | 0.00 | 0.1  | 0.00 | 0.1  | 0.00             | 0.6  | 0.00     | 0.8   | 0.00     | 1.2   |
|             | 45       | 0.05         | 1.6  | 0.05 | 1.6  | 0.05 | 1.7  | 0.01             | 17.5 | 0.01     | 22.3  | 0.01     | 29.9  |
|             | 60       | 0.14         | 22.8 | 0.13 | 26.1 | 0.12 | 29.4 | 0.10             | 50.6 | 0.08     | 69.6  | 0.06     | 103.8 |
|             | 75       | 0.42         | 43.6 | 0.35 | 56.8 | 0.28 | 77.0 | 0.22             | 65.8 | 0.18     | 93.7  | 0.13     | 145.6 |
|             | Subtotal | 0.15         | 17.0 | 0.13 | 21.2 | 0.11 | 27.0 | 0.08             | 33.6 | 0.07     | 46.6  | 0.05     | 70.1  |
| Optimal     | 30       | 0.00         | 0.1  | 0.00 | 0.1  | 0.00 | 0.1  | 0.00             | 0.2  | 0.00     | 0.2   | 0.00     | 0.3   |
|             | 45       | 0.05         | 1.5  | 0.05 | 1.5  | 0.05 | 1.5  | 0.01             | 15.1 | 0.01     | 18.2  | 0.01     | 24.1  |
|             | 60       | 0.17         | 25.4 | 0.15 | 30.1 | 0.13 | 35.2 | 0.09             | 52.3 | 0.07     | 72.2  | 0.06     | 107.9 |
|             | 75       | 0.58         | 51.3 | 0.50 | 68.4 | 0.42 | 95.8 | 0.29             | 70.0 | 0.23     | 99.6  | 0.16     | 154.5 |
|             | Subtotal | 0.20         | 19.6 | 0.17 | 25.0 | 0.15 | 33.1 | 0.10             | 34.4 | 0.08     | 47.6  | 0.06     | 71.7  |
| Total       |          | 0.17         | 16.4 | 0.15 | 20.6 | 0.13 | 26.8 | 0.08             | 34.8 | 0.07     | 48.6  | 0.05     | 73.9  |

**Table EC.45 Comparison of the BPC-based heuristics on the ZKS instances**

| Routing     | $Q$ | $n$      | SC heuristic |       |      |       |      |       | BPC-DF heuristic |       |          |       |          |       |
|-------------|-----|----------|--------------|-------|------|-------|------|-------|------------------|-------|----------|-------|----------|-------|
|             |     |          | SC-2         |       | SC-3 |       | SC-5 |       | BPC-DF-2         |       | BPC-DF-3 |       | BPC-DF-5 |       |
|             |     |          | Gp           | t[s]  | Gp   | t[s]  | Gp   | t[s]  | Gp               | t[s]  | Gp       | t[s]  | Gp       | t[s]  |
| Traversal   | 6   | 200      | 0.05         | 2.3   | 0.05 | 2.3   | 0.05 | 2.3   | 0.08             | 108.1 | 0.07     | 162.1 | 0.07     | 270.1 |
|             | 6   | 300      | 0.03         | 8.0   | 0.03 | 8.0   | 0.03 | 8.0   | 0.11             | 108.1 | 0.06     | 162.1 | 0.05     | 270.1 |
|             | 6   | 400      | 0.03         | 18.6  | 0.03 | 18.8  | 0.03 | 18.9  | 0.23             | 109.8 | 0.17     | 163.8 | 0.15     | 271.7 |
|             | 6   | 500      | 0.02         | 40.2  | 0.02 | 41.8  | 0.02 | 41.8  | 0.48             | 120.0 | 0.44     | 180.0 | 0.38     | 300.0 |
|             | 6   | 600      | 0.02         | 53.7  | 0.02 | 59.5  | 0.02 | 60.0  | 1.04             | 120.0 | 0.62     | 180.1 | 0.38     | 300.0 |
|             | 9   | 200      | 0.16         | 28.3  | 0.16 | 28.2  | 0.16 | 28.3  | 1.48             | 120.0 | 1.25     | 180.0 | 1.06     | 300.0 |
|             | 12  | 200      | 1.49         | 119.6 | 1.14 | 179.4 | 1.07 | 293.8 | 1.73             | 120.0 | 1.46     | 180.0 | 1.09     | 300.0 |
|             | 15  | 200      | 3.41         | 119.6 | 2.98 | 179.4 | 2.69 | 298.9 | 3.68             | 120.0 | 2.20     | 180.0 | 1.67     | 300.0 |
|             |     | Subtotal |              | 0.65  | 48.8 | 0.55  | 64.7 | 0.51  | 94.0             | 1.10  | 115.8    | 0.78  | 173.5    | 0.61  |
| Return      | 6   | 200      | 0.02         | 2.2   | 0.02 | 2.2   | 0.02 | 2.2   | 0.16             | 108.4 | 0.15     | 162.4 | 0.09     | 270.4 |
|             | 6   | 300      | 0.02         | 4.6   | 0.02 | 4.6   | 0.02 | 4.6   | 0.16             | 120.0 | 0.15     | 180.0 | 0.13     | 300.0 |
|             | 6   | 400      | 0.04         | 37.9  | 0.03 | 39.8  | 0.03 | 39.6  | 0.25             | 120.0 | 0.21     | 180.0 | 0.19     | 300.0 |
|             | 6   | 500      | 0.04         | 52.5  | 0.03 | 59.6  | 0.03 | 71.6  | 0.50             | 120.0 | 0.34     | 180.0 | 0.29     | 300.0 |
|             | 6   | 600      | 0.04         | 71.0  | 0.03 | 90.3  | 0.03 | 120.8 | 0.51             | 120.0 | 0.49     | 180.0 | 0.37     | 300.0 |
|             | 9   | 200      | 0.12         | 30.3  | 0.12 | 30.3  | 0.12 | 30.2  | 0.67             | 120.0 | 0.51     | 180.0 | 0.50     | 300.0 |
|             | 12  | 200      | 0.70         | 116.8 | 0.40 | 170.5 | 0.35 | 255.7 | 1.19             | 120.0 | 1.16     | 180.0 | 0.81     | 300.0 |
|             | 15  | 200      | 1.52         | 119.6 | 1.36 | 179.3 | 1.04 | 298.8 | 1.60             | 120.0 | 1.21     | 180.0 | 1.07     | 300.0 |
|             |     | Subtotal |              | 0.31  | 54.4 | 0.25  | 72.1 | 0.21  | 102.9            | 0.63  | 118.6    | 0.53  | 177.8    | 0.43  |
| Midpoint    | 6   | 200      | 0.06         | 2.5   | 0.06 | 2.5   | 0.06 | 2.5   | 0.08             | 120.0 | 0.08     | 180.0 | 0.07     | 300.0 |
|             | 6   | 300      | 0.03         | 8.0   | 0.03 | 7.9   | 0.03 | 8.0   | 0.14             | 108.5 | 0.12     | 162.5 | 0.10     | 270.5 |
|             | 6   | 400      | 0.03         | 17.5  | 0.03 | 17.6  | 0.03 | 17.2  | 0.40             | 120.0 | 0.24     | 180.0 | 0.21     | 300.0 |
|             | 6   | 500      | 0.04         | 52.8  | 0.04 | 64.7  | 0.04 | 79.2  | 0.42             | 120.0 | 0.33     | 180.0 | 0.29     | 300.0 |
|             | 6   | 600      | 0.05         | 79.2  | 0.03 | 96.2  | 0.03 | 120.0 | 0.65             | 120.0 | 0.55     | 180.0 | 0.47     | 300.0 |
|             | 9   | 200      | 0.18         | 33.2  | 0.18 | 33.1  | 0.18 | 33.1  | 0.89             | 120.0 | 0.79     | 180.0 | 0.55     | 300.0 |
|             | 12  | 200      | 1.18         | 119.6 | 0.80 | 174.7 | 0.41 | 270.3 | 1.16             | 120.0 | 0.85     | 180.0 | 0.63     | 300.0 |
|             | 15  | 200      | 2.88         | 119.7 | 2.56 | 179.5 | 2.28 | 299.1 | 3.11             | 120.0 | 2.09     | 180.0 | 1.70     | 300.0 |
|             |     | Subtotal |              | 0.56  | 54.1 | 0.47  | 72.0 | 0.38  | 103.7            | 0.86  | 118.6    | 0.63  | 177.8    | 0.50  |
| Largest gap | 6   | 200      | 0.05         | 2.8   | 0.05 | 2.8   | 0.05 | 2.8   | 0.10             | 108.6 | 0.09     | 162.6 | 0.08     | 270.6 |
|             | 6   | 300      | 0.04         | 7.3   | 0.04 | 7.3   | 0.04 | 7.3   | 0.17             | 120.0 | 0.13     | 180.0 | 0.10     | 300.0 |
|             | 6   | 400      | 0.03         | 18.9  | 0.03 | 19.0  | 0.03 | 18.8  | 0.25             | 120.0 | 0.24     | 180.0 | 0.22     | 300.0 |
|             | 6   | 500      | 0.03         | 41.9  | 0.03 | 42.8  | 0.03 | 42.8  | 0.56             | 120.0 | 0.48     | 180.0 | 0.36     | 300.0 |
|             | 6   | 600      | 0.03         | 67.4  | 0.03 | 80.0  | 0.03 | 101.6 | 1.44             | 120.0 | 0.58     | 180.0 | 0.52     | 300.0 |
|             | 9   | 200      | 0.15         | 47.1  | 0.15 | 53.3  | 0.15 | 65.1  | 1.03             | 120.0 | 0.81     | 180.0 | 0.64     | 300.0 |
|             | 12  | 200      | 0.85         | 112.9 | 0.49 | 166.7 | 0.51 | 251.5 | 1.14             | 120.0 | 1.07     | 180.0 | 0.85     | 300.0 |
|             | 15  | 200      | 2.54         | 119.6 | 2.30 | 179.3 | 1.86 | 298.8 | 2.71             | 120.0 | 2.42     | 180.0 | 1.69     | 300.0 |
|             |     | Subtotal |              | 0.47  | 52.2 | 0.39  | 68.9 | 0.34  | 98.6             | 0.93  | 118.6    | 0.73  | 177.8    | 0.56  |
| Combined    | 6   | 200      | 0.04         | 2.7   | 0.04 | 2.7   | 0.04 | 2.7   | 0.13             | 106.0 | 0.12     | 153.9 | 0.11     | 250.7 |
|             | 6   | 300      | 0.03         | 7.3   | 0.03 | 7.2   | 0.03 | 7.2   | 0.28             | 120.0 | 0.20     | 180.0 | 0.19     | 300.0 |
|             | 6   | 400      | 0.03         | 16.7  | 0.03 | 16.7  | 0.03 | 16.7  | 0.23             | 120.0 | 0.22     | 180.0 | 0.13     | 300.0 |
|             | 6   | 500      | 0.03         | 36.6  | 0.03 | 41.2  | 0.03 | 40.9  | 0.36             | 120.0 | 0.28     | 180.0 | 0.22     | 300.0 |
|             | 6   | 600      | 0.03         | 82.0  | 0.03 | 94.0  | 0.03 | 109.6 | 0.64             | 120.0 | 0.53     | 180.0 | 0.36     | 300.0 |
|             | 9   | 200      | 0.13         | 36.2  | 0.13 | 40.6  | 0.13 | 40.5  | 0.65             | 120.0 | 0.55     | 180.0 | 0.50     | 300.0 |
|             | 12  | 200      | 0.58         | 112.0 | 0.32 | 156.6 | 0.24 | 240.3 | 1.04             | 120.0 | 0.84     | 180.0 | 0.72     | 300.0 |
|             | 15  | 200      | 2.23         | 119.7 | 2.20 | 179.4 | 2.10 | 299.0 | 2.55             | 120.0 | 2.01     | 180.0 | 1.59     | 300.0 |
|             |     | Subtotal |              | 0.39  | 51.7 | 0.35  | 67.3 | 0.33  | 94.6             | 0.73  | 118.3    | 0.59  | 176.7    | 0.48  |
| Optimal     | 6   | 200      | 0.05         | 2.8   | 0.05 | 2.8   | 0.05 | 2.8   | 0.13             | 111.3 | 0.13     | 165.1 | 0.10     | 273.1 |
|             | 6   | 300      | 0.05         | 12.1  | 0.05 | 12.0  | 0.05 | 12.2  | 0.16             | 120.0 | 0.15     | 180.0 | 0.12     | 300.0 |
|             | 6   | 400      | 0.03         | 17.0  | 0.03 | 17.0  | 0.03 | 16.9  | 0.27             | 120.0 | 0.21     | 180.0 | 0.15     | 300.0 |
|             | 6   | 500      | 0.03         | 31.3  | 0.03 | 31.2  | 0.03 | 31.2  | 0.32             | 120.0 | 0.29     | 180.0 | 0.24     | 300.0 |
|             | 6   | 600      | 0.03         | 78.0  | 0.03 | 95.9  | 0.03 | 111.3 | 1.20             | 120.0 | 0.47     | 180.0 | 0.33     | 300.0 |
|             | 9   | 200      | 0.09         | 33.0  | 0.08 | 33.2  | 0.08 | 33.2  | 0.87             | 120.0 | 0.61     | 180.0 | 0.59     | 300.0 |
|             | 12  | 200      | 0.88         | 119.3 | 0.63 | 177.0 | 0.41 | 273.5 | 1.24             | 120.0 | 1.03     | 180.0 | 1.02     | 300.0 |
|             | 15  | 200      | 2.71         | 119.6 | 2.51 | 179.4 | 2.27 | 299.0 | 2.13             | 120.0 | 1.37     | 180.0 | 1.18     | 300.0 |
|             |     | Subtotal |              | 0.48  | 51.6 | 0.43  | 68.6 | 0.37  | 97.5             | 0.79  | 118.9    | 0.53  | 178.2    | 0.46  |
| Total       |     |          | 0.48         | 52.1  | 0.41 | 68.9  | 0.36 | 98.6  | 0.84             | 118.1 | 0.63     | 177.0 | 0.51     | 294.7 |

**Table EC.46 Comparison of the BPC-based heuristics on the M&ü-ext instances**

| Routing     | $Q$      | SC heuristic |       |       |       |      |       | BPC-DF heuristic |       |          |       |          |       |
|-------------|----------|--------------|-------|-------|-------|------|-------|------------------|-------|----------|-------|----------|-------|
|             |          | SC-2         |       | SC-3  |       | SC-5 |       | BPC-DF-2         |       | BPC-DF-3 |       | BPC-DF-5 |       |
|             |          | Gp           | t[s]  | Gp    | t[s]  | Gp   | t[s]  | Gp               | t[s]  | Gp       | t[s]  | Gp       | t[s]  |
| Traversal   | 60       | 4.52         | 84.6  | 3.99  | 120.3 | 3.55 | 185.3 | 1.71             | 94.5  | 0.98     | 139.8 | 0.50     | 226.4 |
|             | 72       | 7.51         | 87.1  | 6.18  | 122.9 | 5.18 | 190.8 | 6.56             | 100.6 | 4.05     | 147.1 | 1.57     | 234.8 |
|             | Subtotal | 6.02         | 85.8  | 5.08  | 121.6 | 4.36 | 188.1 | 4.14             | 97.5  | 2.51     | 143.4 | 1.04     | 230.6 |
| Return      | 60       | 5.93         | 79.4  | 4.77  | 108.8 | 3.88 | 161.4 | 4.61             | 81.7  | 2.84     | 117.3 | 1.06     | 181.6 |
|             | 72       | 10.23        | 89.8  | 9.61  | 128.8 | 8.87 | 201.6 | 10.63            | 96.7  | 9.68     | 140.7 | 7.57     | 226.7 |
|             | Subtotal | 8.08         | 84.6  | 7.19  | 118.8 | 6.38 | 181.5 | 7.62             | 89.2  | 6.26     | 129.0 | 4.31     | 204.2 |
| Midpoint    | 60       | 8.43         | 81.3  | 6.97  | 115.8 | 4.75 | 174.6 | 8.36             | 86.2  | 5.56     | 123.9 | 2.95     | 198.5 |
|             | 72       |              | 95.4  |       | 135.5 |      | 211.1 |                  | 98.8  |          | 142.0 |          | 227.0 |
|             | Subtotal |              | 88.3  |       | 125.7 |      | 192.8 |                  | 92.5  |          | 132.9 |          | 212.8 |
| Largest gap | 60       | 10.20        | 89.3  | 9.48  | 126.4 | 7.14 | 197.7 | 9.51             | 91.9  | 8.73     | 133.8 | 6.33     | 212.9 |
|             | 72       |              | 99.0  |       | 143.5 |      | 229.3 |                  | 102.1 |          | 148.7 |          | 238.8 |
|             | Subtotal |              | 94.2  |       | 135.0 |      | 213.5 |                  | 97.0  |          | 141.2 |          | 225.9 |
| Combined    | 60       | 6.51         | 87.2  | 5.56  | 122.9 | 4.40 | 186.7 | 2.96             | 88.3  | 1.93     | 127.3 | 0.88     | 202.9 |
|             | 72       | 8.79         | 86.7  | 8.64  | 121.4 | 8.00 | 190.4 | 8.55             | 97.8  | 7.41     | 141.6 | 4.92     | 227.9 |
|             | Subtotal | 7.65         | 86.9  | 7.10  | 122.1 | 6.20 | 188.6 | 5.75             | 93.1  | 4.67     | 134.4 | 2.90     | 215.4 |
| Optimal     | 60       | 9.04         | 89.6  | 7.74  | 129.3 | 5.36 | 201.1 | 7.62             | 94.3  | 6.24     | 137.2 | 3.41     | 219.9 |
|             | 72       | 10.74        | 112.9 | 10.18 | 154.1 | 9.29 | 229.8 | 10.62            | 106.1 | 10.05    | 154.8 | 8.68     | 247.5 |
|             | Subtotal | 9.89         | 101.3 | 8.96  | 141.7 | 7.33 | 215.4 | 9.12             | 100.2 | 8.15     | 146.0 | 6.04     | 233.7 |
| Total       |          |              | 90.2  |       | 127.5 |      | 196.7 |                  | 94.9  |          | 137.8 |          | 220.4 |

**Table EC.47 Comparison of the BPC-based heuristics on the W&G-g instances**

| Routing     | $Q$      | SC heuristic |       |       |       |       |       | BPC-DF heuristic |       |          |       |          |       |
|-------------|----------|--------------|-------|-------|-------|-------|-------|------------------|-------|----------|-------|----------|-------|
|             |          | SC-2         |       | SC-3  |       | SC-5  |       | BPC-DF-2         |       | BPC-DF-3 |       | BPC-DF-5 |       |
|             |          | Gp           | t[s]  | Gp    | t[s]  | Gp    | t[s]  | Gp               | t[s]  | Gp       | t[s]  | Gp       | t[s]  |
| Traversal   | 24       | 1.08         | 111.0 | 0.81  | 158.8 | 0.56  | 240.3 | 2.10             | 120.0 | 0.96     | 179.4 | 0.47     | 297.0 |
|             | 36       | 3.69         | 119.8 | 3.10  | 179.5 | 2.94  | 299.1 | 7.75             | 120.0 | 4.44     | 180.0 | 1.88     | 300.0 |
|             | 48       | 15.73        | 119.9 | 13.63 | 179.9 | 7.75  | 299.6 | 16.66            | 120.0 | 14.36    | 180.0 | 9.33     | 300.1 |
|             | 60       |              | 120.0 |       | 180.0 |       | 299.9 |                  | 120.0 |          | 180.0 |          | 300.0 |
|             | 72       |              | 120.0 |       | 180.0 |       | 300.0 |                  | 120.0 |          | 180.0 |          | 300.0 |
|             | Subtotal |              | 118.1 |       | 175.6 |       | 287.8 |                  | 120.0 |          | 179.9 |          | 299.4 |
| Return      | 24       | 0.90         | 104.2 | 0.71  | 148.9 | 0.52  | 229.0 | 0.67             | 120.0 | 0.42     | 179.0 | 0.34     | 297.0 |
|             | 36       | 4.76         | 119.8 | 3.22  | 179.7 | 2.93  | 299.3 | 7.33             | 120.1 | 5.25     | 180.0 | 2.38     | 300.0 |
|             | 48       | 15.68        | 120.0 | 13.78 | 179.9 | 10.90 | 299.7 | 16.81            | 120.0 | 14.99    | 180.0 | 11.09    | 300.1 |
|             | 60       |              | 120.0 |       | 180.0 |       | 300.0 |                  | 120.0 |          | 180.0 |          | 300.0 |
|             | 72       |              | 120.0 |       | 180.0 |       | 300.0 |                  | 120.0 |          | 180.0 |          | 300.1 |
|             | Subtotal |              | 116.8 |       | 173.7 |       | 285.6 |                  | 120.0 |          | 179.8 |          | 299.5 |
| Midpoint    | 24       | 0.94         | 107.5 | 0.80  | 151.1 | 0.67  | 226.4 | 0.52             | 118.7 | 0.38     | 177.4 | 0.33     | 293.3 |
|             | 36       | 5.41         | 119.8 | 3.18  | 179.6 | 3.08  | 299.2 | 7.33             | 120.1 | 4.35     | 180.0 | 1.82     | 300.0 |
|             | 48       | 18.96        | 120.0 | 15.90 | 179.9 | 12.85 | 299.7 | 20.38            | 120.0 | 17.61    | 180.0 | 12.83    | 300.1 |
|             | 60       |              | 120.0 |       | 180.0 |       | 300.0 |                  | 120.0 |          | 180.0 |          | 300.0 |
|             | 72       |              | 120.0 |       | 180.0 |       | 300.0 |                  | 120.0 |          | 180.0 |          | 300.0 |
|             | Subtotal |              | 117.5 |       | 174.1 |       | 285.1 |                  | 119.8 |          | 179.5 |          | 298.7 |
| Largest gap | 24       | 1.02         | 104.2 | 0.93  | 148.6 | 0.70  | 228.5 | 0.59             | 119.2 | 0.48     | 178.2 | 0.31     | 294.4 |
|             | 36       | 5.93         | 119.8 | 3.32  | 179.2 | 3.20  | 296.8 | 7.69             | 120.0 | 5.85     | 180.0 | 2.30     | 300.0 |
|             | 48       | 18.53        | 120.0 | 17.36 | 180.0 | 13.38 | 299.8 | 19.23            | 120.0 | 17.90    | 180.0 | 14.79    | 300.0 |
|             | 60       |              | 120.0 |       | 180.0 |       | 300.0 |                  | 120.0 |          | 180.0 |          | 300.0 |
|             | 72       |              | 120.0 |       | 180.0 |       | 300.0 |                  | 120.0 |          | 180.0 |          | 300.0 |
|             | Subtotal |              | 116.8 |       | 173.6 |       | 285.0 |                  | 119.9 |          | 179.7 |          | 298.9 |
| Combined    | 24       | 1.08         | 112.8 | 0.89  | 163.1 | 0.67  | 255.0 | 1.21             | 120.0 | 0.73     | 179.4 | 0.46     | 297.5 |
|             | 36       | 4.01         | 119.8 | 3.45  | 179.5 | 3.17  | 299.1 | 8.09             | 120.0 | 4.05     | 180.0 | 2.19     | 300.0 |
|             | 48       | 15.03        | 119.9 | 12.41 | 179.8 | 9.49  | 299.6 | 16.58            | 120.0 | 14.19    | 180.1 | 10.53    | 300.1 |
|             | 60       |              | 120.0 |       | 180.0 |       | 299.9 |                  | 120.0 |          | 180.0 |          | 300.0 |
|             | 72       |              | 120.0 |       | 180.0 |       | 300.0 |                  | 120.0 |          | 180.1 |          | 300.0 |
|             | Subtotal |              | 118.5 |       | 176.5 |       | 290.7 |                  | 120.0 |          | 179.9 |          | 299.5 |
| Optimal     | 24       | 0.98         | 111.4 | 0.90  | 157.8 | 0.75  | 244.2 | 1.00             | 120.0 | 0.58     | 180.0 | 0.39     | 299.5 |
|             | 36       | 6.84         | 119.9 | 3.68  | 179.7 | 3.26  | 299.3 | 9.76             | 120.2 | 6.72     | 180.0 | 2.50     | 300.0 |
|             | 48       | 18.01        | 120.0 | 16.48 | 180.0 | 13.06 | 299.8 | 18.01            | 120.0 | 17.33    | 180.0 | 14.53    | 300.1 |
|             | 60       |              | 120.0 |       | 180.0 |       | 300.0 |                  | 120.0 |          | 180.0 |          | 300.0 |
|             | 72       |              | 120.0 |       | 180.0 |       | 300.0 |                  | 120.0 |          | 180.0 |          | 300.4 |
|             | Subtotal |              | 118.2 |       | 175.5 |       | 288.7 |                  | 120.1 |          | 180.0 |          | 300.0 |
| Total       |          |              | 117.7 |       | 174.8 |       | 287.1 |                  | 120.0 |          | 179.8 |          | 299.3 |

**Table EC.48** Comparison of the BPC-based heuristics on the W&G-u instances

| Routing     | $Q$      | SC heuristic |       |       |       |       |       | BPC-DF heuristic |       |          |       |          |       |
|-------------|----------|--------------|-------|-------|-------|-------|-------|------------------|-------|----------|-------|----------|-------|
|             |          | SC-2         |       | SC-3  |       | SC-5  |       | BPC-DF-2         |       | BPC-DF-3 |       | BPC-DF-5 |       |
|             |          | Gp           | t[s]  | Gp    | t[s]  | Gp    | t[s]  | Gp               | t[s]  | Gp       | t[s]  | Gp       | t[s]  |
| Traversal   | 24       | 0.15         | 61.7  | 0.09  | 75.7  | 0.06  | 90.0  | 1.04             | 103.5 | 0.62     | 151.9 | 0.13     | 247.0 |
|             | 36       | 3.63         | 116.7 | 3.35  | 172.4 | 3.05  | 278.7 | 6.00             | 120.0 | 1.22     | 180.0 | 0.90     | 299.1 |
|             | 48       | 12.79        | 119.9 | 11.84 | 179.7 | 7.47  | 299.4 | 13.26            | 120.0 | 8.54     | 180.1 | 5.59     | 300.0 |
|             | 60       | 21.50        | 119.9 | 19.53 | 179.8 | 18.34 | 299.6 | 20.10            | 120.0 | 16.44    | 180.0 | 14.64    | 300.0 |
|             | 72       | 23.12        | 120.0 | 22.99 | 179.9 | 21.46 | 299.8 | 24.17            | 120.0 | 22.00    | 180.0 | 20.51    | 300.0 |
|             | Subtotal | 12.24        | 107.6 | 11.56 | 157.5 | 10.08 | 253.5 | 12.91            | 116.7 | 9.76     | 174.4 | 8.35     | 289.2 |
| Return      | 24       | 0.31         | 76.0  | 0.27  | 102.8 | 0.14  | 141.4 | 0.23             | 94.6  | 0.18     | 138.0 | 0.12     | 221.5 |
|             | 36       | 4.18         | 119.6 | 2.96  | 179.3 | 2.60  | 297.4 | 5.32             | 120.0 | 4.16     | 180.0 | 1.51     | 300.0 |
|             | 48       | 12.79        | 119.9 | 10.01 | 179.8 | 6.47  | 299.4 | 13.31            | 120.0 | 10.75    | 180.2 | 6.65     | 300.0 |
|             | 60       | 20.09        | 120.0 | 19.84 | 179.9 | 17.12 | 299.8 | 18.03            | 120.0 | 17.84    | 180.0 | 14.28    | 300.0 |
|             | 72       |              | 120.0 |       | 180.0 |       | 300.0 |                  | 120.0 |          | 180.0 |          | 300.0 |
|             | Subtotal |              | 111.1 |       | 164.4 |       | 267.6 |                  | 114.9 |          | 171.6 |          | 284.3 |
| Midpoint    | 24       | 0.38         | 78.5  | 0.32  | 105.7 | 0.20  | 157.2 | 0.21             | 97.7  | 0.17     | 140.0 | 0.12     | 217.8 |
|             | 36       | 7.26         | 117.2 | 3.71  | 169.8 | 3.59  | 272.8 | 5.96             | 120.2 | 4.36     | 180.0 | 1.06     | 298.3 |
|             | 48       | 19.30        | 120.0 | 17.18 | 179.9 | 11.55 | 299.7 | 19.09            | 120.0 | 17.18    | 180.0 | 13.59    | 300.0 |
|             | 60       | 26.44        | 120.0 | 25.48 | 180.0 | 23.20 | 299.9 | 26.44            | 120.0 | 26.44    | 180.0 | 21.16    | 300.0 |
|             | 72       |              | 120.0 |       | 180.0 |       | 300.0 |                  | 120.0 |          | 180.0 |          | 300.0 |
|             | Subtotal |              | 111.1 |       | 163.1 |       | 265.9 |                  | 115.6 |          | 172.0 |          | 283.2 |
| Largest gap | 24       | 0.39         | 74.0  | 0.32  | 103.8 | 0.22  | 158.7 | 0.22             | 89.2  | 0.17     | 131.1 | 0.14     | 208.2 |
|             | 36       | 7.28         | 119.8 | 3.66  | 178.4 | 3.49  | 292.0 | 6.73             | 120.2 | 5.38     | 180.0 | 0.99     | 300.1 |
|             | 48       | 19.34        | 120.0 | 18.52 | 179.9 | 15.60 | 299.8 | 19.71            | 120.0 | 18.33    | 180.0 | 14.73    | 300.0 |
|             | 60       |              | 120.0 |       | 180.0 |       | 300.0 |                  | 120.0 |          | 180.0 |          | 300.0 |
|             | 72       |              | 120.0 |       | 180.0 |       | 300.0 |                  | 120.0 |          | 180.0 |          | 300.0 |
|             | Subtotal |              | 110.8 |       | 164.4 |       | 270.1 |                  | 113.9 |          | 170.2 |          | 281.7 |
| Combined    | 24       | 0.55         | 80.5  | 0.42  | 114.7 | 0.26  | 170.5 | 0.34             | 93.9  | 0.18     | 136.1 | 0.12     | 219.9 |
|             | 36       | 3.72         | 119.8 | 3.51  | 178.9 | 3.17  | 294.2 | 6.07             | 120.0 | 4.50     | 180.0 | 1.51     | 299.4 |
|             | 48       | 11.54        | 119.9 | 11.25 | 179.7 | 7.57  | 299.4 | 14.04            | 120.0 | 8.01     | 180.2 | 5.47     | 300.0 |
|             | 60       | 22.41        | 119.9 | 19.55 | 179.9 | 18.67 | 299.7 | 20.06            | 120.0 | 17.12    | 180.0 | 14.28    | 300.0 |
|             | 72       | 25.59        | 120.0 | 24.53 | 180.0 | 23.39 | 299.9 | 25.59            | 120.0 | 25.59    | 180.0 | 23.87    | 300.0 |
|             | Subtotal | 12.76        | 112.0 | 11.85 | 166.6 | 10.61 | 272.7 | 13.22            | 114.8 | 11.08    | 171.3 | 9.05     | 283.9 |
| Optimal     | 24       | 0.61         | 79.2  | 0.40  | 113.5 | 0.29  | 172.3 | 0.90             | 101.8 | 0.24     | 143.9 | 0.14     | 225.6 |
|             | 36       | 6.94         | 119.0 | 4.44  | 175.9 | 3.29  | 285.6 | 8.40             | 120.1 | 5.55     | 180.0 | 3.09     | 300.0 |
|             | 48       | 17.79        | 120.0 | 17.17 | 179.9 | 12.48 | 299.8 | 18.97            | 120.0 | 17.39    | 180.0 | 13.30    | 300.0 |
|             | 60       | 22.10        | 120.0 | 21.51 | 180.0 | 20.17 | 299.9 | 22.10            | 120.0 | 22.10    | 180.0 | 17.78    | 300.0 |
|             | 72       |              | 120.0 |       | 180.0 |       | 300.0 |                  | 120.0 |          | 180.0 |          | 300.0 |
|             | Subtotal |              | 111.6 |       | 165.9 |       | 271.5 |                  | 116.4 |          | 172.8 |          | 285.1 |
| Total       |          |              | 110.7 |       | 163.6 |       | 266.9 |                  | 115.4 |          | 172.1 |          | 284.6 |

#### F.4. Comparison of Routing Strategies

Tables EC.49–EC.52 provide a comparison of the different routing strategies with respect to the total traveled distances for the benchmark sets M&O, H&W, and ZKS aggregated by capacity  $Q$  and number of orders  $n$ . The H&W instances are further subdivided into the two groups *uniformly distributed demand* (UDD) and *class-based demand* (CBD). The columns report the percentage increase in the total traveled distances for the respective routing strategy compared to the optimal strategy. For the comparison, we use the best known solution for each instance and routing strategy.

**Table EC.49** Percentage increase in total traveled distances compared to the optimal strategy for the M&O instances

| $Q$   | $n$      | Traversal | Return | Midpoint | Largest gap | Combined |
|-------|----------|-----------|--------|----------|-------------|----------|
| 24    | 20       | 11.8%     | 33.3%  | 9.5%     | 5.6%        | 4.3%     |
|       | 30       | 10.3%     | 32.3%  | 9.9%     | 5.4%        | 3.3%     |
|       | 40       | 11.0%     | 31.8%  | 10.3%    | 6.0%        | 4.2%     |
|       | 50       | 10.8%     | 34.0%  | 10.1%    | 6.3%        | 4.0%     |
|       | 60       | 9.3%      | 32.2%  | 10.0%    | 5.8%        | 3.3%     |
|       | 70       | 10.3%     | 32.9%  | 9.3%     | 5.4%        | 3.9%     |
|       | 80       | 10.1%     | 32.9%  | 9.8%     | 5.9%        | 3.6%     |
|       | 90       | 10.0%     | 32.7%  | 9.7%     | 5.6%        | 3.3%     |
|       | 100      | 9.8%      | 33.1%  | 10.1%    | 5.8%        | 3.2%     |
|       | Subtotal |           | 10.4%  | 32.8%    | 9.9%        | 5.8%     |
| 36    | 20       | 8.7%      | 35.7%  | 14.1%    | 7.7%        | 3.0%     |
|       | 30       | 7.1%      | 35.2%  | 14.2%    | 8.4%        | 2.3%     |
|       | 40       | 7.6%      | 34.2%  | 13.7%    | 8.4%        | 2.9%     |
|       | 50       | 7.6%      | 35.7%  | 13.7%    | 8.6%        | 2.8%     |
|       | 60       | 6.6%      | 34.2%  | 13.6%    | 8.2%        | 2.2%     |
|       | 70       | 7.0%      | 34.8%  | 13.0%    | 7.9%        | 2.6%     |
|       | 80       | 6.6%      | 34.9%  | 13.2%    | 8.3%        | 2.5%     |
|       | 90       | 6.6%      | 34.4%  | 13.0%    | 8.0%        | 2.1%     |
|       | 100      | 6.3%      | 34.7%  | 13.1%    | 8.1%        | 2.2%     |
|       | Subtotal |           | 7.1%   | 34.9%    | 13.5%       | 8.2%     |
| 48    | 20       | 7.0%      | 37.0%  | 18.2%    | 10.8%       | 2.6%     |
|       | 30       | 5.4%      | 36.3%  | 18.0%    | 11.1%       | 1.9%     |
|       | 40       | 5.6%      | 35.5%  | 17.3%    | 10.9%       | 1.8%     |
|       | 50       | 5.2%      | 37.2%  | 16.8%    | 10.8%       | 1.9%     |
|       | 60       | 4.9%      | 36.3%  | 17.8%    | 11.3%       | 1.4%     |
|       | 70       | 5.2%      | 36.8%  | 16.5%    | 10.5%       | 1.8%     |
|       | 80       | 5.4%      | 37.2%  | 16.8%    | 10.8%       | 2.0%     |
|       | 90       | 4.4%      | 36.1%  | 15.9%    | 10.5%       | 1.6%     |
|       | 100      | 4.1%      | 36.3%  | 16.7%    | 10.4%       | 1.6%     |
|       | Subtotal |           | 5.3%   | 36.5%    | 17.1%       | 10.8%    |
| Total |          | 7.6%      | 34.7%  | 13.4%    | 8.2%        | 2.7%     |

**Table EC.50** Percentage increase in total traveled distances compared to the optimal strategy for the H&W UDD instances

| $Q$      | $n$ | Traversal | Return | Midpoint | Largest gap | Combined |
|----------|-----|-----------|--------|----------|-------------|----------|
| 30       | 20  | 18.8%     | 52.9%  | 15.0%    | 8.5%        | 7.6%     |
|          | 30  | 17.7%     | 53.1%  | 15.2%    | 8.8%        | 7.6%     |
|          | 40  | 17.1%     | 52.0%  | 15.7%    | 9.1%        | 7.2%     |
|          | 50  | 17.6%     | 52.6%  | 15.4%    | 8.8%        | 7.1%     |
|          | 60  | 17.3%     | 52.5%  | 15.5%    | 8.9%        | 7.1%     |
|          | 70  | 17.4%     | 52.8%  | 15.3%    | 8.9%        | 7.1%     |
|          | 80  | 16.9%     | 52.5%  | 15.6%    | 9.0%        | 7.0%     |
|          | 90  | 17.0%     | 52.9%  | 15.5%    | 8.9%        | 7.1%     |
|          | 100 | 17.2%     | 52.9%  | 15.5%    | 9.0%        | 7.0%     |
| Subtotal |     | 17.4%     | 52.7%  | 15.4%    | 8.9%        | 7.2%     |
| 45       | 20  | 10.4%     | 53.6%  | 20.7%    | 12.5%       | 4.5%     |
|          | 30  | 10.3%     | 54.1%  | 20.8%    | 12.8%       | 4.3%     |
|          | 40  | 10.2%     | 54.1%  | 20.7%    | 12.5%       | 4.3%     |
|          | 50  | 10.0%     | 54.0%  | 20.5%    | 12.7%       | 4.2%     |
|          | 60  | 9.9%      | 54.2%  | 20.6%    | 12.6%       | 4.2%     |
|          | 70  | 10.0%     | 54.0%  | 20.5%    | 12.5%       | 4.3%     |
|          | 80  | 9.8%      | 53.7%  | 20.3%    | 12.4%       | 4.1%     |
|          | 90  | 9.5%      | 53.6%  | 20.5%    | 12.5%       | 4.0%     |
|          | 100 | 9.7%      | 53.5%  | 20.1%    | 12.4%       | 4.1%     |
| Subtotal |     | 10.0%     | 53.9%  | 20.5%    | 12.5%       | 4.2%     |
| 60       | 20  | 7.8%      | 56.0%  | 24.7%    | 15.9%       | 3.3%     |
|          | 30  | 8.0%      | 56.1%  | 25.2%    | 16.1%       | 3.1%     |
|          | 40  | 7.7%      | 55.4%  | 25.1%    | 16.2%       | 2.8%     |
|          | 50  | 7.6%      | 55.8%  | 24.6%    | 16.0%       | 3.0%     |
|          | 60  | 7.5%      | 55.2%  | 24.4%    | 15.7%       | 3.0%     |
|          | 70  | 7.5%      | 55.2%  | 24.5%    | 15.8%       | 2.9%     |
|          | 80  | 7.3%      | 54.9%  | 24.6%    | 15.8%       | 2.8%     |
|          | 90  | 7.1%      | 55.2%  | 24.2%    | 15.7%       | 2.8%     |
|          | 100 | 7.2%      | 55.2%  | 24.2%    | 15.6%       | 2.8%     |
| Subtotal |     | 7.5%      | 55.4%  | 24.6%    | 15.9%       | 2.9%     |
| 75       | 20  | 6.2%      | 56.8%  | 28.9%    | 19.1%       | 2.6%     |
|          | 30  | 6.9%      | 57.4%  | 28.8%    | 19.3%       | 2.5%     |
|          | 40  | 6.6%      | 57.2%  | 28.7%    | 19.2%       | 2.3%     |
|          | 50  | 6.6%      | 57.0%  | 27.9%    | 18.9%       | 2.3%     |
|          | 60  | 6.4%      | 57.0%  | 28.1%    | 19.0%       | 2.2%     |
|          | 70  | 6.3%      | 57.1%  | 27.9%    | 19.0%       | 2.2%     |
|          | 80  | 6.1%      | 56.8%  | 27.8%    | 18.9%       | 2.0%     |
|          | 90  | 5.8%      | 56.5%  | 27.6%    | 18.8%       | 1.9%     |
|          | 100 | 5.7%      | 56.7%  | 27.5%    | 18.7%       | 1.9%     |
| Subtotal |     | 6.3%      | 56.9%  | 28.1%    | 19.0%       | 2.2%     |
| Total    |     | 10.2%     | 54.7%  | 22.1%    | 14.0%       | 4.1%     |

**Table EC.51** Percentage increase in total traveled distances compared to the optimal strategy for the H&W CBD instances

| $Q$   | $n$      | Traversal | Return | Midpoint | Largest gap | Combined |
|-------|----------|-----------|--------|----------|-------------|----------|
| 30    | 20       | 19.4%     | 51.9%  | 9.6%     | 5.4%        | 8.9%     |
|       | 30       | 19.7%     | 52.7%  | 9.2%     | 5.3%        | 8.9%     |
|       | 40       | 18.7%     | 52.4%  | 9.2%     | 5.3%        | 8.6%     |
|       | 50       | 19.3%     | 52.1%  | 9.3%     | 5.3%        | 8.7%     |
|       | 60       | 19.6%     | 52.1%  | 9.4%     | 5.4%        | 8.9%     |
|       | 70       | 19.1%     | 52.2%  | 9.6%     | 5.4%        | 8.6%     |
|       | 80       | 19.0%     | 52.4%  | 9.5%     | 5.4%        | 8.7%     |
|       | 90       | 18.7%     | 51.7%  | 9.5%     | 5.4%        | 8.4%     |
|       | 100      | 18.9%     | 52.2%  | 9.4%     | 5.3%        | 8.4%     |
|       | Subtotal |           | 19.2%  | 52.2%    | 9.4%        | 5.4%     |
| 45    | 20       | 12.7%     | 52.3%  | 12.7%    | 7.4%        | 5.8%     |
|       | 30       | 12.8%     | 53.2%  | 12.9%    | 7.4%        | 6.1%     |
|       | 40       | 11.9%     | 52.2%  | 12.3%    | 7.2%        | 5.8%     |
|       | 50       | 12.1%     | 52.4%  | 12.5%    | 7.3%        | 5.7%     |
|       | 60       | 12.0%     | 52.6%  | 12.7%    | 7.3%        | 5.7%     |
|       | 70       | 11.7%     | 52.2%  | 12.5%    | 7.2%        | 5.4%     |
|       | 80       | 11.8%     | 52.3%  | 12.2%    | 7.0%        | 5.6%     |
|       | 90       | 11.6%     | 52.1%  | 12.0%    | 7.0%        | 5.3%     |
|       | 100      | 11.8%     | 52.3%  | 11.9%    | 7.1%        | 5.5%     |
|       | Subtotal |           | 12.0%  | 52.4%    | 12.4%       | 7.2%     |
| 60    | 20       | 9.8%      | 52.7%  | 15.7%    | 9.3%        | 4.3%     |
|       | 30       | 9.7%      | 53.6%  | 15.5%    | 9.4%        | 4.3%     |
|       | 40       | 9.2%      | 53.9%  | 15.5%    | 9.4%        | 4.1%     |
|       | 50       | 9.0%      | 53.2%  | 15.3%    | 9.3%        | 4.2%     |
|       | 60       | 8.9%      | 52.8%  | 15.1%    | 9.1%        | 4.2%     |
|       | 70       | 8.7%      | 53.3%  | 15.1%    | 9.3%        | 4.1%     |
|       | 80       | 8.6%      | 52.9%  | 15.1%    | 9.2%        | 4.0%     |
|       | 90       | 8.7%      | 53.1%  | 15.2%    | 9.3%        | 4.0%     |
|       | 100      | 8.8%      | 53.2%  | 14.8%    | 9.1%        | 4.0%     |
|       | Subtotal |           | 9.1%   | 53.2%    | 15.2%       | 9.3%     |
| 75    | 20       | 8.6%      | 54.6%  | 19.0%    | 11.6%       | 3.7%     |
|       | 30       | 8.0%      | 53.7%  | 18.7%    | 11.7%       | 3.3%     |
|       | 40       | 7.7%      | 54.4%  | 17.9%    | 11.4%       | 3.1%     |
|       | 50       | 7.5%      | 54.2%  | 18.2%    | 11.4%       | 3.2%     |
|       | 60       | 6.9%      | 53.8%  | 17.9%    | 11.4%       | 2.9%     |
|       | 70       | 7.1%      | 54.3%  | 17.8%    | 11.3%       | 3.0%     |
|       | 80       | 7.1%      | 54.2%  | 17.7%    | 11.2%       | 3.1%     |
|       | 90       | 7.2%      | 54.0%  | 17.4%    | 11.1%       | 3.1%     |
|       | 100      | 7.1%      | 53.7%  | 17.0%    | 11.0%       | 3.1%     |
|       | Subtotal |           | 7.5%   | 54.1%    | 18.0%       | 11.3%    |
| Total |          | 11.8%     | 53.0%  | 13.7%    | 8.3%        | 5.4%     |

**Table EC.52** Percentage increase in total traveled distances compared to the optimal strategy for the ZKS instances

| $Q$   | $n$ | Traversal | Return | Midpoint | Largest gap | Combined |
|-------|-----|-----------|--------|----------|-------------|----------|
| 6     | 200 | 21.1%     | 30.7%  | 6.5%     | 6.2%        | 5.5%     |
|       | 300 | 21.0%     | 29.2%  | 6.8%     | 6.5%        | 5.3%     |
|       | 400 | 20.8%     | 28.9%  | 6.6%     | 6.3%        | 5.3%     |
|       | 500 | 21.2%     | 28.5%  | 6.6%     | 6.3%        | 5.3%     |
|       | 600 | 20.9%     | 28.0%  | 6.6%     | 6.2%        | 5.3%     |
| 9     | 200 | 17.4%     | 34.1%  | 6.1%     | 5.4%        | 5.2%     |
| 12    | 200 | 15.3%     | 38.8%  | 5.6%     | 4.5%        | 4.9%     |
| 15    | 200 | 14.2%     | 40.4%  | 6.1%     | 4.6%        | 4.5%     |
| Total |     | 19.0%     | 32.2%  | 6.4%     | 5.7%        | 5.2%     |

## References

- Achterberg T, 2007 *Constraint Integer Programming*. Ph.D. thesis, Technische Universität Berlin, Fakultät II – Mathematik und Naturwissenschaften, Berlin, Germany.
- Bahçeci U, Öncan T, 2022 *An evaluation of several combinations of routing and storage location assignment policies for the order batching problem*. *International Journal of Production Research* 60(19):5892–5911.
- Clarke G, Wright JW, 1964 *Scheduling of vehicles from a central depot to a number of delivery points*. *Operations Research* 12(4):568–581.
- Henn S, Wäscher G, 2012 *Tabu search heuristics for the order batching problem in manual order picking systems*. *European Journal of Operational Research* 222(3):484–494.
- Muter İ, Öncan T, 2015 *An exact solution approach for the order batching problem*. *IIE Transactions* 47(7):728–738.
- Petersen C, 1995 *Routeing and storage policy interaction in order picking operations*. *Decision Sciences Institute Proceedings*, volume 3, 1614–1616.
- Ratliff HD, Rosenthal AS, 1983 *Order-picking in a rectangular warehouse: A solvable case of the traveling salesman problem*. *Operations Research* 31(3):507–521.
- Roodbergen KJ, 2001 *Layout and routing methods for warehouses*. Ph.D. thesis, RSM Erasmus University, the Netherlands.
- Scholz A, Wäscher G, 2017 *Order batching and picker routing in manual order picking systems: the benefits of integrated routing*. *Central European Journal of Operations Research* 25(2):491–520.
- Žulj I, Kramer S, Schneider M, 2018 *A hybrid of adaptive large neighborhood search and tabu search for the order-batching problem*. *European Journal of Operational Research* 264(2):653–664.
